# Supplementary material for: Risk and temporal order of disease diagnosis of comorbidities in patients with COPD: a population health perspective
Source: PubMed Central journal article supplement — BMJ Open Respir Res. 2018 Jun 13;5(1):e000302. doi: 10.1136/bmjresp-2018-000302 (PMC6018856; doi:10.1136/bmjresp-2018-000302), 2018-06-13
Supplement: bmjresp-2018-000302supp001.pdf [file bmjresp-2018-000302supp001.pdf]

# Supplementary file 1

## Risk and temporal order of disease diagnosis of comorbidities in patients with COPD: a population health perspective

Ákos Tényi et al.

### Content

|                                                                                  |    |
|----------------------------------------------------------------------------------|----|
| Supplementary methods .....                                                      | 2  |
| Supplementary figures .....                                                      | 3  |
| Figure S1. Number of simultaneous diagnoses with COPD by disease group .....     | 3  |
| Figure S2. Comparison of the age-associated prevalence. ....                     | 5  |
| Supplementary tables.....                                                        | 6  |
| Table S1. ICD9 codes considered for the diagnosis of COPD. ....                  | 6  |
| Table S2. ICD9 codes by disease groups and their descriptor.....                 | 7  |
| Table S3. Comorbidity risk in the CHSS and Medicare datasets. ....               | 76 |
| Table S4. Proportion of chronic and acute disease in the Medicare dataset.. .... | 77 |
| REFERENCES.....                                                                  | 78 |

## Supplementary methods

Comorbidity was measured using co-occurrence based measures, the relative risk (RR) and phi-correlation ( $\Phi$ ) [1,2]. RR is expressed as the ratio between the actual observed number of patients with both diseases ( $C_{COPD,DG_i}$ ) and the random expectation to see both disease appear together in the population (denominator):

$$RR_{COPD,DG_i} = \frac{C_{COPD,DG_i}}{P_{COPD} P_{DG_i}/N}$$

where  $C_{COPD,DG_i}$  is the number of cases affected by both COPD and the  $i$ th DG,  $P_{COPD}$  and  $P_{DG_i}$  denotes the patients with COPD and  $DG_i$ , respectively, in a population size  $N$ .

The  $\Phi$ -correlation expresses the Pearson correlation coefficient for binary variables, i.e. between the COPD and disease group occurrences:

$$\Phi_{COPD,DG_i} = \frac{(N C_{COPD,DG_i}) - P_{COPD}P_{DG_i}}{\sqrt{P_{COPD}P_{DG_i}(N - P_{COPD})(N - P_{DG_i})}}$$

These two measures are complementary to each other as both have biases when estimating relationship strength, such that RR overestimates relationships of low prevalence diseases and underestimates the relation of highly prevalent diseases, whereas  $\Phi$  can underestimate highly associated diseases with different prevalence.

## Supplementary figures

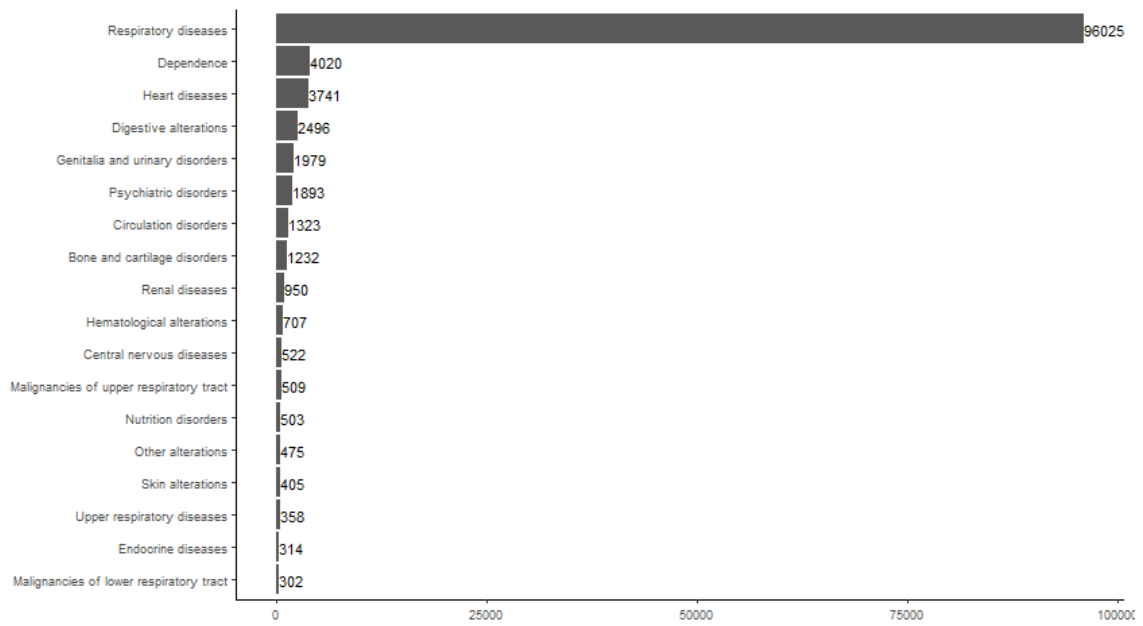

**Figure S1.** Number of simultaneous diagnoses with COPD (x-axis) (i.e., for the first time in the same visit) by disease group (y-axis).

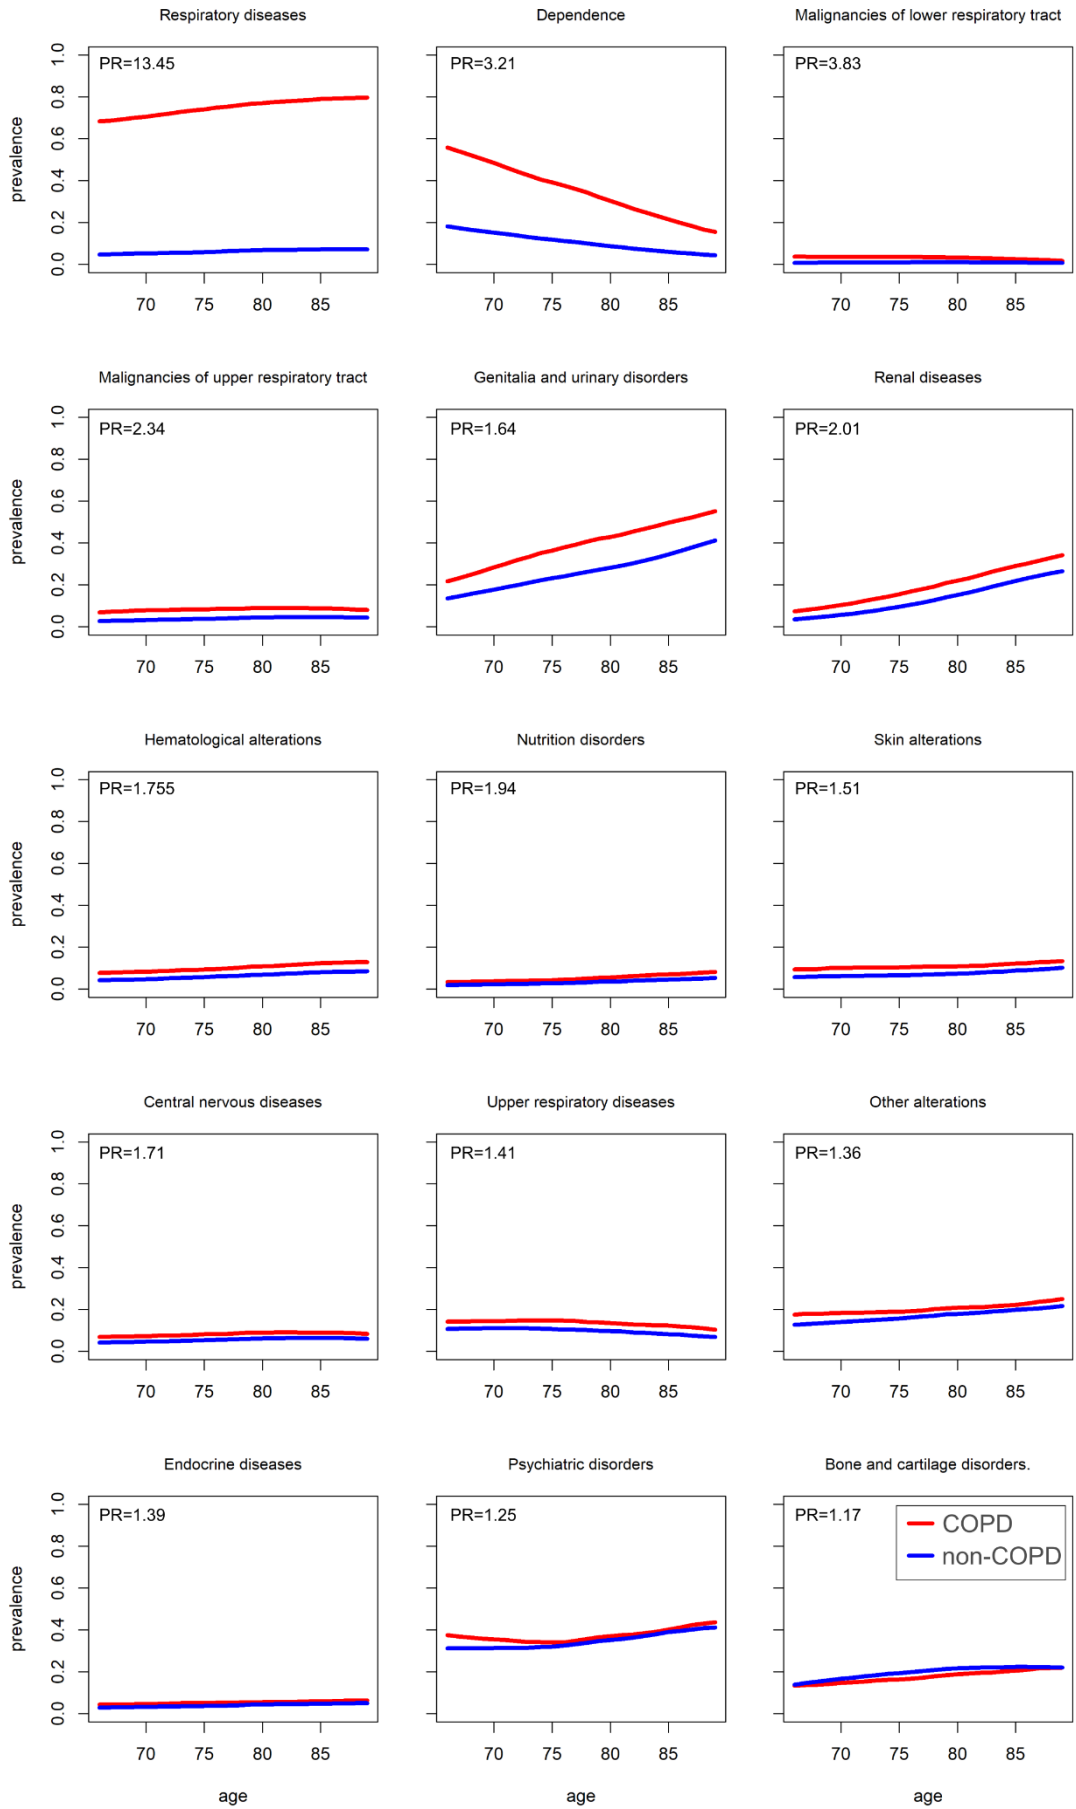

**Figure S2.** Comparison of the age-associated prevalence of the disease groups (DG) in COPD (red) and non-COPD patients (blue) in the CHSS. The order of the figures follows the combined rank of co-occurrence reported in Table S3 in the online supplementary file 2). Prevalence ratios (PR) comparing the mean prevalence of COPD with non-COPD between 65-90 ages are reported for each figure.

## Supplementary tables

**Table S1. ICD9 codes considered for the diagnosis of COPD.**

| <b>Code</b> | <b>Name</b>                                          |
|-------------|------------------------------------------------------|
| 491.2x      | Obstructive chronic bronchitis                       |
| 491.8       | Other chronic bronchitis                             |
| 491.9       | Unspecified chronic bronchitis                       |
| 492.x       | Emphysema                                            |
| 493.2x      | Chronic obstructive asthma                           |
| 494.x       | Bronchiectasis                                       |
| 496         | Chronic airway obstruction, not elsewhere classified |

**Table S2. ICD9 codes by disease groups and their descriptor.**

| Group ID | Group                | ICD9 code | Name                                                     |
|----------|----------------------|-----------|----------------------------------------------------------|
| DG1      | Respiratory diseases | 135       | Sarcoidosis                                              |
| DG1      | Respiratory diseases | 4150      | Acute cor pulmonale                                      |
| DG1      | Respiratory diseases | 41513     | Saddle embolus of pulmonary artery                       |
| DG1      | Respiratory diseases | 416       | Chronic pulmonary heart disease                          |
| DG1      | Respiratory diseases | 4160      | Primary pulmonary hypertension                           |
| DG1      | Respiratory diseases | 4161      | Kyphoscoliotic heart disease                             |
| DG1      | Respiratory diseases | 4162      | Chronic pulmonary embolism                               |
| DG1      | Respiratory diseases | 4168      | Other chronic pulmonary heart diseases                   |
| DG1      | Respiratory diseases | 4169      | Chronic pulmonary heart disease, unspecified             |
| DG1      | Respiratory diseases | 4170      | Arteriovenous fistula of pulmonary vessels               |
| DG1      | Respiratory diseases | 491       | Chronic bronchitis                                       |
| DG1      | Respiratory diseases | 4910      | Simple chronic bronchitis                                |
| DG1      | Respiratory diseases | 4911      | Mucopurulent chronic bronchitis                          |
| DG1      | Respiratory diseases | 4912      | Obstructive chronic bronchitis                           |
| DG1      | Respiratory diseases | 49120     | Obstructive chronic bronchitis without exacerbation      |
| DG1      | Respiratory diseases | 49121     | Obstructive chronic bronchitis with (acute) exacerbation |
| DG1      | Respiratory diseases | 49122     | Obstructive chronic bronchitis with acute bronchitis     |
| DG1      | Respiratory diseases | 4918      | Other chronic bronchitis                                 |
| DG1      | Respiratory diseases | 4919      | Unspecified chronic bronchitis                           |
| DG1      | Respiratory diseases | 492       | Emphysema                                                |
| DG1      | Respiratory diseases | 4920      | Emphysematous bleb                                       |
| DG1      | Respiratory diseases | 4928      | Other emphysema                                          |
| DG1      | Respiratory diseases | 493       | Asthma                                                   |
| DG1      | Respiratory diseases | 4930      | Extrinsic asthma                                         |
| DG1      | Respiratory diseases | 49300     | Extrinsic asthma, unspecified                            |
| DG1      | Respiratory diseases | 49301     | Extrinsic asthma with status asthmaticus                 |
| DG1      | Respiratory diseases | 49302     | Extrinsic asthma with (acute) exacerbation               |
| DG1      | Respiratory diseases | 4931      | Intrinsic asthma                                         |
| DG1      | Respiratory diseases | 49310     | Intrinsic asthma, unspecified                            |
| DG1      | Respiratory diseases | 49311     | Intrinsic asthma with status asthmaticus                 |
| DG1      | Respiratory diseases | 49312     | Intrinsic asthma with (acute) exacerbation               |
| DG1      | Respiratory diseases | 4932      | Chronic obstructive asthma                               |
| DG1      | Respiratory diseases | 49320     | Chronic obstructive asthma, unspecified                  |
| DG1      | Respiratory diseases | 49321     | Chronic obstructive asthma with status asthmaticus       |
| DG1      | Respiratory diseases | 49322     | Chronic obstructive asthma with (acute) exacerbation     |
| DG1      | Respiratory diseases | 4938      | Other forms of asthma                                    |
| DG1      | Respiratory diseases | 49381     | Exercise induced bronchospasm                            |
| DG1      | Respiratory diseases | 49382     | Cough variant asthma                                     |
| DG1      | Respiratory diseases | 4939      | Asthma, unspecified                                      |
| DG1      | Respiratory diseases | 49390     | Asthma, unspecified type, unspecified                    |
| DG1      | Respiratory diseases | 49391     | Asthma, unspecified type, with status asthmaticus        |
| DG1      | Respiratory diseases | 49392     | Asthma, unspecified type, with (acute) exacerbation      |

|     |                      |       |                                                             |
|-----|----------------------|-------|-------------------------------------------------------------|
| DG1 | Respiratory diseases | 494   | Bronchiectasis                                              |
| DG1 | Respiratory diseases | 4940  | Bronchiectasis without acute exacerbation                   |
| DG1 | Respiratory diseases | 4941  | Bronchiectasis with acute exacerbation                      |
| DG1 | Respiratory diseases | 495   | Extrinsic allergic alveolitis                               |
| DG1 | Respiratory diseases | 4950  | Farmers' lung                                               |
| DG1 | Respiratory diseases | 4951  | Bagassosis                                                  |
| DG1 | Respiratory diseases | 4952  | Bird-fanciers' lung                                         |
| DG1 | Respiratory diseases | 4953  | Suberosis                                                   |
| DG1 | Respiratory diseases | 4954  | Malt workers' lung                                          |
| DG1 | Respiratory diseases | 4955  | Mushroom workers' lung                                      |
| DG1 | Respiratory diseases | 4956  | Maple bark-strippers' lung                                  |
| DG1 | Respiratory diseases | 4957  | Ventilation pneumonitis                                     |
| DG1 | Respiratory diseases | 4958  | Other specified allergic alveolitis and pneumonitis         |
| DG1 | Respiratory diseases | 4959  | Unspecified allergic alveolitis and pneumonitis             |
| DG1 | Respiratory diseases | 500   | Coal workers' pneumoconiosis                                |
| DG1 | Respiratory diseases | 501   | Asbestosis                                                  |
| DG1 | Respiratory diseases | 502   | Pneumoconiosis due to other silica or silicates             |
| DG1 | Respiratory diseases | 503   | Pneumoconiosis due to other inorganic dust                  |
| DG1 | Respiratory diseases | 504   | Pneumonopathy due to inhalation of other dust               |
| DG1 | Respiratory diseases | 505   | Pneumoconiosis, unspecified                                 |
| DG1 | Respiratory diseases | 5064  | Chronic respiratory conditions due to fumes and vapors      |
| DG1 | Respiratory diseases | 5081  | Chronic and other pulmonary manifestations due to radiation |
| DG1 | Respiratory diseases | 51181 | Malignant pleural effusion                                  |
| DG1 | Respiratory diseases | 51284 | Other air leak                                              |
| DG1 | Respiratory diseases | 514   | Pulmonary congestion and hypostasis                         |
| DG1 | Respiratory diseases | 515   | Postinflammatory pulmonary fibrosis                         |
| DG1 | Respiratory diseases | 516   | Other alveolar and parietoalveolar pneumonopathy            |
| DG1 | Respiratory diseases | 5160  | Pulmonary alveolar proteinosis                              |
| DG1 | Respiratory diseases | 5161  | Idiopathic pulmonary hemosiderosis                          |
| DG1 | Respiratory diseases | 5162  | Pulmonary alveolar microlithiasis                           |
| DG1 | Respiratory diseases | 5163  | Idiopathic interstitial pneumonia                           |
| DG1 | Respiratory diseases | 51630 | Idiopathic interstitial pneumonia, not otherwise specified  |
| DG1 | Respiratory diseases | 51631 | Idiopathic pulmonary fibrosis                               |
| DG1 | Respiratory diseases | 51632 | Idiopathic non-specific interstitial pneumonitis            |
| DG1 | Respiratory diseases | 51633 | Acute interstitial pneumonitis                              |
| DG1 | Respiratory diseases | 51634 | Respiratory bronchiolitis interstitial lung disease         |
| DG1 | Respiratory diseases | 51635 | Idiopathic lymphoid interstitial pneumonia                  |
| DG1 | Respiratory diseases | 51636 | Cryptogenic organizing pneumonia                            |
| DG1 | Respiratory diseases | 51637 | Desquamative interstitial pneumonia                         |
| DG1 | Respiratory diseases | 5164  | Lymphangiomyomatosis                                        |
| DG1 | Respiratory diseases | 5165  | Adult pulmonary Langerhans cell histiocytosis               |
| DG1 | Respiratory diseases | 5166  | Interstitial lung diseases of childhood                     |
| DG1 | Respiratory diseases | 51661 | Neuroendocrine cell hyperplasia of infancy                  |
| DG1 | Respiratory diseases | 51662 | Pulmonary interstitial glycogenosis                         |
| DG1 | Respiratory diseases | 51663 | Surfactant mutations of the lung                            |



|     |                      |       |                                                                                                                                                          |
|-----|----------------------|-------|----------------------------------------------------------------------------------------------------------------------------------------------------------|
| DG1 | Respiratory diseases | 51664 | Alveolar capillary dysplasia with vein misalignment                                                                                                      |
| DG1 | Respiratory diseases | 51669 | Other interstitial lung diseases of childhood                                                                                                            |
| DG1 | Respiratory diseases | 5168  | Other specified alveolar and parietoalveolar pneumonopathies                                                                                             |
| DG1 | Respiratory diseases | 5169  | Unspecified alveolar and parietoalveolar pneumonopathy                                                                                                   |
| DG1 | Respiratory diseases | 5171  | Rheumatic pneumonia                                                                                                                                      |
| DG1 | Respiratory diseases | 5172  | Lung involvement in systemic sclerosis                                                                                                                   |
| DG1 | Respiratory diseases | 5178  | Lung involvement in other diseases classified elsewhere                                                                                                  |
| DG1 | Respiratory diseases | 51853 | Acute and chronic respiratory failure following trauma and surgery                                                                                       |
| DG1 | Respiratory diseases | 5186  | Allergic bronchopulmonary aspergillosis                                                                                                                  |
| DG1 | Respiratory diseases | 51883 | Chronic respiratory failure                                                                                                                              |
| DG1 | Respiratory diseases | 51884 | Acute and chronic respiratory failure                                                                                                                    |
| DG2 | Heart diseases       | 393   | Chronic rheumatic pericarditis                                                                                                                           |
| DG2 | Heart diseases       | 394   | Diseases of mitral valve                                                                                                                                 |
| DG2 | Heart diseases       | 3940  | Mitral stenosis                                                                                                                                          |
| DG2 | Heart diseases       | 3941  | Rheumatic mitral insufficiency                                                                                                                           |
| DG2 | Heart diseases       | 3942  | Mitral stenosis with insufficiency                                                                                                                       |
| DG2 | Heart diseases       | 3949  | Other and unspecified mitral valve diseases                                                                                                              |
| DG2 | Heart diseases       | 396   | Diseases of mitral and aortic valves                                                                                                                     |
| DG2 | Heart diseases       | 3960  | Mitral valve stenosis and aortic valve stenosis                                                                                                          |
| DG2 | Heart diseases       | 3961  | Mitral valve stenosis and aortic valve insufficiency                                                                                                     |
| DG2 | Heart diseases       | 3962  | Mitral valve insufficiency and aortic valve stenosis                                                                                                     |
| DG2 | Heart diseases       | 3963  | Mitral valve insufficiency and aortic valve insufficiency                                                                                                |
| DG2 | Heart diseases       | 3968  | Multiple involvement of mitral and aortic valves                                                                                                         |
| DG2 | Heart diseases       | 3969  | Mitral and aortic valve diseases, unspecified                                                                                                            |
| DG2 | Heart diseases       | 397   | Diseases of other endocardial structures                                                                                                                 |
| DG2 | Heart diseases       | 3970  | Diseases of tricuspid valve                                                                                                                              |
| DG2 | Heart diseases       | 3971  | Rheumatic diseases of pulmonary valve                                                                                                                    |
| DG2 | Heart diseases       | 3979  | Rheumatic diseases of endocardium, valve unspecified                                                                                                     |
| DG2 | Heart diseases       | 402   | Hypertensive heart disease                                                                                                                               |
| DG2 | Heart diseases       | 4020  | Malignant                                                                                                                                                |
| DG2 | Heart diseases       | 40200 | Malignant hypertensive heart disease without heart failure                                                                                               |
| DG2 | Heart diseases       | 40201 | Malignant hypertensive heart disease with heart failure                                                                                                  |
| DG2 | Heart diseases       | 4021  | Benign                                                                                                                                                   |
| DG2 | Heart diseases       | 40210 | Benign hypertensive heart disease without heart failure                                                                                                  |
| DG2 | Heart diseases       | 40211 | Benign hypertensive heart disease with heart failure                                                                                                     |
| DG2 | Heart diseases       | 4029  | Unspecified                                                                                                                                              |
| DG2 | Heart diseases       | 40290 | Unspecified hypertensive heart disease without heart failure                                                                                             |
| DG2 | Heart diseases       | 40291 | Unspecified hypertensive heart disease with heart failure                                                                                                |
| DG2 | Heart diseases       | 404   | Hypertensive heart and chronic kidney disease                                                                                                            |
| DG2 | Heart diseases       | 4040  | Malignant                                                                                                                                                |
| DG2 | Heart diseases       | 40400 | Hypertensive heart and chronic kidney disease, malignant, without heart failure and with chronic kidney disease stage I through stage IV, or unspecified |

|     |                |       |                                                                                                                                                            |
|-----|----------------|-------|------------------------------------------------------------------------------------------------------------------------------------------------------------|
| DG2 | Heart diseases | 40401 | Hypertensive heart and chronic kidney disease, malignant, with heart failure and with chronic kidney disease stage I through stage IV, or unspecified      |
| DG2 | Heart diseases | 40402 | Hypertensive heart and chronic kidney disease, malignant, without heart failure and with chronic kidney disease stage V or end stage renal disease         |
| DG2 | Heart diseases | 40403 | Hypertensive heart and chronic kidney disease, malignant, with heart failure and with chronic kidney disease stage V or end stage renal disease            |
| DG2 | Heart diseases | 4041  | Benign                                                                                                                                                     |
| DG2 | Heart diseases | 40410 | Hypertensive heart and chronic kidney disease, benign, without heart failure and with chronic kidney disease stage I through stage IV, or unspecified      |
| DG2 | Heart diseases | 40411 | Hypertensive heart and chronic kidney disease, benign, with heart failure and with chronic kidney disease stage I through stage IV, or unspecified         |
| DG2 | Heart diseases | 40412 | Hypertensive heart and chronic kidney disease, benign, without heart failure and with chronic kidney disease stage V or end stage renal disease            |
| DG2 | Heart diseases | 40413 | Hypertensive heart and chronic kidney disease, benign, with heart failure and chronic kidney disease stage V or end stage renal disease                    |
| DG2 | Heart diseases | 4049  | Unspecified                                                                                                                                                |
| DG2 | Heart diseases | 40490 | Hypertensive heart and chronic kidney disease, unspecified, without heart failure and with chronic kidney disease stage I through stage IV, or unspecified |
| DG2 | Heart diseases | 40491 | Hypertensive heart and chronic kidney disease, unspecified, with heart failure and with chronic kidney disease stage I through stage IV, or unspecified    |
| DG2 | Heart diseases | 40492 | Hypertensive heart and chronic kidney disease, unspecified, without heart failure and with chronic kidney disease stage V or end stage renal disease       |
| DG2 | Heart diseases | 40493 | Hypertensive heart and chronic kidney disease, unspecified, with heart failure and chronic kidney disease stage V or end stage renal disease               |
| DG2 | Heart diseases | 405   | Secondary hypertension                                                                                                                                     |
| DG2 | Heart diseases | 4050  | Malignant                                                                                                                                                  |
| DG2 | Heart diseases | 40501 | Malignant renovascular hypertension                                                                                                                        |
| DG2 | Heart diseases | 40509 | Other malignant secondary hypertension                                                                                                                     |
| DG2 | Heart diseases | 4051  | Benign                                                                                                                                                     |
| DG2 | Heart diseases | 40511 | Benign renovascular hypertension                                                                                                                           |
| DG2 | Heart diseases | 40519 | Other benign secondary hypertension                                                                                                                        |
| DG2 | Heart diseases | 4059  | Unspecified                                                                                                                                                |
| DG2 | Heart diseases | 40591 | Unspecified renovascular hypertension                                                                                                                      |
| DG2 | Heart diseases | 40599 | Other unspecified secondary hypertension                                                                                                                   |
| DG2 | Heart diseases | 410   | Acute myocardial infarction                                                                                                                                |
| DG2 | Heart diseases | 4100  | Of anterolateral wall                                                                                                                                      |
| DG2 | Heart diseases | 41000 | Acute myocardial infarction of anterolateral wall, episode of care unspecified                                                                             |

|     |                |       |                                                                                  |
|-----|----------------|-------|----------------------------------------------------------------------------------|
| DG2 | Heart diseases | 41001 | Acute myocardial infarction of anterolateral wall, initial episode of care       |
| DG2 | Heart diseases | 41002 | Acute myocardial infarction of anterolateral wall, subsequent episode of care    |
| DG2 | Heart diseases | 4101  | Of other anterior wall                                                           |
| DG2 | Heart diseases | 41010 | Acute myocardial infarction of other anterior wall, episode of care unspecified  |
| DG2 | Heart diseases | 41011 | Acute myocardial infarction of other anterior wall, initial episode of care      |
| DG2 | Heart diseases | 41012 | Acute myocardial infarction of other anterior wall, subsequent episode of care   |
| DG2 | Heart diseases | 4102  | Of inferolateral wall                                                            |
| DG2 | Heart diseases | 41020 | Acute myocardial infarction of inferolateral wall, episode of care unspecified   |
| DG2 | Heart diseases | 41021 | Acute myocardial infarction of inferolateral wall, initial episode of care       |
| DG2 | Heart diseases | 41022 | Acute myocardial infarction of inferolateral wall, subsequent episode of care    |
| DG2 | Heart diseases | 4103  | Of inferoposterior wall                                                          |
| DG2 | Heart diseases | 41030 | Acute myocardial infarction of inferoposterior wall, episode of care unspecified |
| DG2 | Heart diseases | 41031 | Acute myocardial infarction of inferoposterior wall, initial episode of care     |
| DG2 | Heart diseases | 41032 | Acute myocardial infarction of inferoposterior wall, subsequent episode of care  |
| DG2 | Heart diseases | 4104  | Of other inferior wall                                                           |
| DG2 | Heart diseases | 41040 | Acute myocardial infarction of other inferior wall, episode of care unspecified  |
| DG2 | Heart diseases | 41041 | Acute myocardial infarction of other inferior wall, initial episode of care      |
| DG2 | Heart diseases | 41042 | Acute myocardial infarction of other inferior wall, subsequent episode of care   |
| DG2 | Heart diseases | 4105  | Of other lateral wall                                                            |
| DG2 | Heart diseases | 41050 | Acute myocardial infarction of other lateral wall, episode of care unspecified   |
| DG2 | Heart diseases | 41051 | Acute myocardial infarction of other lateral wall, initial episode of care       |
| DG2 | Heart diseases | 41052 | Acute myocardial infarction of other lateral wall, subsequent episode of care    |
| DG2 | Heart diseases | 4106  | True posterior wall infarction                                                   |
| DG2 | Heart diseases | 41060 | True posterior wall infarction, episode of care unspecified                      |
| DG2 | Heart diseases | 41061 | True posterior wall infarction, initial episode of care                          |
| DG2 | Heart diseases | 41062 | True posterior wall infarction, subsequent episode of care                       |
| DG2 | Heart diseases | 4107  | Subendocardial infarction                                                        |
| DG2 | Heart diseases | 41070 | Subendocardial infarction, episode of care unspecified                           |
| DG2 | Heart diseases | 41071 | Subendocardial infarction, initial episode of care                               |
| DG2 | Heart diseases | 41072 | Subendocardial infarction, subsequent episode of care                            |
| DG2 | Heart diseases | 4108  | Of other specified sites                                                         |

|     |                |       |                                                                                   |
|-----|----------------|-------|-----------------------------------------------------------------------------------|
| DG2 | Heart diseases | 41080 | Acute myocardial infarction of other specified sites, episode of care unspecified |
| DG2 | Heart diseases | 41081 | Acute myocardial infarction of other specified sites, initial episode of care     |
| DG2 | Heart diseases | 41082 | Acute myocardial infarction of other specified sites, subsequent episode of care  |
| DG2 | Heart diseases | 4109  | Unspecified site                                                                  |
| DG2 | Heart diseases | 41090 | Acute myocardial infarction of unspecified site, episode of care unspecified      |
| DG2 | Heart diseases | 41091 | Acute myocardial infarction of unspecified site, initial episode of care          |
| DG2 | Heart diseases | 41092 | Acute myocardial infarction of unspecified site, subsequent episode of care       |
| DG2 | Heart diseases | 411   | Other acute and subacute forms of ischemic heart disease                          |
| DG2 | Heart diseases | 4110  | Postmyocardial infarction syndrome                                                |
| DG2 | Heart diseases | 4111  | Intermediate coronary syndrome                                                    |
| DG2 | Heart diseases | 4118  | Other                                                                             |
| DG2 | Heart diseases | 41181 | Acute coronary occlusion without myocardial infarction                            |
| DG2 | Heart diseases | 41189 | Other acute and subacute forms of ischemic heart disease, other                   |
| DG2 | Heart diseases | 412   | Old myocardial infarction                                                         |
| DG2 | Heart diseases | 413   | Angina pectoris                                                                   |
| DG2 | Heart diseases | 4130  | Angina decubitus                                                                  |
| DG2 | Heart diseases | 4131  | Prinzmetal angina                                                                 |
| DG2 | Heart diseases | 4139  | Other and unspecified angina pectoris                                             |
| DG2 | Heart diseases | 414   | Other forms of chronic ischemic heart disease                                     |
| DG2 | Heart diseases | 4140  | Coronary atherosclerosis                                                          |
| DG2 | Heart diseases | 41400 | Coronary atherosclerosis of unspecified type of vessel, native or graft           |
| DG2 | Heart diseases | 41401 | Coronary atherosclerosis of native coronary artery                                |
| DG2 | Heart diseases | 41402 | Coronary atherosclerosis of autologous vein bypass graft                          |
| DG2 | Heart diseases | 41403 | Coronary atherosclerosis of nonautologous biological bypass graft                 |
| DG2 | Heart diseases | 41404 | Coronary atherosclerosis of artery bypass graft                                   |
| DG2 | Heart diseases | 41405 | Coronary atherosclerosis of unspecified bypass graft                              |
| DG2 | Heart diseases | 41406 | Coronary atherosclerosis of native coronary artery of transplanted heart          |
| DG2 | Heart diseases | 41407 | Coronary atherosclerosis of bypass graft (artery) (vein) of transplanted heart    |
| DG2 | Heart diseases | 4141  | Aneurysm and dissection of heart                                                  |
| DG2 | Heart diseases | 41410 | Aneurysm of heart (wall)                                                          |
| DG2 | Heart diseases | 41411 | Aneurysm of coronary vessels                                                      |
| DG2 | Heart diseases | 41412 | Dissection of coronary artery                                                     |
| DG2 | Heart diseases | 41419 | Other aneurysm of heart                                                           |
| DG2 | Heart diseases | 4142  | Chronic total occlusion of coronary artery                                        |
| DG2 | Heart diseases | 4143  | Coronary atherosclerosis due to lipid rich plaque                                 |
| DG2 | Heart diseases | 4144  | Coronary atherosclerosis due to calcified coronary lesion                         |
| DG2 | Heart diseases | 4148  | Other specified forms of chronic ischemic heart disease                           |

|     |                |       |                                                               |
|-----|----------------|-------|---------------------------------------------------------------|
| DG2 | Heart diseases | 4149  | Chronic ischemic heart disease, unspecified                   |
| DG2 | Heart diseases | 4231  | Adhesive pericarditis                                         |
| DG2 | Heart diseases | 4232  | Constrictive pericarditis                                     |
| DG2 | Heart diseases | 424   | Other diseases of endocardium                                 |
| DG2 | Heart diseases | 4240  | Mitral valve disorders                                        |
| DG2 | Heart diseases | 4241  | Aortic valve disorders                                        |
| DG2 | Heart diseases | 4242  | Tricuspid valve disorders, specified as nonrheumatic          |
| DG2 | Heart diseases | 4243  | Pulmonary valve disorders                                     |
| DG2 | Heart diseases | 4249  | Endocarditis, valve unspecified                               |
| DG2 | Heart diseases | 42490 | Endocarditis, valve unspecified, unspecified cause            |
| DG2 | Heart diseases | 42491 | Endocarditis in diseases classified elsewhere                 |
| DG2 | Heart diseases | 42499 | Other endocarditis, valve unspecified                         |
| DG2 | Heart diseases | 425   | Cardiomyopathy                                                |
| DG2 | Heart diseases | 4250  | Endomyocardial fibrosis                                       |
| DG2 | Heart diseases | 4251  | Hypertrophic cardiomyopathy                                   |
| DG2 | Heart diseases | 42511 | Hypertrophic obstructive cardiomyopathy                       |
| DG2 | Heart diseases | 42518 | Other hypertrophic cardiomyopathy                             |
| DG2 | Heart diseases | 4252  | Obscure cardiomyopathy of Africa                              |
| DG2 | Heart diseases | 4253  | Endocardial fibroelastosis                                    |
| DG2 | Heart diseases | 4254  | Other primary cardiomyopathies                                |
| DG2 | Heart diseases | 4255  | Alcoholic cardiomyopathy                                      |
| DG2 | Heart diseases | 4257  | Nutritional and metabolic cardiomyopathy                      |
| DG2 | Heart diseases | 4258  | Cardiomyopathy in other diseases classified elsewhere         |
| DG2 | Heart diseases | 4259  | Secondary cardiomyopathy, unspecified                         |
| DG2 | Heart diseases | 426   | Conduction disorders                                          |
| DG2 | Heart diseases | 4260  | Atrioventricular block, complete                              |
| DG2 | Heart diseases | 4261  | Atrioventricular block, other and unspecified                 |
| DG2 | Heart diseases | 42610 | Atrioventricular block, unspecified                           |
| DG2 | Heart diseases | 42611 | First degree atrioventricular block                           |
| DG2 | Heart diseases | 42612 | Mobitz (type) II atrioventricular block                       |
| DG2 | Heart diseases | 42613 | Other second degree atrioventricular block                    |
| DG2 | Heart diseases | 4262  | Left bundle branch hemiblock                                  |
| DG2 | Heart diseases | 4263  | Other left bundle branch block                                |
| DG2 | Heart diseases | 4264  | Right bundle branch block                                     |
| DG2 | Heart diseases | 4265  | Bundle branch block, other and unspecified                    |
| DG2 | Heart diseases | 42650 | Bundle branch block, unspecified                              |
| DG2 | Heart diseases | 42651 | Right bundle branch block and left posterior fascicular block |
| DG2 | Heart diseases | 42652 | Right bundle branch block and left anterior fascicular block  |
| DG2 | Heart diseases | 42653 | Other bilateral bundle branch block                           |
| DG2 | Heart diseases | 42654 | Trifascicular block                                           |
| DG2 | Heart diseases | 4266  | Other heart block                                             |
| DG2 | Heart diseases | 4267  | Anomalous atrioventricular excitation                         |
| DG2 | Heart diseases | 4268  | Other specified conduction disorders                          |
| DG2 | Heart diseases | 42681 | Lown-Ganong-Levine syndrome                                   |
| DG2 | Heart diseases | 42682 | Long QT syndrome                                              |
| DG2 | Heart diseases | 42689 | Other specified conduction disorders                          |

|     |                |       |                                                                |
|-----|----------------|-------|----------------------------------------------------------------|
| DG2 | Heart diseases | 4269  | Conduction disorder, unspecified                               |
| DG2 | Heart diseases | 427   | Cardiac dysrhythmias                                           |
| DG2 | Heart diseases | 4270  | Paroxysmal supraventricular tachycardia                        |
| DG2 | Heart diseases | 4271  | Paroxysmal ventricular tachycardia                             |
| DG2 | Heart diseases | 4272  | Paroxysmal tachycardia, unspecified                            |
| DG2 | Heart diseases | 4273  | Atrial fibrillation and flutter                                |
| DG2 | Heart diseases | 42731 | Atrial fibrillation                                            |
| DG2 | Heart diseases | 42732 | Atrial flutter                                                 |
| DG2 | Heart diseases | 4274  | Ventricular fibrillation and flutter                           |
| DG2 | Heart diseases | 42741 | Ventricular fibrillation                                       |
| DG2 | Heart diseases | 42742 | Ventricular flutter                                            |
| DG2 | Heart diseases | 4275  | Cardiac arrest                                                 |
| DG2 | Heart diseases | 4276  | Premature beats                                                |
| DG2 | Heart diseases | 42760 | Premature beats, unspecified                                   |
| DG2 | Heart diseases | 42761 | Supraventricular premature beats                               |
| DG2 | Heart diseases | 42769 | Other premature beats                                          |
| DG2 | Heart diseases | 4278  | Other specified cardiac dysrhythmias                           |
| DG2 | Heart diseases | 42781 | Sinoatrial node dysfunction                                    |
| DG2 | Heart diseases | 42789 | Other specified cardiac dysrhythmias                           |
| DG2 | Heart diseases | 4279  | Cardiac dysrhythmia, unspecified                               |
| DG2 | Heart diseases | 428   | Heart failure                                                  |
| DG2 | Heart diseases | 4280  | Congestive heart failure, unspecified                          |
| DG2 | Heart diseases | 4281  | Left heart failure                                             |
| DG2 | Heart diseases | 4282  | Systolic heart failure                                         |
| DG2 | Heart diseases | 42820 | Systolic heart failure, unspecified                            |
| DG2 | Heart diseases | 42821 | Acute systolic heart failure                                   |
| DG2 | Heart diseases | 42822 | Chronic systolic heart failure                                 |
| DG2 | Heart diseases | 42823 | Acute on chronic systolic heart failure                        |
| DG2 | Heart diseases | 4283  | Diastolic heart failure                                        |
| DG2 | Heart diseases | 42830 | Diastolic heart failure, unspecified                           |
| DG2 | Heart diseases | 42831 | Acute diastolic heart failure                                  |
| DG2 | Heart diseases | 42832 | Chronic diastolic heart failure                                |
| DG2 | Heart diseases | 42833 | Acute on chronic diastolic heart failure                       |
| DG2 | Heart diseases | 4284  | Combined systolic and diastolic heart failure                  |
| DG2 | Heart diseases | 42840 | Combined systolic and diastolic heart failure, unspecified     |
| DG2 | Heart diseases | 42841 | Acute combined systolic and diastolic heart failure            |
| DG2 | Heart diseases | 42842 | Chronic combined systolic and diastolic heart failure          |
| DG2 | Heart diseases | 42843 | Acute on chronic combined systolic and diastolic heart failure |
| DG2 | Heart diseases | 4289  | Heart failure, unspecified                                     |
| DG2 | Heart diseases | 429   | Ill-defined descriptions and complications of heart disease    |
| DG2 | Heart diseases | 4290  | Myocarditis, unspecified                                       |
| DG2 | Heart diseases | 4291  | Myocardial degeneration                                        |
| DG2 | Heart diseases | 4292  | Cardiovascular disease, unspecified                            |
| DG2 | Heart diseases | 4293  | Cardiomegaly                                                   |
| DG2 | Heart diseases | 4294  | Functional disturbances following cardiac surgery              |

|     |                                         |       |                                                                                      |
|-----|-----------------------------------------|-------|--------------------------------------------------------------------------------------|
| DG2 | Heart diseases                          | 4295  | Rupture of chordae tendineae                                                         |
| DG2 | Heart diseases                          | 4296  | Rupture of papillary muscle                                                          |
| DG2 | Heart diseases                          | 4297  | Certain sequelae of myocardial infarction, not elsewhere classified                  |
| DG2 | Heart diseases                          | 42971 | Acquired cardiac septal defect                                                       |
| DG2 | Heart diseases                          | 42979 | Certain sequelae of myocardial infarction, not elsewhere classified, other           |
| DG2 | Heart diseases                          | 4298  | Other ill-defined heart diseases                                                     |
| DG2 | Heart diseases                          | 42981 | Other disorders of papillary muscle                                                  |
| DG2 | Heart diseases                          | 42982 | Hyperkinetic heart disease                                                           |
| DG2 | Heart diseases                          | 42983 | Takotsubo syndrome                                                                   |
| DG2 | Heart diseases                          | 42989 | Other ill-defined heart diseases                                                     |
| DG2 | Heart diseases                          | 4299  | Heart disease, unspecified                                                           |
| DG2 | Heart diseases                          | 440   | Atherosclerosis                                                                      |
| DG2 | Heart diseases                          | 4400  | Atherosclerosis of aorta                                                             |
| DG2 | Heart diseases                          | 4401  | Atherosclerosis of renal artery                                                      |
| DG2 | Heart diseases                          | 4402  | Of native arteries of the extremities                                                |
| DG2 | Heart diseases                          | 44020 | Atherosclerosis of native arteries of the extremities, unspecified                   |
| DG2 | Heart diseases                          | 44021 | Atherosclerosis of native arteries of the extremities with intermittent claudication |
| DG2 | Heart diseases                          | 44022 | Atherosclerosis of native arteries of the extremities with rest pain                 |
| DG2 | Heart diseases                          | 44023 | Atherosclerosis of native arteries of the extremities with ulceration                |
| DG2 | Heart diseases                          | 44024 | Atherosclerosis of native arteries of the extremities with gangrene                  |
| DG2 | Heart diseases                          | 44029 | Other atherosclerosis of native arteries of the extremities                          |
| DG2 | Heart diseases                          | 4403  | Of bypass graft of the extremities                                                   |
| DG2 | Heart diseases                          | 44030 | Atherosclerosis of unspecified bypass graft of the extremities                       |
| DG2 | Heart diseases                          | 44031 | Atherosclerosis of autologous vein bypass graft of the extremities                   |
| DG2 | Heart diseases                          | 44032 | Atherosclerosis of nonautologous biological bypass graft of the extremities          |
| DG2 | Heart diseases                          | 4404  | Chronic total occlusion of artery of the extremities                                 |
| DG2 | Heart diseases                          | 4408  | Atherosclerosis of other specified arteries                                          |
| DG2 | Heart diseases                          | 4409  | Generalized and unspecified atherosclerosis                                          |
| DG4 | Malignancies of upper respiratory tract | 140   | Malignant neoplasm of lip                                                            |
| DG4 | Malignancies of upper respiratory tract | 1400  | Malignant neoplasm of upper lip, vermilion border                                    |
| DG4 | Malignancies of upper respiratory tract | 1401  | Malignant neoplasm of lower lip, vermilion border                                    |
| DG4 | Malignancies of upper respiratory tract | 1403  | Malignant neoplasm of upper lip, inner aspect                                        |
| DG4 | Malignancies of upper respiratory tract | 1404  | Malignant neoplasm of lower lip, inner aspect                                        |

|     |                                         |      |                                                                       |
|-----|-----------------------------------------|------|-----------------------------------------------------------------------|
| DG4 | Malignancies of upper respiratory tract | 1405 | Malignant neoplasm of lip, unspecified, inner aspect                  |
| DG4 | Malignancies of upper respiratory tract | 1406 | Malignant neoplasm of commissure of lip                               |
| DG4 | Malignancies of upper respiratory tract | 1408 | Malignant neoplasm of other sites of lip                              |
| DG4 | Malignancies of upper respiratory tract | 1409 | Malignant neoplasm of lip, unspecified, vermilion border              |
| DG4 | Malignancies of upper respiratory tract | 141  | Malignant neoplasm of tongue                                          |
| DG4 | Malignancies of upper respiratory tract | 1410 | Malignant neoplasm of base of tongue                                  |
| DG4 | Malignancies of upper respiratory tract | 1411 | Malignant neoplasm of dorsal surface of tongue                        |
| DG4 | Malignancies of upper respiratory tract | 1412 | Malignant neoplasm of tip and lateral border of tongue                |
| DG4 | Malignancies of upper respiratory tract | 1413 | Malignant neoplasm of ventral surface of tongue                       |
| DG4 | Malignancies of upper respiratory tract | 1414 | Malignant neoplasm of anterior two-thirds of tongue, part unspecified |
| DG4 | Malignancies of upper respiratory tract | 1415 | Malignant neoplasm of junctional zone of tongue                       |
| DG4 | Malignancies of upper respiratory tract | 1416 | Malignant neoplasm of lingual tonsil                                  |
| DG4 | Malignancies of upper respiratory tract | 1418 | Malignant neoplasm of other sites of tongue                           |
| DG4 | Malignancies of upper respiratory tract | 1419 | Malignant neoplasm of tongue, unspecified                             |
| DG4 | Malignancies of upper respiratory tract | 144  | Malignant neoplasm of floor of mouth                                  |
| DG4 | Malignancies of upper respiratory tract | 1440 | Malignant neoplasm of anterior portion of floor of mouth              |
| DG4 | Malignancies of upper respiratory tract | 1441 | Malignant neoplasm of lateral portion of floor of mouth               |
| DG4 | Malignancies of upper respiratory tract | 1448 | Malignant neoplasm of other sites of floor of mouth                   |
| DG4 | Malignancies of upper respiratory tract | 1449 | Malignant neoplasm of floor of mouth, part unspecified                |
| DG4 | Malignancies of upper respiratory tract | 145  | Malignant neoplasm of other and unspecified parts of mouth            |
| DG4 | Malignancies of upper respiratory tract | 1450 | Malignant neoplasm of cheek mucosa                                    |
| DG4 | Malignancies of upper respiratory tract | 1451 | Malignant neoplasm of vestibule of mouth                              |
| DG4 | Malignancies of upper respiratory tract | 1452 | Malignant neoplasm of hard palate                                     |
| DG4 | Malignancies of upper respiratory tract | 1453 | Malignant neoplasm of soft palate                                     |
| DG4 | Malignancies of upper respiratory tract | 1454 | Malignant neoplasm of uvula                                           |



|     |                                         |      |                                                                |
|-----|-----------------------------------------|------|----------------------------------------------------------------|
| DG4 | Malignancies of upper respiratory tract | 1455 | Malignant neoplasm of palate, unspecified                      |
| DG4 | Malignancies of upper respiratory tract | 1456 | Malignant neoplasm of retromolar area                          |
| DG4 | Malignancies of upper respiratory tract | 1458 | Malignant neoplasm of other specified parts of mouth           |
| DG4 | Malignancies of upper respiratory tract | 1459 | Malignant neoplasm of mouth, unspecified                       |
| DG4 | Malignancies of upper respiratory tract | 146  | Malignant neoplasm of oropharynx                               |
| DG4 | Malignancies of upper respiratory tract | 1460 | Malignant neoplasm of tonsil                                   |
| DG4 | Malignancies of upper respiratory tract | 1461 | Malignant neoplasm of tonsillar fossa                          |
| DG4 | Malignancies of upper respiratory tract | 1462 | Malignant neoplasm of tonsillar pillars (anterior) (posterior) |
| DG4 | Malignancies of upper respiratory tract | 1463 | Malignant neoplasm of vallecula epiglottica                    |
| DG4 | Malignancies of upper respiratory tract | 1464 | Malignant neoplasm of anterior aspect of epiglottis            |
| DG4 | Malignancies of upper respiratory tract | 1465 | Malignant neoplasm of junctional region of oropharynx          |
| DG4 | Malignancies of upper respiratory tract | 1466 | Malignant neoplasm of lateral wall of oropharynx               |
| DG4 | Malignancies of upper respiratory tract | 1467 | Malignant neoplasm of posterior wall of oropharynx             |
| DG4 | Malignancies of upper respiratory tract | 1468 | Malignant neoplasm of other specified sites of oropharynx      |
| DG4 | Malignancies of upper respiratory tract | 1469 | Malignant neoplasm of oropharynx, unspecified site             |
| DG4 | Malignancies of upper respiratory tract | 147  | Malignant neoplasm of nasopharynx                              |
| DG4 | Malignancies of upper respiratory tract | 1470 | Malignant neoplasm of superior wall of nasopharynx             |
| DG4 | Malignancies of upper respiratory tract | 1471 | Malignant neoplasm of posterior wall of nasopharynx            |
| DG4 | Malignancies of upper respiratory tract | 1472 | Malignant neoplasm of lateral wall of nasopharynx              |
| DG4 | Malignancies of upper respiratory tract | 1473 | Malignant neoplasm of anterior wall of nasopharynx             |
| DG4 | Malignancies of upper respiratory tract | 1478 | Malignant neoplasm of other specified sites of nasopharynx     |
| DG4 | Malignancies of upper respiratory tract | 1479 | Malignant neoplasm of nasopharynx, unspecified site            |
| DG4 | Malignancies of upper respiratory tract | 148  | Malignant neoplasm of hypopharynx                              |
| DG4 | Malignancies of upper respiratory tract | 1480 | Malignant neoplasm of postcricoid region of hypopharynx        |
| DG4 | Malignancies of upper respiratory tract | 1481 | Malignant neoplasm of pyriform sinus                           |

|     |                                         |      |                                                                                            |
|-----|-----------------------------------------|------|--------------------------------------------------------------------------------------------|
| DG4 | Malignancies of upper respiratory tract | 1482 | Malignant neoplasm of aryepiglottic fold, hypopharyngeal aspect                            |
| DG4 | Malignancies of upper respiratory tract | 1483 | Malignant neoplasm of posterior hypopharyngeal wall                                        |
| DG4 | Malignancies of upper respiratory tract | 1488 | Malignant neoplasm of other specified sites of hypopharynx                                 |
| DG4 | Malignancies of upper respiratory tract | 1489 | Malignant neoplasm of hypopharynx, unspecified site                                        |
| DG4 | Malignancies of upper respiratory tract | 149  | Malignant neoplasm of other and ill-defined sites within the lip, oral cavity, and pharynx |
| DG4 | Malignancies of upper respiratory tract | 1490 | Malignant neoplasm of pharynx, unspecified                                                 |
| DG4 | Malignancies of upper respiratory tract | 1491 | Malignant neoplasm of waldeyer's ring                                                      |
| DG4 | Malignancies of upper respiratory tract | 1498 | Malignant neoplasm of other sites within the lip and oral cavity                           |
| DG4 | Malignancies of upper respiratory tract | 1499 | Malignant neoplasm of ill-defined sites within the lip and oral cavity                     |
| DG4 | Malignancies of upper respiratory tract | 150  | Malignant neoplasm of esophagus                                                            |
| DG4 | Malignancies of upper respiratory tract | 1500 | Malignant neoplasm of cervical esophagus                                                   |
| DG4 | Malignancies of upper respiratory tract | 1501 | Malignant neoplasm of thoracic esophagus                                                   |
| DG4 | Malignancies of upper respiratory tract | 1502 | Malignant neoplasm of abdominal esophagus                                                  |
| DG4 | Malignancies of upper respiratory tract | 1503 | Malignant neoplasm of upper third of esophagus                                             |
| DG4 | Malignancies of upper respiratory tract | 1504 | Malignant neoplasm of middle third of esophagus                                            |
| DG4 | Malignancies of upper respiratory tract | 1505 | Malignant neoplasm of lower third of esophagus                                             |
| DG4 | Malignancies of upper respiratory tract | 1508 | Malignant neoplasm of other specified part of esophagus                                    |
| DG4 | Malignancies of upper respiratory tract | 1509 | Malignant neoplasm of esophagus, unspecified site                                          |
| DG4 | Malignancies of upper respiratory tract | 151  | Malignant neoplasm of stomach                                                              |
| DG4 | Malignancies of upper respiratory tract | 1510 | Malignant neoplasm of cardia                                                               |
| DG4 | Malignancies of upper respiratory tract | 1511 | Malignant neoplasm of pylorus                                                              |
| DG4 | Malignancies of upper respiratory tract | 1512 | Malignant neoplasm of pyloric antrum                                                       |
| DG4 | Malignancies of upper respiratory tract | 1513 | Malignant neoplasm of fundus of stomach                                                    |
| DG4 | Malignancies of upper respiratory tract | 1514 | Malignant neoplasm of body of stomach                                                      |
| DG4 | Malignancies of upper respiratory tract | 1515 | Malignant neoplasm of lesser curvature of stomach, unspecified                             |

|     |                                         |      |                                                                                              |
|-----|-----------------------------------------|------|----------------------------------------------------------------------------------------------|
| DG4 | Malignancies of upper respiratory tract | 1516 | Malignant neoplasm of greater curvature of stomach, unspecified                              |
| DG4 | Malignancies of upper respiratory tract | 1518 | Malignant neoplasm of other specified sites of stomach                                       |
| DG4 | Malignancies of upper respiratory tract | 1519 | Malignant neoplasm of stomach, unspecified site                                              |
| DG4 | Malignancies of upper respiratory tract | 159  | Malignant neoplasm of other and ill-defined sites within the digestive organs and peritoneum |
| DG4 | Malignancies of upper respiratory tract | 1590 | Malignant neoplasm of intestinal tract, part unspecified                                     |
| DG4 | Malignancies of upper respiratory tract | 1591 | Malignant neoplasm of spleen, not elsewhere classified                                       |
| DG4 | Malignancies of upper respiratory tract | 1598 | Malignant neoplasm of other sites of digestive system and intra-abdominal organs             |
| DG4 | Malignancies of upper respiratory tract | 1599 | Malignant neoplasm of ill-defined sites within the digestive organs and peritoneum           |
| DG4 | Malignancies of upper respiratory tract | 161  | Malignant neoplasm of larynx                                                                 |
| DG4 | Malignancies of upper respiratory tract | 1610 | Malignant neoplasm of glottis                                                                |
| DG4 | Malignancies of upper respiratory tract | 1611 | Malignant neoplasm of supraglottis                                                           |
| DG4 | Malignancies of upper respiratory tract | 1612 | Malignant neoplasm of subglottis                                                             |
| DG4 | Malignancies of upper respiratory tract | 1613 | Malignant neoplasm of laryngeal cartilages                                                   |
| DG4 | Malignancies of upper respiratory tract | 1618 | Malignant neoplasm of other specified sites of larynx                                        |
| DG4 | Malignancies of upper respiratory tract | 1619 | Malignant neoplasm of larynx, unspecified                                                    |
| DG4 | Malignancies of upper respiratory tract | 164  | Malignant neoplasm of thymus, heart, and mediastinum                                         |
| DG4 | Malignancies of upper respiratory tract | 1640 | Malignant neoplasm of thymus                                                                 |
| DG4 | Malignancies of upper respiratory tract | 1641 | Malignant neoplasm of heart                                                                  |
| DG4 | Malignancies of upper respiratory tract | 1642 | Malignant neoplasm of anterior mediastinum                                                   |
| DG4 | Malignancies of upper respiratory tract | 1643 | Malignant neoplasm of posterior mediastinum                                                  |
| DG4 | Malignancies of upper respiratory tract | 1648 | Malignant neoplasm of other parts of mediastinum                                             |
| DG4 | Malignancies of upper respiratory tract | 1649 | Malignant neoplasm of mediastinum, part unspecified                                          |
| DG4 | Malignancies of upper respiratory tract | 170  | Malignant neoplasm of bone and articular cartilage                                           |
| DG4 | Malignancies of upper respiratory tract | 1700 | Malignant neoplasm of bones of skull and face, except mandible                               |
| DG4 | Malignancies of upper respiratory tract | 1701 | Malignant neoplasm of mandible                                                               |

|     |                                         |      |                                                                      |
|-----|-----------------------------------------|------|----------------------------------------------------------------------|
| DG4 | Malignancies of upper respiratory tract | 1702 | Malignant neoplasm of vertebral column, excluding sacrum and coccyx  |
| DG4 | Malignancies of upper respiratory tract | 1703 | Malignant neoplasm of ribs, sternum, and clavicle                    |
| DG4 | Malignancies of upper respiratory tract | 1704 | Malignant neoplasm of scapula and long bones of upper limb           |
| DG4 | Malignancies of upper respiratory tract | 1705 | Malignant neoplasm of short bones of upper limb                      |
| DG4 | Malignancies of upper respiratory tract | 1706 | Malignant neoplasm of pelvic bones, sacrum, and coccyx               |
| DG4 | Malignancies of upper respiratory tract | 1707 | Malignant neoplasm of long bones of lower limb                       |
| DG4 | Malignancies of upper respiratory tract | 1708 | Malignant neoplasm of short bones of lower limb                      |
| DG4 | Malignancies of upper respiratory tract | 1709 | Malignant neoplasm of bone and articular cartilage, site unspecified |
| DG4 | Malignancies of upper respiratory tract | 176  | Kaposi's sarcoma                                                     |
| DG4 | Malignancies of upper respiratory tract | 1760 | Kaposi's sarcoma, skin                                               |
| DG4 | Malignancies of upper respiratory tract | 1761 | Kaposi's sarcoma, soft tissue                                        |
| DG4 | Malignancies of upper respiratory tract | 1762 | Kaposi's sarcoma, palate                                             |
| DG4 | Malignancies of upper respiratory tract | 1763 | Kaposi's sarcoma, gastrointestinal sites                             |
| DG4 | Malignancies of upper respiratory tract | 1764 | Kaposi's sarcoma, lung                                               |
| DG4 | Malignancies of upper respiratory tract | 1765 | Kaposi's sarcoma, lymph nodes                                        |
| DG4 | Malignancies of upper respiratory tract | 1768 | Kaposi's sarcoma, other specified sites                              |
| DG4 | Malignancies of upper respiratory tract | 1769 | Kaposi's sarcoma, unspecified site                                   |
| DG4 | Malignancies of upper respiratory tract | 186  | Malignant neoplasm of testis                                         |
| DG4 | Malignancies of upper respiratory tract | 1860 | Malignant neoplasm of undescended testis                             |
| DG4 | Malignancies of upper respiratory tract | 1869 | Malignant neoplasm of other and unspecified testis                   |
| DG4 | Malignancies of upper respiratory tract | 187  | Malignant neoplasm of penis and other male genital organs            |
| DG4 | Malignancies of upper respiratory tract | 1871 | Malignant neoplasm of prepuce                                        |
| DG4 | Malignancies of upper respiratory tract | 1872 | Malignant neoplasm of glans penis                                    |
| DG4 | Malignancies of upper respiratory tract | 1873 | Malignant neoplasm of body of penis                                  |
| DG4 | Malignancies of upper respiratory tract | 1874 | Malignant neoplasm of penis, part unspecified                        |

|     |                                         |      |                                                                       |
|-----|-----------------------------------------|------|-----------------------------------------------------------------------|
| DG4 | Malignancies of upper respiratory tract | 1875 | Malignant neoplasm of epididymis                                      |
| DG4 | Malignancies of upper respiratory tract | 1876 | Malignant neoplasm of spermatic cord                                  |
| DG4 | Malignancies of upper respiratory tract | 1877 | Malignant neoplasm of scrotum                                         |
| DG4 | Malignancies of upper respiratory tract | 1878 | Malignant neoplasm of other specified sites of male genital organs    |
| DG4 | Malignancies of upper respiratory tract | 1879 | Malignant neoplasm of male genital organ, site unspecified            |
| DG4 | Malignancies of upper respiratory tract | 188  | Malignant neoplasm of bladder                                         |
| DG4 | Malignancies of upper respiratory tract | 1880 | Malignant neoplasm of trigone of urinary bladder                      |
| DG4 | Malignancies of upper respiratory tract | 1881 | Malignant neoplasm of dome of urinary bladder                         |
| DG4 | Malignancies of upper respiratory tract | 1882 | Malignant neoplasm of lateral wall of urinary bladder                 |
| DG4 | Malignancies of upper respiratory tract | 1883 | Malignant neoplasm of anterior wall of urinary bladder                |
| DG4 | Malignancies of upper respiratory tract | 1884 | Malignant neoplasm of posterior wall of urinary bladder               |
| DG4 | Malignancies of upper respiratory tract | 1885 | Malignant neoplasm of bladder neck                                    |
| DG4 | Malignancies of upper respiratory tract | 1886 | Malignant neoplasm of ureteric orifice                                |
| DG4 | Malignancies of upper respiratory tract | 1887 | Malignant neoplasm of urachus                                         |
| DG4 | Malignancies of upper respiratory tract | 1888 | Malignant neoplasm of other specified sites of bladder                |
| DG4 | Malignancies of upper respiratory tract | 1889 | Malignant neoplasm of bladder, part unspecified                       |
| DG4 | Malignancies of upper respiratory tract | 189  | Malignant neoplasm of kidney and other and unspecified urinary organs |
| DG4 | Malignancies of upper respiratory tract | 1890 | Malignant neoplasm of kidney, except pelvis                           |
| DG4 | Malignancies of upper respiratory tract | 1891 | Malignant neoplasm of renal pelvis                                    |
| DG4 | Malignancies of upper respiratory tract | 1892 | Malignant neoplasm of ureter                                          |
| DG4 | Malignancies of upper respiratory tract | 1893 | Malignant neoplasm of urethra                                         |
| DG4 | Malignancies of upper respiratory tract | 1894 | Malignant neoplasm of paraurethral glands                             |
| DG4 | Malignancies of upper respiratory tract | 1898 | Malignant neoplasm of other specified sites of urinary organs         |
| DG4 | Malignancies of upper respiratory tract | 1899 | Malignant neoplasm of urinary organ, site unspecified                 |
| DG4 | Malignancies of upper respiratory tract | 194  | Malignant neoplasm of other endocrine glands and related structures   |

|     |                                         |      |                                                                     |
|-----|-----------------------------------------|------|---------------------------------------------------------------------|
| DG4 | Malignancies of upper respiratory tract | 1940 | Malignant neoplasm of adrenal gland                                 |
| DG4 | Malignancies of upper respiratory tract | 1941 | Malignant neoplasm of parathyroid gland                             |
| DG4 | Malignancies of upper respiratory tract | 1943 | Malignant neoplasm of pituitary gland and craniopharyngeal duct     |
| DG4 | Malignancies of upper respiratory tract | 1944 | Malignant neoplasm of pineal gland                                  |
| DG4 | Malignancies of upper respiratory tract | 1945 | Malignant neoplasm of carotid body                                  |
| DG4 | Malignancies of upper respiratory tract | 1946 | Malignant neoplasm of aortic body and other paraganglia             |
| DG4 | Malignancies of upper respiratory tract | 1948 | Malignant neoplasm of other endocrine glands and related structures |
| DG4 | Malignancies of upper respiratory tract | 1949 | Malignant neoplasm of endocrine gland, site unspecified             |
| DG4 | Malignancies of upper respiratory tract | 195  | Malignant neoplasm of other and ill-defined sites                   |
| DG4 | Malignancies of upper respiratory tract | 1950 | Malignant neoplasm of head, face, and neck                          |
| DG4 | Malignancies of upper respiratory tract | 1951 | Malignant neoplasm of thorax                                        |
| DG4 | Malignancies of upper respiratory tract | 1952 | Malignant neoplasm of abdomen                                       |
| DG4 | Malignancies of upper respiratory tract | 1953 | Malignant neoplasm of pelvis                                        |
| DG4 | Malignancies of upper respiratory tract | 1954 | Malignant neoplasm of upper limb                                    |
| DG4 | Malignancies of upper respiratory tract | 1955 | Malignant neoplasm of lower limb                                    |
| DG4 | Malignancies of upper respiratory tract | 1958 | Malignant neoplasm of other specified sites                         |
| DG4 | Malignancies of upper respiratory tract | 198  | Secondary malignant neoplasm of other specified sites               |
| DG4 | Malignancies of upper respiratory tract | 1980 | Secondary malignant neoplasm of kidney                              |
| DG4 | Malignancies of upper respiratory tract | 1981 | Secondary malignant neoplasm of other urinary organs                |
| DG4 | Malignancies of upper respiratory tract | 1982 | Secondary malignant neoplasm of skin                                |
| DG4 | Malignancies of upper respiratory tract | 1983 | Secondary malignant neoplasm of brain and spinal cord               |
| DG4 | Malignancies of upper respiratory tract | 1984 | Secondary malignant neoplasm of other parts of nervous system       |
| DG4 | Malignancies of upper respiratory tract | 1985 | Secondary malignant neoplasm of bone and bone marrow                |
| DG4 | Malignancies of upper respiratory tract | 1986 | Secondary malignant neoplasm of ovary                               |
| DG4 | Malignancies of upper respiratory tract | 1987 | Secondary malignant neoplasm of adrenal gland                       |

|     |                                         |       |                                                                            |
|-----|-----------------------------------------|-------|----------------------------------------------------------------------------|
| DG4 | Malignancies of upper respiratory tract | 1988  | Other specified sites                                                      |
| DG4 | Malignancies of upper respiratory tract | 19881 | Secondary malignant neoplasm of breast                                     |
| DG4 | Malignancies of upper respiratory tract | 19882 | Secondary malignant neoplasm of genital organs                             |
| DG4 | Malignancies of upper respiratory tract | 19889 | Secondary malignant neoplasm of other specified sites                      |
| DG4 | Malignancies of upper respiratory tract | 199   | Malignant neoplasm without specification of site                           |
| DG4 | Malignancies of upper respiratory tract | 1990  | Disseminated malignant neoplasm without specification of site              |
| DG4 | Malignancies of upper respiratory tract | 1991  | Other malignant neoplasm without specification of site                     |
| DG4 | Malignancies of upper respiratory tract | 1992  | Malignant neoplasm associated with transplant organ                        |
| DG4 | Malignancies of upper respiratory tract | 201   | Hodgkin's disease                                                          |
| DG4 | Malignancies of upper respiratory tract | 2010  | Hodgkin's paraganuloma                                                     |
| DG4 | Malignancies of upper respiratory tract | 20100 | Hodgkin's paraganuloma, unspecified site, extranodal and solid organ sites |
| DG4 | Malignancies of upper respiratory tract | 20101 | Hodgkin's paraganuloma, lymph nodes of head, face, and neck                |
| DG4 | Malignancies of upper respiratory tract | 20102 | Hodgkin's paraganuloma, intrathoracic lymph nodes                          |
| DG4 | Malignancies of upper respiratory tract | 20103 | Hodgkin's paraganuloma, intra-abdominal lymph nodes                        |
| DG4 | Malignancies of upper respiratory tract | 20104 | Hodgkin's paraganuloma, lymph nodes of axilla and upper limb               |
| DG4 | Malignancies of upper respiratory tract | 20105 | Hodgkin's paraganuloma, lymph nodes of inguinal region and lower limb      |
| DG4 | Malignancies of upper respiratory tract | 20106 | Hodgkin's paraganuloma, intrapelvic lymph nodes                            |
| DG4 | Malignancies of upper respiratory tract | 20107 | Hodgkin's paraganuloma, spleen                                             |
| DG4 | Malignancies of upper respiratory tract | 20108 | Hodgkin's paraganuloma, lymph nodes of multiple sites                      |
| DG4 | Malignancies of upper respiratory tract | 2011  | Hodgkin's granuloma                                                        |
| DG4 | Malignancies of upper respiratory tract | 20110 | Hodgkin's granuloma, unspecified site, extranodal and solid organ sites    |
| DG4 | Malignancies of upper respiratory tract | 20111 | Hodgkin's granuloma, lymph nodes of head, face, and neck                   |
| DG4 | Malignancies of upper respiratory tract | 20112 | Hodgkin's granuloma, intrathoracic lymph nodes                             |
| DG4 | Malignancies of upper respiratory tract | 20113 | Hodgkin's granuloma, intra-abdominal lymph nodes                           |
| DG4 | Malignancies of upper respiratory tract | 20114 | Hodgkin's granuloma, lymph nodes of axilla and upper limb                  |

|     |                                         |       |                                                                                                             |
|-----|-----------------------------------------|-------|-------------------------------------------------------------------------------------------------------------|
| DG4 | Malignancies of upper respiratory tract | 20115 | Hodgkin's granuloma, lymph nodes of inguinal region and lower limb                                          |
| DG4 | Malignancies of upper respiratory tract | 20116 | Hodgkin's granuloma, intrapelvic lymph nodes                                                                |
| DG4 | Malignancies of upper respiratory tract | 20117 | Hodgkin's granuloma, spleen                                                                                 |
| DG4 | Malignancies of upper respiratory tract | 20118 | Hodgkin's granuloma, lymph nodes of multiple sites                                                          |
| DG4 | Malignancies of upper respiratory tract | 2012  | Hodgkin's sarcoma                                                                                           |
| DG4 | Malignancies of upper respiratory tract | 20120 | Hodgkin's sarcoma, unspecified site, extranodal and solid organ sites                                       |
| DG4 | Malignancies of upper respiratory tract | 20121 | Hodgkin's sarcoma, lymph nodes of head, face, and neck                                                      |
| DG4 | Malignancies of upper respiratory tract | 20122 | Hodgkin's sarcoma, intrathoracic lymph nodes                                                                |
| DG4 | Malignancies of upper respiratory tract | 20123 | Hodgkin's sarcoma, intra-abdominal lymph nodes                                                              |
| DG4 | Malignancies of upper respiratory tract | 20124 | Hodgkin's sarcoma, lymph nodes of axilla and upper limb                                                     |
| DG4 | Malignancies of upper respiratory tract | 20125 | Hodgkin's sarcoma, lymph nodes of inguinal region and lower limb                                            |
| DG4 | Malignancies of upper respiratory tract | 20126 | Hodgkin's sarcoma, intrapelvic lymph nodes                                                                  |
| DG4 | Malignancies of upper respiratory tract | 20127 | Hodgkin's sarcoma, spleen                                                                                   |
| DG4 | Malignancies of upper respiratory tract | 20128 | Hodgkin's sarcoma, lymph nodes of multiple sites                                                            |
| DG4 | Malignancies of upper respiratory tract | 2014  | Lymphocytic-histiocytic predominance                                                                        |
| DG4 | Malignancies of upper respiratory tract | 20140 | Hodgkin's disease, lymphocytic-histiocytic predominance, unspecified site, extranodal and solid organ sites |
| DG4 | Malignancies of upper respiratory tract | 20141 | Hodgkin's disease, lymphocytic-histiocytic predominance, lymph nodes of head, face, and neck                |
| DG4 | Malignancies of upper respiratory tract | 20142 | Hodgkin's disease, lymphocytic-histiocytic predominance, intrathoracic lymph nodes                          |
| DG4 | Malignancies of upper respiratory tract | 20143 | Hodgkin's disease, lymphocytic-histiocytic predominance, intra-abdominal lymph nodes                        |
| DG4 | Malignancies of upper respiratory tract | 20144 | Hodgkin's disease, lymphocytic-histiocytic predominance, lymph nodes of axilla and upper limb               |
| DG4 | Malignancies of upper respiratory tract | 20145 | Hodgkin's disease, lymphocytic-histiocytic predominance, lymph nodes of inguinal region and lower limb      |
| DG4 | Malignancies of upper respiratory tract | 20146 | Hodgkin's disease, lymphocytic-histiocytic predominance, intrapelvic lymph nodes                            |
| DG4 | Malignancies of upper respiratory tract | 20147 | Hodgkin's disease, lymphocytic-histiocytic predominance, spleen                                             |
| DG4 | Malignancies of upper respiratory tract | 20148 | Hodgkin's disease, lymphocytic-histiocytic predominance, lymph nodes of multiple sites                      |
| DG4 | Malignancies of upper respiratory tract | 2015  | Nodular sclerosis                                                                                           |



|     |                                         |       |                                                                                              |
|-----|-----------------------------------------|-------|----------------------------------------------------------------------------------------------|
| DG4 | Malignancies of upper respiratory tract | 20150 | Hodgkin's disease, nodular sclerosis, unspecified site, extranodal and solid organ sites     |
| DG4 | Malignancies of upper respiratory tract | 20151 | Hodgkin's disease, nodular sclerosis, lymph nodes of head, face, and neck                    |
| DG4 | Malignancies of upper respiratory tract | 20152 | Hodgkin's disease, nodular sclerosis, intrathoracic lymph nodes                              |
| DG4 | Malignancies of upper respiratory tract | 20153 | Hodgkin's disease, nodular sclerosis, intra-abdominal lymph nodes                            |
| DG4 | Malignancies of upper respiratory tract | 20154 | Hodgkin's disease, nodular sclerosis, lymph nodes of axilla and upper limb                   |
| DG4 | Malignancies of upper respiratory tract | 20155 | Hodgkin's disease, nodular sclerosis, lymph nodes of inguinal region and lower limb          |
| DG4 | Malignancies of upper respiratory tract | 20156 | Hodgkin's disease, nodular sclerosis, intrapelvic lymph nodes                                |
| DG4 | Malignancies of upper respiratory tract | 20157 | Hodgkin's disease, nodular sclerosis, spleen                                                 |
| DG4 | Malignancies of upper respiratory tract | 20158 | Hodgkin's disease, nodular sclerosis, lymph nodes of multiple sites                          |
| DG4 | Malignancies of upper respiratory tract | 2016  | Mixed cellularity                                                                            |
| DG4 | Malignancies of upper respiratory tract | 20160 | Hodgkin's disease, mixed cellularity, unspecified site, extranodal and solid organ sites     |
| DG4 | Malignancies of upper respiratory tract | 20161 | Hodgkin's disease, mixed cellularity, lymph nodes of head, face, and neck                    |
| DG4 | Malignancies of upper respiratory tract | 20162 | Hodgkin's disease, mixed cellularity, intrathoracic lymph nodes                              |
| DG4 | Malignancies of upper respiratory tract | 20163 | Hodgkin's disease, mixed cellularity, intra-abdominal lymph nodes                            |
| DG4 | Malignancies of upper respiratory tract | 20164 | Hodgkin's disease, mixed cellularity, lymph nodes of axilla and upper limb                   |
| DG4 | Malignancies of upper respiratory tract | 20165 | Hodgkin's disease, mixed cellularity, lymph nodes of inguinal region and lower limb          |
| DG4 | Malignancies of upper respiratory tract | 20166 | Hodgkin's disease, mixed cellularity, intrapelvic lymph nodes                                |
| DG4 | Malignancies of upper respiratory tract | 20167 | Hodgkin's disease, mixed cellularity, spleen                                                 |
| DG4 | Malignancies of upper respiratory tract | 20168 | Hodgkin's disease, mixed cellularity, lymph nodes of multiple sites                          |
| DG4 | Malignancies of upper respiratory tract | 2017  | Lymphocytic depletion                                                                        |
| DG4 | Malignancies of upper respiratory tract | 20170 | Hodgkin's disease, lymphocytic depletion, unspecified site, extranodal and solid organ sites |
| DG4 | Malignancies of upper respiratory tract | 20171 | Hodgkin's disease, lymphocytic depletion, lymph nodes of head, face, and neck                |
| DG4 | Malignancies of upper respiratory tract | 20172 | Hodgkin's disease, lymphocytic depletion, intrathoracic lymph nodes                          |
| DG4 | Malignancies of upper respiratory tract | 20173 | Hodgkin's disease, lymphocytic depletion, intra-abdominal lymph nodes                        |
| DG4 | Malignancies of upper respiratory tract | 20174 | Hodgkin's disease, lymphocytic depletion, lymph nodes of axilla and upper limb               |

|     |                                         |       |                                                                                         |
|-----|-----------------------------------------|-------|-----------------------------------------------------------------------------------------|
| DG4 | Malignancies of upper respiratory tract | 20175 | Hodgkin's disease, lymphocytic depletion, lymph nodes of inguinal region and lower limb |
| DG4 | Malignancies of upper respiratory tract | 20176 | Hodgkin's disease, lymphocytic depletion, intrapelvic lymph nodes                       |
| DG4 | Malignancies of upper respiratory tract | 20177 | Hodgkin's disease, lymphocytic depletion, spleen                                        |
| DG4 | Malignancies of upper respiratory tract | 20178 | Hodgkin's disease, lymphocytic depletion, lymph nodes of multiple sites                 |
| DG4 | Malignancies of upper respiratory tract | 2019  | Hodgkin's disease, unspecified                                                          |
| DG4 | Malignancies of upper respiratory tract | 20190 | Hodgkin's disease, unspecified type, unspecified site, extranodal and solid organ sites |
| DG4 | Malignancies of upper respiratory tract | 20191 | Hodgkin's disease, unspecified type, lymph nodes of head, face, and neck                |
| DG4 | Malignancies of upper respiratory tract | 20192 | Hodgkin's disease, unspecified type, intrathoracic lymph nodes                          |
| DG4 | Malignancies of upper respiratory tract | 20193 | Hodgkin's disease, unspecified type, intra-abdominal lymph nodes                        |
| DG4 | Malignancies of upper respiratory tract | 20194 | Hodgkin's disease, unspecified type, lymph nodes of axilla and upper limb               |
| DG4 | Malignancies of upper respiratory tract | 20195 | Hodgkin's disease, unspecified type, lymph nodes of inguinal region and lower limb      |
| DG4 | Malignancies of upper respiratory tract | 20196 | Hodgkin's disease, unspecified type, intrapelvic lymph nodes                            |
| DG4 | Malignancies of upper respiratory tract | 20197 | Hodgkin's disease, unspecified type, spleen                                             |
| DG4 | Malignancies of upper respiratory tract | 20198 | Hodgkin's disease, unspecified type, lymph nodes of multiple sites                      |
| DG4 | Malignancies of upper respiratory tract | 206   | Monocytic leukemia                                                                      |
| DG4 | Malignancies of upper respiratory tract | 2060  | Acute                                                                                   |
| DG4 | Malignancies of upper respiratory tract | 20600 | Acute monocytic leukemia, without mention of having achieved remission                  |
| DG4 | Malignancies of upper respiratory tract | 20601 | Acute monocytic leukemia, in remission                                                  |
| DG4 | Malignancies of upper respiratory tract | 20602 | Acute monocytic leukemia, in relapse                                                    |
| DG4 | Malignancies of upper respiratory tract | 2061  | Chronic                                                                                 |
| DG4 | Malignancies of upper respiratory tract | 20610 | Chronic monocytic leukemia, without mention of having achieved remission                |
| DG4 | Malignancies of upper respiratory tract | 20611 | Chronic monocytic leukemia, in remission                                                |
| DG4 | Malignancies of upper respiratory tract | 20612 | Chronic monocytic leukemia, in relapse                                                  |
| DG4 | Malignancies of upper respiratory tract | 2062  | Subacute                                                                                |
| DG4 | Malignancies of upper respiratory tract | 20620 | Subacute monocytic leukemia, without mention of having achieved remission               |

|     |                                         |       |                                                                                    |
|-----|-----------------------------------------|-------|------------------------------------------------------------------------------------|
| DG4 | Malignancies of upper respiratory tract | 20621 | Subacute monocytic leukemia, in remission                                          |
| DG4 | Malignancies of upper respiratory tract | 20622 | Subacute monocytic leukemia, in relapse                                            |
| DG4 | Malignancies of upper respiratory tract | 2068  | Other monocytic leukemia                                                           |
| DG4 | Malignancies of upper respiratory tract | 20680 | Other monocytic leukemia, without mention of having achieved remission             |
| DG4 | Malignancies of upper respiratory tract | 20681 | Other monocytic leukemia, in remission                                             |
| DG4 | Malignancies of upper respiratory tract | 20682 | Other monocytic leukemia, in relapse                                               |
| DG4 | Malignancies of upper respiratory tract | 2069  | Unspecified monocytic leukemia                                                     |
| DG4 | Malignancies of upper respiratory tract | 20690 | Unspecified monocytic leukemia, without mention of having achieved remission       |
| DG4 | Malignancies of upper respiratory tract | 20691 | Unspecified monocytic leukemia, in remission                                       |
| DG4 | Malignancies of upper respiratory tract | 20692 | Unspecified monocytic leukemia, in relapse                                         |
| DG4 | Malignancies of upper respiratory tract | 207   | Other specified leukemia                                                           |
| DG4 | Malignancies of upper respiratory tract | 2070  | Acute erythremia and erythroleukemia                                               |
| DG4 | Malignancies of upper respiratory tract | 20700 | Acute erythremia and erythroleukemia, without mention of having achieved remission |
| DG4 | Malignancies of upper respiratory tract | 20701 | Acute erythremia and erythroleukemia, in remission                                 |
| DG4 | Malignancies of upper respiratory tract | 20702 | Acute erythremia and erythroleukemia, in relapse                                   |
| DG4 | Malignancies of upper respiratory tract | 2071  | Chronic erythremia                                                                 |
| DG4 | Malignancies of upper respiratory tract | 20710 | Chronic erythremia, without mention of having achieved remission                   |
| DG4 | Malignancies of upper respiratory tract | 20711 | Chronic erythremia, in remission                                                   |
| DG4 | Malignancies of upper respiratory tract | 20712 | Chronic erythremia, in relapse                                                     |
| DG4 | Malignancies of upper respiratory tract | 2072  | Megakaryocytic leukemia                                                            |
| DG4 | Malignancies of upper respiratory tract | 20720 | Megakaryocytic leukemia, without mention of having achieved remission              |
| DG4 | Malignancies of upper respiratory tract | 20721 | Megakaryocytic leukemia, in remission                                              |
| DG4 | Malignancies of upper respiratory tract | 20722 | Megakaryocytic leukemia, in relapse                                                |
| DG4 | Malignancies of upper respiratory tract | 2078  | Other specified leukemia                                                           |
| DG4 | Malignancies of upper respiratory tract | 20780 | Other specified leukemia, without mention of having achieved remission             |

|     |                                         |       |                                                                                          |
|-----|-----------------------------------------|-------|------------------------------------------------------------------------------------------|
| DG4 | Malignancies of upper respiratory tract | 20781 | Other specified leukemia, in remission                                                   |
| DG4 | Malignancies of upper respiratory tract | 20782 | Other specified leukemia, in relapse                                                     |
| DG4 | Malignancies of upper respiratory tract | 208   | Leukemia of unspecified cell type                                                        |
| DG4 | Malignancies of upper respiratory tract | 2080  | Acute                                                                                    |
| DG4 | Malignancies of upper respiratory tract | 20800 | Acute leukemia of unspecified cell type, without mention of having achieved remission    |
| DG4 | Malignancies of upper respiratory tract | 20801 | Acute leukemia of unspecified cell type, in remission                                    |
| DG4 | Malignancies of upper respiratory tract | 20802 | Acute leukemia of unspecified cell type, in relapse                                      |
| DG4 | Malignancies of upper respiratory tract | 2081  | Chronic                                                                                  |
| DG4 | Malignancies of upper respiratory tract | 20810 | Chronic leukemia of unspecified cell type, without mention of having achieved remission  |
| DG4 | Malignancies of upper respiratory tract | 20811 | Chronic leukemia of unspecified cell type, in remission                                  |
| DG4 | Malignancies of upper respiratory tract | 20812 | Chronic leukemia of unspecified cell type, in relapse                                    |
| DG4 | Malignancies of upper respiratory tract | 2082  | Subacute                                                                                 |
| DG4 | Malignancies of upper respiratory tract | 20820 | Subacute leukemia of unspecified cell type, without mention of having achieved remission |
| DG4 | Malignancies of upper respiratory tract | 20821 | Subacute leukemia of unspecified cell type, in remission                                 |
| DG4 | Malignancies of upper respiratory tract | 20822 | Subacute leukemia of unspecified cell type, in relapse                                   |
| DG4 | Malignancies of upper respiratory tract | 2088  | Other leukemia of unspecified cell type                                                  |
| DG4 | Malignancies of upper respiratory tract | 20880 | Other leukemia of unspecified cell type, without mention of having achieved remission    |
| DG4 | Malignancies of upper respiratory tract | 20881 | Other leukemia of unspecified cell type, in remission                                    |
| DG4 | Malignancies of upper respiratory tract | 20882 | Other leukemia of unspecified cell type, in relapse                                      |
| DG4 | Malignancies of upper respiratory tract | 2089  | Unspecified leukemia                                                                     |
| DG4 | Malignancies of upper respiratory tract | 20890 | Unspecified leukemia, without mention of having achieved remission                       |
| DG4 | Malignancies of upper respiratory tract | 20891 | Unspecified leukemia, in remission                                                       |
| DG4 | Malignancies of upper respiratory tract | 20892 | Unspecified leukemia, in relapse                                                         |
| DG4 | Malignancies of upper respiratory tract | 234   | Carcinoma in situ of other and unspecified sites                                         |
| DG4 | Malignancies of upper respiratory tract | 2340  | Carcinoma in situ of eye                                                                 |

|     |                                         |       |                                                                                                          |
|-----|-----------------------------------------|-------|----------------------------------------------------------------------------------------------------------|
| DG4 | Malignancies of upper respiratory tract | 2348  | Carcinoma in situ of other specified sites                                                               |
| DG4 | Malignancies of upper respiratory tract | 2349  | Carcinoma in situ, site unspecified                                                                      |
| DG4 | Malignancies of upper respiratory tract | 23877 | Post-transplant lymphoproliferative disorder (PTLD)                                                      |
| DG4 | Malignancies of upper respiratory tract | 2396  | Neoplasm of unspecified nature of brain                                                                  |
| DG5 | Malignancies of lower respiratory tract | 162   | Malignant neoplasm of trachea, bronchus, and lung                                                        |
| DG5 | Malignancies of lower respiratory tract | 1620  | Malignant neoplasm of trachea                                                                            |
| DG5 | Malignancies of lower respiratory tract | 1622  | Malignant neoplasm of main bronchus                                                                      |
| DG5 | Malignancies of lower respiratory tract | 1623  | Malignant neoplasm of upper lobe, bronchus or lung                                                       |
| DG5 | Malignancies of lower respiratory tract | 1624  | Malignant neoplasm of middle lobe, bronchus or lung                                                      |
| DG5 | Malignancies of lower respiratory tract | 1625  | Malignant neoplasm of lower lobe, bronchus or lung                                                       |
| DG5 | Malignancies of lower respiratory tract | 1628  | Malignant neoplasm of other parts of bronchus or lung                                                    |
| DG5 | Malignancies of lower respiratory tract | 1629  | Malignant neoplasm of bronchus and lung, unspecified                                                     |
| DG5 | Malignancies of lower respiratory tract | 163   | Malignant neoplasm of pleura                                                                             |
| DG5 | Malignancies of lower respiratory tract | 1630  | Malignant neoplasm of parietal pleura                                                                    |
| DG5 | Malignancies of lower respiratory tract | 1631  | Malignant neoplasm of visceral pleura                                                                    |
| DG5 | Malignancies of lower respiratory tract | 1638  | Malignant neoplasm of other specified sites of pleura                                                    |
| DG5 | Malignancies of lower respiratory tract | 1639  | Malignant neoplasm of pleura, unspecified                                                                |
| DG5 | Malignancies of lower respiratory tract | 165   | Malignant neoplasm of other and ill-defined sites within the respiratory system and intrathoracic organs |
| DG5 | Malignancies of lower respiratory tract | 1650  | Malignant neoplasm of upper respiratory tract, part unspecified                                          |
| DG5 | Malignancies of lower respiratory tract | 1658  | Malignant neoplasm of other sites within the respiratory system and intrathoracic organs                 |
| DG5 | Malignancies of lower respiratory tract | 1659  | Malignant neoplasm of ill-defined sites within the respiratory system                                    |
| DG5 | Malignancies of lower respiratory tract | 197   | Secondary malignant neoplasm of respiratory and digestive systems                                        |
| DG5 | Malignancies of lower respiratory tract | 1970  | Secondary malignant neoplasm of lung                                                                     |
| DG5 | Malignancies of lower respiratory tract | 1971  | Secondary malignant neoplasm of mediastinum                                                              |
| DG5 | Malignancies of lower respiratory tract | 1972  | Secondary malignant neoplasm of pleura                                                                   |

|     |                                         |       |                                                                    |
|-----|-----------------------------------------|-------|--------------------------------------------------------------------|
| DG5 | Malignancies of lower respiratory tract | 1973  | Secondary malignant neoplasm of other respiratory organs           |
| DG5 | Malignancies of lower respiratory tract | 1974  | Secondary malignant neoplasm of small intestine including duodenum |
| DG5 | Malignancies of lower respiratory tract | 1975  | Secondary malignant neoplasm of large intestine and rectum         |
| DG5 | Malignancies of lower respiratory tract | 1976  | Secondary malignant neoplasm of retroperitoneum and peritoneum     |
| DG5 | Malignancies of lower respiratory tract | 1977  | Malignant neoplasm of liver, secondary                             |
| DG5 | Malignancies of lower respiratory tract | 1978  | Secondary malignant neoplasm of other digestive organs and spleen  |
| DG5 | Malignancies of lower respiratory tract | 231   | Carcinoma in situ of respiratory system                            |
| DG5 | Malignancies of lower respiratory tract | 2310  | Carcinoma in situ of larynx                                        |
| DG5 | Malignancies of lower respiratory tract | 2311  | Carcinoma in situ of trachea                                       |
| DG5 | Malignancies of lower respiratory tract | 2312  | Carcinoma in situ of bronchus and lung                             |
| DG5 | Malignancies of lower respiratory tract | 2318  | Carcinoma in situ of other specified parts of respiratory system   |
| DG5 | Malignancies of lower respiratory tract | 2319  | Carcinoma in situ of respiratory system, part unspecified          |
| DG6 | Central nervous diseases                | 38002 | Chronic perichondritis of pinna                                    |
| DG6 | Central nervous diseases                | 38014 | Malignant otitis externa                                           |
| DG6 | Central nervous diseases                | 38015 | Chronic mycotic otitis externa                                     |
| DG6 | Central nervous diseases                | 38016 | Other chronic infective otitis externa                             |
| DG6 | Central nervous diseases                | 38023 | Other chronic otitis externa                                       |
| DG6 | Central nervous diseases                | 3811  | Chronic serous otitis media                                        |
| DG6 | Central nervous diseases                | 38110 | Chronic serous otitis media, simple or unspecified                 |
| DG6 | Central nervous diseases                | 38119 | Other chronic serous otitis media                                  |
| DG6 | Central nervous diseases                | 3812  | Chronic mucoid otitis media                                        |
| DG6 | Central nervous diseases                | 38120 | Chronic mucoid otitis media, simple or unspecified                 |
| DG6 | Central nervous diseases                | 38129 | Other chronic mucoid otitis media                                  |
| DG6 | Central nervous diseases                | 3813  | Other and unspecified chronic nonsuppurative otitis media          |
| DG6 | Central nervous diseases                | 38152 | Chronic Eustachian salpingitis                                     |

|     |                          |       |                                                             |
|-----|--------------------------|-------|-------------------------------------------------------------|
| DG6 | Central nervous diseases | 3821  | Chronic tubotympanic suppurative otitis media               |
| DG6 | Central nervous diseases | 3822  | Chronic atticoantral suppurative otitis media               |
| DG6 | Central nervous diseases | 3823  | Unspecified chronic suppurative otitis media                |
| DG6 | Central nervous diseases | 472   | Chronic pharyngitis and nasopharyngitis                     |
| DG6 | Central nervous diseases | 4720  | Chronic rhinitis                                            |
| DG6 | Central nervous diseases | 4721  | Chronic pharyngitis                                         |
| DG6 | Central nervous diseases | 4722  | Chronic nasopharyngitis                                     |
| DG6 | Central nervous diseases | 473   | Chronic sinusitis                                           |
| DG6 | Central nervous diseases | 4730  | Chronic maxillary sinusitis                                 |
| DG6 | Central nervous diseases | 4731  | Chronic frontal sinusitis                                   |
| DG6 | Central nervous diseases | 4732  | Chronic ethmoidal sinusitis                                 |
| DG6 | Central nervous diseases | 4733  | Chronic sphenoidal sinusitis                                |
| DG6 | Central nervous diseases | 4738  | Other chronic sinusitis                                     |
| DG6 | Central nervous diseases | 4739  | Unspecified sinusitis (chronic)                             |
| DG6 | Central nervous diseases | 476   | Chronic laryngitis and laryngotracheitis                    |
| DG6 | Central nervous diseases | 4760  | Chronic laryngitis                                          |
| DG6 | Central nervous diseases | 4761  | Chronic laryngotracheitis                                   |
| DG6 | Central nervous diseases | 477   | Allergic rhinitis                                           |
| DG6 | Central nervous diseases | 4770  | Allergic rhinitis due to pollen                             |
| DG6 | Central nervous diseases | 4771  | Allergic rhinitis due to food                               |
| DG6 | Central nervous diseases | 4772  | Allergic rhinitis due to animal (cat) (dog) hair and dander |
| DG6 | Central nervous diseases | 4778  | Allergic rhinitis due to other allergen                     |
| DG6 | Central nervous diseases | 4779  | Allergic rhinitis, cause unspecified                        |
| DG6 | Central nervous diseases | 47811 | Nasal mucositis (ulcerative)                                |
| DG6 | Central nervous diseases | 4783  | Paralysis of vocal cords or larynx                          |

|     |                           |       |                                                          |
|-----|---------------------------|-------|----------------------------------------------------------|
| DG6 | Central nervous diseases  | 47830 | Paralysis of vocal cords or larynx, unspecified          |
| DG6 | Central nervous diseases  | 47831 | Unilateral paralysis of vocal cords or larynx, partial   |
| DG6 | Central nervous diseases  | 47832 | Unilateral paralysis of vocal cords or larynx, complete  |
| DG6 | Central nervous diseases  | 47833 | Bilateral paralysis of vocal cords or larynx, partial    |
| DG6 | Central nervous diseases  | 47834 | Bilateral paralysis of vocal cords or larynx, complete   |
| DG7 | Hematological alterations | 2800  | Iron deficiency anemia secondary to blood loss (chronic) |
| DG7 | Hematological alterations | 284   | Aplastic anemia and other bone marrow failure syndromes  |
| DG7 | Hematological alterations | 2840  | Constitutional aplastic anemia                           |
| DG7 | Hematological alterations | 28401 | Constitutional red blood cell aplasia                    |
| DG7 | Hematological alterations | 28409 | Other constitutional aplastic anemia                     |
| DG7 | Hematological alterations | 2841  | Pancytopenia                                             |
| DG7 | Hematological alterations | 28411 | Antineoplastic chemotherapy induced pancytopenia         |
| DG7 | Hematological alterations | 28412 | Other drug-induced pancytopenia                          |
| DG7 | Hematological alterations | 28419 | Other pancytopenia                                       |
| DG7 | Hematological alterations | 2842  | Myelophthisis                                            |
| DG7 | Hematological alterations | 2848  | Other specified aplastic anemias                         |
| DG7 | Hematological alterations | 28481 | Red cell aplasia (acquired)(adult)(with thymoma)         |
| DG7 | Hematological alterations | 28489 | Other specified aplastic anemias                         |
| DG7 | Hematological alterations | 2849  | Aplastic anemia, unspecified                             |
| DG7 | Hematological alterations | 286   | Coagulation defects                                      |
| DG7 | Hematological alterations | 2860  | Congenital factor VIII disorder                          |
| DG7 | Hematological alterations | 2861  | Congenital factor IX disorder                            |
| DG7 | Hematological alterations | 2862  | Congenital factor XI deficiency                          |
| DG7 | Hematological alterations | 2863  | Congenital deficiency of other clotting factors          |
| DG7 | Hematological alterations | 2864  | Von Willebrand's disease                                 |



|     |                           |       |                                                                                                   |
|-----|---------------------------|-------|---------------------------------------------------------------------------------------------------|
| DG7 | Hematological alterations | 2865  | Hemorrhagic disorder due to intrinsic circulating anticoagulants, antibodies, or inhibitors       |
| DG7 | Hematological alterations | 28652 | Acquired hemophilia                                                                               |
| DG7 | Hematological alterations | 28653 | Antiphospholipid antibody with hemorrhagic disorder                                               |
| DG7 | Hematological alterations | 28659 | Other hemorrhagic disorder due to intrinsic circulating anticoagulants, antibodies, or inhibitors |
| DG7 | Hematological alterations | 2866  | Defibrination syndrome                                                                            |
| DG7 | Hematological alterations | 2867  | Acquired coagulation factor deficiency                                                            |
| DG7 | Hematological alterations | 2869  | Other and unspecified coagulation defects                                                         |
| DG7 | Hematological alterations | 2871  | Qualitative platelet defects                                                                      |
| DG7 | Hematological alterations | 2873  | Primary thrombocytopenia                                                                          |
| DG7 | Hematological alterations | 28730 | Primary thrombocytopenia,unspecified                                                              |
| DG7 | Hematological alterations | 28731 | Immune thrombocytopenic purpura                                                                   |
| DG7 | Hematological alterations | 28732 | Evans' syndrome                                                                                   |
| DG7 | Hematological alterations | 28733 | Congenital and hereditary thrombocytopenic purpura                                                |
| DG7 | Hematological alterations | 28739 | Other primary thrombocytopenia                                                                    |
| DG7 | Hematological alterations | 2874  | Secondary thrombocytopenia                                                                        |
| DG7 | Hematological alterations | 2875  | Thrombocytopenia, unspecified                                                                     |
| DG7 | Hematological alterations | 288   | Diseases of white blood cells                                                                     |
| DG7 | Hematological alterations | 2880  | Neutropenia                                                                                       |
| DG7 | Hematological alterations | 28800 | Neutropenia, unspecified                                                                          |
| DG7 | Hematological alterations | 28801 | Congenital neutropenia                                                                            |
| DG7 | Hematological alterations | 28802 | Cyclic neutropenia                                                                                |
| DG7 | Hematological alterations | 28803 | Drug induced neutropenia                                                                          |
| DG7 | Hematological alterations | 28804 | Neutropenia due to infection                                                                      |
| DG7 | Hematological alterations | 28809 | Other neutropenia                                                                                 |
| DG7 | Hematological alterations | 2881  | Functional disorders of polymorphonuclear neutrophils                                             |

|     |                           |       |                                              |
|-----|---------------------------|-------|----------------------------------------------|
| DG7 | Hematological alterations | 2882  | Genetic anomalies of leukocytes              |
| DG7 | Hematological alterations | 2883  | Eosinophilia                                 |
| DG7 | Hematological alterations | 2884  | Hemophagocytic syndromes                     |
| DG7 | Hematological alterations | 2885  | Decreased white blood cell count             |
| DG7 | Hematological alterations | 28850 | Leukocytopenia, unspecified                  |
| DG7 | Hematological alterations | 28851 | Lymphocytopenia                              |
| DG7 | Hematological alterations | 28859 | Other decreased white blood cell count       |
| DG7 | Hematological alterations | 2886  | Elevated white blood cell count              |
| DG7 | Hematological alterations | 28860 | Leukocytosis, unspecified                    |
| DG7 | Hematological alterations | 28861 | Lymphocytosis (symptomatic)                  |
| DG7 | Hematological alterations | 28862 | Leukemoid reaction                           |
| DG7 | Hematological alterations | 28863 | Monocytosis (symptomatic)                    |
| DG7 | Hematological alterations | 28864 | Plasmacytosis                                |
| DG7 | Hematological alterations | 28865 | Basophilia                                   |
| DG7 | Hematological alterations | 28866 | Bandemia                                     |
| DG7 | Hematological alterations | 28869 | Other elevated white blood cell count        |
| DG7 | Hematological alterations | 2888  | Other specified disease of white blood cells |
| DG7 | Hematological alterations | 2889  | Unspecified disease of white blood cells     |
| DG7 | Hematological alterations | 2891  | Chronic lymphadenitis                        |
| DG7 | Hematological alterations | 28951 | Chronic congestive splenomegaly              |
| DG7 | Hematological alterations | 28952 | Splenic sequestration                        |
| DG7 | Hematological alterations | 28953 | Neutropenic splenomegaly                     |
| DG7 | Hematological alterations | 28981 | Primary hypercoagulable state                |
| DG7 | Hematological alterations | 28982 | Secondary hypercoagulable state              |
| DG7 | Hematological alterations | 28983 | Myelofibrosis                                |

|     |                           |       |                                                                                                                              |
|-----|---------------------------|-------|------------------------------------------------------------------------------------------------------------------------------|
| DG7 | Hematological alterations | 28984 | Heparin-induced thrombocytopenia (HIT)                                                                                       |
| DG7 | Hematological alterations | 28989 | Other specified diseases of blood and blood-forming organs                                                                   |
| DG8 | Digestive alterations     | 251   | Other disorders of pancreatic internal secretion                                                                             |
| DG8 | Digestive alterations     | 2510  | Hypoglycemic coma                                                                                                            |
| DG8 | Digestive alterations     | 2511  | Other specified hypoglycemia                                                                                                 |
| DG8 | Digestive alterations     | 2512  | Hypoglycemia, unspecified                                                                                                    |
| DG8 | Digestive alterations     | 2513  | Postsurgical hypoinsulinemia                                                                                                 |
| DG8 | Digestive alterations     | 2514  | Abnormality of secretion of glucagon                                                                                         |
| DG8 | Digestive alterations     | 2515  | Abnormality of secretion of gastrin                                                                                          |
| DG8 | Digestive alterations     | 2518  | Other specified disorders of pancreatic internal secretion                                                                   |
| DG8 | Digestive alterations     | 2519  | Unspecified disorder of pancreatic internal secretion                                                                        |
| DG8 | Digestive alterations     | 53011 | Reflux esophagitis                                                                                                           |
| DG8 | Digestive alterations     | 53013 | Eosinophilic esophagitis                                                                                                     |
| DG8 | Digestive alterations     | 5302  | Ulcer of esophagus                                                                                                           |
| DG8 | Digestive alterations     | 53020 | Ulcer of esophagus without bleeding                                                                                          |
| DG8 | Digestive alterations     | 53021 | Ulcer of esophagus with bleeding                                                                                             |
| DG8 | Digestive alterations     | 5303  | Stricture and stenosis of esophagus                                                                                          |
| DG8 | Digestive alterations     | 5305  | Dyskinesia of esophagus                                                                                                      |
| DG8 | Digestive alterations     | 53081 | Esophageal reflux                                                                                                            |
| DG8 | Digestive alterations     | 53084 | Tracheoesophageal fistula                                                                                                    |
| DG8 | Digestive alterations     | 53085 | Barrett's esophagus                                                                                                          |
| DG8 | Digestive alterations     | 53086 | Infection of esophagostomy                                                                                                   |
| DG8 | Digestive alterations     | 53087 | Mechanical complication of esophagostomy                                                                                     |
| DG8 | Digestive alterations     | 53141 | Chronic or unspecified gastric ulcer with hemorrhage, with obstruction                                                       |
| DG8 | Digestive alterations     | 5315  | Chronic or unspecified with perforation                                                                                      |
| DG8 | Digestive alterations     | 53150 | Chronic or unspecified gastric ulcer with perforation, without mention of obstruction                                        |
| DG8 | Digestive alterations     | 53151 | Chronic or unspecified gastric ulcer with perforation, with obstruction                                                      |
| DG8 | Digestive alterations     | 5316  | Chronic or unspecified with hemorrhage and perforation                                                                       |
| DG8 | Digestive alterations     | 53160 | Chronic or unspecified gastric ulcer with hemorrhage and perforation, without mention of obstruction                         |
| DG8 | Digestive alterations     | 53161 | Chronic or unspecified gastric ulcer with hemorrhage and perforation, with obstruction                                       |
| DG8 | Digestive alterations     | 5317  | Chronic without mention of hemorrhage or perforation                                                                         |
| DG8 | Digestive alterations     | 53170 | Chronic gastric ulcer without mention of hemorrhage or perforation, without mention of obstruction                           |
| DG8 | Digestive alterations     | 53171 | Chronic gastric ulcer without mention of hemorrhage or perforation, with obstruction                                         |
| DG8 | Digestive alterations     | 5319  | Unspecified as acute or chronic, without mention of hemorrhage or perforation                                                |
| DG8 | Digestive alterations     | 53190 | Gastric ulcer, unspecified as acute or chronic, without mention of hemorrhage or perforation, without mention of obstruction |

|     |                       |       |                                                                                                                         |
|-----|-----------------------|-------|-------------------------------------------------------------------------------------------------------------------------|
| DG8 | Digestive alterations | 53191 | Gastric ulcer, unspecified as acute or chronic, without mention of hemorrhage or perforation, with obstruction          |
| DG8 | Digestive alterations | 53241 | Chronic or unspecified duodenal ulcer with hemorrhage, with obstruction                                                 |
| DG8 | Digestive alterations | 5325  | Chronic or unspecified with perforation                                                                                 |
| DG8 | Digestive alterations | 53250 | Chronic or unspecified duodenal ulcer with perforation, without mention of obstruction                                  |
| DG8 | Digestive alterations | 53251 | Chronic or unspecified duodenal ulcer with perforation, with obstruction                                                |
| DG8 | Digestive alterations | 5326  | Chronic or unspecified with hemorrhage and perforation                                                                  |
| DG8 | Digestive alterations | 53260 | Chronic or unspecified duodenal ulcer with hemorrhage and perforation, without mention of obstruction                   |
| DG8 | Digestive alterations | 53261 | Chronic or unspecified duodenal ulcer with hemorrhage and perforation, with obstruction                                 |
| DG8 | Digestive alterations | 5327  | Chronic without mention of hemorrhage or perforation                                                                    |
| DG8 | Digestive alterations | 53270 | Chronic duodenal ulcer without mention of hemorrhage or perforation, without mention of obstruction                     |
| DG8 | Digestive alterations | 53271 | Chronic duodenal ulcer without mention of hemorrhage or perforation, with obstruction                                   |
| DG8 | Digestive alterations | 5329  | Unspecified as acute or chronic, without mention of hemorrhage or perforation                                           |
| DG8 | Digestive alterations | 53290 | Duodenal ulcer, unspecified as acute or chronic, without hemorrhage or perforation, without mention of obstruction      |
| DG8 | Digestive alterations | 53291 | Duodenal ulcer, unspecified as acute or chronic, without mention of hemorrhage or perforation, with obstruction         |
| DG8 | Digestive alterations | 5334  | Chronic or unspecified with hemorrhage                                                                                  |
| DG8 | Digestive alterations | 53340 | Chronic or unspecified peptic ulcer of unspecified site with hemorrhage, without mention of obstruction                 |
| DG8 | Digestive alterations | 53341 | Chronic or unspecified peptic ulcer of unspecified site with hemorrhage, with obstruction                               |
| DG8 | Digestive alterations | 5335  | Chronic or unspecified with perforation                                                                                 |
| DG8 | Digestive alterations | 53350 | Chronic or unspecified peptic ulcer of unspecified site with perforation, without mention of obstruction                |
| DG8 | Digestive alterations | 53351 | Chronic or unspecified peptic ulcer of unspecified site with perforation, with obstruction                              |
| DG8 | Digestive alterations | 5336  | Chronic or unspecified with hemorrhage and perforation                                                                  |
| DG8 | Digestive alterations | 53360 | Chronic or unspecified peptic ulcer of unspecified site with hemorrhage and perforation, without mention of obstruction |
| DG8 | Digestive alterations | 53361 | Chronic or unspecified peptic ulcer of unspecified site with hemorrhage and perforation, with obstruction               |
| DG8 | Digestive alterations | 5337  | Chronic without mention of hemorrhage or perforation                                                                    |
| DG8 | Digestive alterations | 53370 | Chronic peptic ulcer of unspecified site without mention of hemorrhage or perforation, without mention of obstruction   |
| DG8 | Digestive alterations | 53371 | Chronic peptic ulcer of unspecified site without mention of hemorrhage or perforation, with obstruction                 |
| DG8 | Digestive alterations | 5339  | Unspecified as acute or chronic, without mention of hemorrhage or perforation                                           |

|     |                       |       |                                                                                                                                                 |
|-----|-----------------------|-------|-------------------------------------------------------------------------------------------------------------------------------------------------|
| DG8 | Digestive alterations | 53390 | Peptic ulcer of unspecified site, unspecified as acute or chronic, without mention of hemorrhage or perforation, without mention of obstruction |
| DG8 | Digestive alterations | 53391 | Peptic ulcer of unspecified site, unspecified as acute or chronic, without mention of hemorrhage or perforation, with obstruction               |
| DG8 | Digestive alterations | 5344  | Chronic or unspecified with hemorrhage                                                                                                          |
| DG8 | Digestive alterations | 53440 | Chronic or unspecified gastrojejunal ulcer with hemorrhage, without mention of obstruction                                                      |
| DG8 | Digestive alterations | 53441 | Chronic or unspecified gastrojejunal ulcer, with hemorrhage, with obstruction                                                                   |
| DG8 | Digestive alterations | 5345  | Chronic or unspecified with perforation                                                                                                         |
| DG8 | Digestive alterations | 53450 | Chronic or unspecified gastrojejunal ulcer with perforation, without mention of obstruction                                                     |
| DG8 | Digestive alterations | 53451 | Chronic or unspecified gastrojejunal ulcer with perforation, with obstruction                                                                   |
| DG8 | Digestive alterations | 5346  | Chronic or unspecified with hemorrhage and perforation                                                                                          |
| DG8 | Digestive alterations | 53460 | Chronic or unspecified gastrojejunal ulcer with hemorrhage and perforation, without mention of obstruction                                      |
| DG8 | Digestive alterations | 53461 | Chronic or unspecified gastrojejunal ulcer with hemorrhage and perforation, with obstruction                                                    |
| DG8 | Digestive alterations | 5347  | Chronic without mention of hemorrhage or perforation                                                                                            |
| DG8 | Digestive alterations | 53470 | Chronic gastrojejunal ulcer without mention of hemorrhage or perforation, without mention of obstruction                                        |
| DG8 | Digestive alterations | 53471 | Chronic gastrojejunal ulcer without mention of hemorrhage or perforation, with obstruction                                                      |
| DG8 | Digestive alterations | 5349  | Unspecified as acute or chronic, without mention of hemorrhage or perforation                                                                   |
| DG8 | Digestive alterations | 53490 | Gastrojejunal ulcer, unspecified as acute or chronic, without mention of hemorrhage or perforation, without mention of obstruction              |
| DG8 | Digestive alterations | 53491 | Gastrojejunal ulcer, unspecified as acute or chronic, without mention of hemorrhage or perforation, with obstruction                            |
| DG8 | Digestive alterations | 5351  | Atrophic gastritis                                                                                                                              |
| DG8 | Digestive alterations | 53510 | Atrophic gastritis, without mention of hemorrhage                                                                                               |
| DG8 | Digestive alterations | 53511 | Atrophic gastritis, with hemorrhage                                                                                                             |
| DG8 | Digestive alterations | 5353  | Alcoholic gastritis                                                                                                                             |
| DG8 | Digestive alterations | 53530 | Alcoholic gastritis, without mention of hemorrhage                                                                                              |
| DG8 | Digestive alterations | 53531 | Alcoholic gastritis, with hemorrhage                                                                                                            |
| DG8 | Digestive alterations | 5357  | Eosinophilic gastritis                                                                                                                          |
| DG8 | Digestive alterations | 53570 | Eosinophilic gastritis, without mention of hemorrhage                                                                                           |
| DG8 | Digestive alterations | 53571 | Eosinophilic gastritis, with hemorrhage                                                                                                         |
| DG8 | Digestive alterations | 5372  | Chronic duodenal ileus                                                                                                                          |
| DG8 | Digestive alterations | 556   | Ulcerative colitis                                                                                                                              |
| DG8 | Digestive alterations | 5560  | Ulcerative (chronic) enterocolitis                                                                                                              |
| DG8 | Digestive alterations | 5561  | Ulcerative (chronic) ileocolitis                                                                                                                |
| DG8 | Digestive alterations | 5562  | Ulcerative (chronic) proctitis                                                                                                                  |
| DG8 | Digestive alterations | 5563  | Ulcerative (chronic) proctosigmoiditis                                                                                                          |
| DG8 | Digestive alterations | 5564  | Pseudopolyposis of colon                                                                                                                        |

|     |                       |       |                                                                   |
|-----|-----------------------|-------|-------------------------------------------------------------------|
| DG8 | Digestive alterations | 5565  | Left-sided ulcerative (chronic) colitis                           |
| DG8 | Digestive alterations | 5566  | Universal ulcerative (chronic) colitis                            |
| DG8 | Digestive alterations | 5568  | Other ulcerative colitis                                          |
| DG8 | Digestive alterations | 5569  | Ulcerative colitis, unspecified                                   |
| DG8 | Digestive alterations | 5584  | Eosinophilic gastroenteritis and colitis                          |
| DG8 | Digestive alterations | 55841 | Eosinophilic gastroenteritis                                      |
| DG8 | Digestive alterations | 55842 | Eosinophilic colitis                                              |
| DG8 | Digestive alterations | 562   | Diverticula of intestine                                          |
| DG8 | Digestive alterations | 5620  | Small intestine                                                   |
| DG8 | Digestive alterations | 56200 | Diverticulosis of small intestine (without mention of hemorrhage) |
| DG8 | Digestive alterations | 56201 | Diverticulitis of small intestine (without mention of hemorrhage) |
| DG8 | Digestive alterations | 56202 | Diverticulosis of small intestine with hemorrhage                 |
| DG8 | Digestive alterations | 56203 | Diverticulitis of small intestine with hemorrhage                 |
| DG8 | Digestive alterations | 5621  | Colon                                                             |
| DG8 | Digestive alterations | 56210 | Diverticulosis of colon (without mention of hemorrhage)           |
| DG8 | Digestive alterations | 56211 | Diverticulitis of colon (without mention of hemorrhage)           |
| DG8 | Digestive alterations | 56212 | Diverticulosis of colon with hemorrhage                           |
| DG8 | Digestive alterations | 56213 | Diverticulitis of colon with hemorrhage                           |
| DG8 | Digestive alterations | 5641  | Irritable bowel syndrome                                          |
| DG8 | Digestive alterations | 56481 | Neurogenic bowel                                                  |
| DG8 | Digestive alterations | 5696  | Colostomy and enterostomy complications                           |
| DG8 | Digestive alterations | 56960 | Colostomy and enterostomy complication, unspecified               |
| DG8 | Digestive alterations | 56961 | Infection of colostomy or enterostomy                             |
| DG8 | Digestive alterations | 56962 | Mechanical complication of colostomy and enterostomy              |
| DG8 | Digestive alterations | 56969 | Other colostomy and enterostomy complication                      |
| DG8 | Digestive alterations | 571   | Chronic liver disease and cirrhosis                               |
| DG8 | Digestive alterations | 5710  | Alcoholic fatty liver                                             |
| DG8 | Digestive alterations | 5711  | Acute alcoholic hepatitis                                         |
| DG8 | Digestive alterations | 5712  | Alcoholic cirrhosis of liver                                      |
| DG8 | Digestive alterations | 5713  | Alcoholic liver damage, unspecified                               |
| DG8 | Digestive alterations | 5714  | Chronic hepatitis                                                 |
| DG8 | Digestive alterations | 57140 | Chronic hepatitis, unspecified                                    |
| DG8 | Digestive alterations | 57141 | Chronic persistent hepatitis                                      |
| DG8 | Digestive alterations | 57142 | Autoimmune hepatitis                                              |
| DG8 | Digestive alterations | 57149 | Other chronic hepatitis                                           |
| DG8 | Digestive alterations | 5715  | Cirrhosis of liver without mention of alcohol                     |
| DG8 | Digestive alterations | 5716  | Biliary cirrhosis                                                 |
| DG8 | Digestive alterations | 5718  | Other chronic nonalcoholic liver disease                          |
| DG8 | Digestive alterations | 5719  | Unspecified chronic liver disease without mention of alcohol      |
| DG8 | Digestive alterations | 5723  | Portal hypertension                                               |
| DG8 | Digestive alterations | 5724  | Hepatorenal syndrome                                              |
| DG8 | Digestive alterations | 5728  | Other sequelae of chronic liver disease                           |
| DG8 | Digestive alterations | 573   | Other disorders of liver                                          |
| DG8 | Digestive alterations | 5730  | Chronic passive congestion of liver                               |
| DG8 | Digestive alterations | 5731  | Hepatitis in viral diseases classified elsewhere                  |

|     |                       |       |                                                                                                                     |
|-----|-----------------------|-------|---------------------------------------------------------------------------------------------------------------------|
| DG8 | Digestive alterations | 5732  | Hepatitis in other infectious diseases classified elsewhere                                                         |
| DG8 | Digestive alterations | 5733  | Hepatitis, unspecified                                                                                              |
| DG8 | Digestive alterations | 5734  | Hepatic infarction                                                                                                  |
| DG8 | Digestive alterations | 5735  | Hepatopulmonary syndrome                                                                                            |
| DG8 | Digestive alterations | 5738  | Other specified disorders of liver                                                                                  |
| DG8 | Digestive alterations | 5739  | Unspecified disorder of liver                                                                                       |
| DG8 | Digestive alterations | 5771  | Chronic pancreatitis                                                                                                |
| DG8 | Digestive alterations | 5790  | Celiac disease                                                                                                      |
| DG8 | Digestive alterations | 5792  | Blind loop syndrome                                                                                                 |
| DG8 | Digestive alterations | 5793  | Other and unspecified postsurgical nonabsorption                                                                    |
| DG8 | Digestive alterations | 5794  | Pancreatic steatorrhea                                                                                              |
| DG8 | Digestive alterations | 5798  | Other specified intestinal malabsorption                                                                            |
| DG8 | Digestive alterations | 5799  | Unspecified intestinal malabsorption                                                                                |
| DG8 | Digestive alterations | 750   | Other congenital anomalies of upper alimentary tract                                                                |
| DG8 | Digestive alterations | 7500  | Tongue tie                                                                                                          |
| DG8 | Digestive alterations | 7501  | Other anomalies of tongue                                                                                           |
| DG8 | Digestive alterations | 75010 | Congenital anomaly of tongue, unspecified                                                                           |
| DG8 | Digestive alterations | 75011 | Aglossia                                                                                                            |
| DG8 | Digestive alterations | 75012 | Congenital adhesions of tongue                                                                                      |
| DG8 | Digestive alterations | 75013 | Fissure of tongue                                                                                                   |
| DG8 | Digestive alterations | 75015 | Macroglossia                                                                                                        |
| DG8 | Digestive alterations | 75016 | Microglossia                                                                                                        |
| DG8 | Digestive alterations | 75019 | Other congenital anomalies of tongue                                                                                |
| DG8 | Digestive alterations | 7502  | Other specified anomalies of mouth and pharynx                                                                      |
| DG8 | Digestive alterations | 75021 | Absence of salivary gland                                                                                           |
| DG8 | Digestive alterations | 75022 | Accessory salivary gland                                                                                            |
| DG8 | Digestive alterations | 75023 | Atresia, salivary duct                                                                                              |
| DG8 | Digestive alterations | 75024 | Congenital fistula of salivary gland                                                                                |
| DG8 | Digestive alterations | 75025 | Congenital fistula of lip                                                                                           |
| DG8 | Digestive alterations | 75026 | Other specified anomalies of mouth                                                                                  |
| DG8 | Digestive alterations | 75027 | Diverticulum of pharynx                                                                                             |
| DG8 | Digestive alterations | 75029 | Other specified anomalies of pharynx                                                                                |
| DG8 | Digestive alterations | 7503  | Tracheoesophageal fistula, esophageal atresia and stenosis                                                          |
| DG8 | Digestive alterations | 7504  | Other specified anomalies of esophagus                                                                              |
| DG8 | Digestive alterations | 7505  | Congenital hypertrophic pyloric stenosis                                                                            |
| DG8 | Digestive alterations | 7506  | Congenital hiatus hernia                                                                                            |
| DG8 | Digestive alterations | 7507  | Other specified anomalies of stomach                                                                                |
| DG8 | Digestive alterations | 7508  | Other specified anomalies of upper alimentary tract                                                                 |
| DG8 | Digestive alterations | 7509  | Unspecified anomaly of upper alimentary tract                                                                       |
| DG8 | Digestive alterations | 7876  | Incontinence of feces                                                                                               |
| DG8 | Digestive alterations | 78951 | Malignant ascites                                                                                                   |
| DG9 | Trauma                | 887   | Traumatic amputation of arm and hand (complete) (partial)                                                           |
| DG9 | Trauma                | 8870  | Traumatic amputation of arm and hand (complete) (partial), unilateral, below elbow, without mention of complication |
| DG9 | Trauma                | 8871  | Traumatic amputation of arm and hand (complete) (partial), unilateral, below elbow, complicated                     |

|      |                                 |      |                                                                                                                             |
|------|---------------------------------|------|-----------------------------------------------------------------------------------------------------------------------------|
| DG9  | Trauma                          | 8872 | Traumatic amputation of arm and hand (complete) (partial), unilateral, at or above elbow, without mention of complication   |
| DG9  | Trauma                          | 8873 | Traumatic amputation of arm and hand (complete) (partial), unilateral, at or above elbow, complicated                       |
| DG9  | Trauma                          | 8874 | Traumatic amputation of arm and hand (complete) (partial), unilateral, level not specified, without mention of complication |
| DG9  | Trauma                          | 8875 | Traumatic amputation of arm and hand (complete) (partial), unilateral, level not specified, complicated                     |
| DG9  | Trauma                          | 8876 | Traumatic amputation of arm and hand (complete) (partial), bilateral [any level], without mention of complication           |
| DG9  | Trauma                          | 8877 | Traumatic amputation of arm and hand (complete) (partial), bilateral [any level], complicated                               |
| DG9  | Trauma                          | 896  | Traumatic amputation of foot (complete) (partial)                                                                           |
| DG9  | Trauma                          | 8960 | Traumatic amputation of foot (complete) (partial), unilateral, without mention of complication                              |
| DG9  | Trauma                          | 8961 | Traumatic amputation of foot (complete) (partial), unilateral, complicated                                                  |
| DG9  | Trauma                          | 8962 | Traumatic amputation of foot (complete) (partial), bilateral, without mention of complication                               |
| DG9  | Trauma                          | 8963 | Traumatic amputation of foot (complete) (partial), bilateral, complicated                                                   |
| DG9  | Trauma                          | 897  | Traumatic amputation of leg(s) (complete) (partial)                                                                         |
| DG9  | Trauma                          | 8970 | Traumatic amputation of leg(s) (complete) (partial), unilateral, below knee, without mention of complication                |
| DG9  | Trauma                          | 8971 | Traumatic amputation of leg(s) (complete) (partial), unilateral, below knee, complicated                                    |
| DG9  | Trauma                          | 8972 | Traumatic amputation of leg(s) (complete) (partial), unilateral, at or above knee, without mention of complication          |
| DG9  | Trauma                          | 8973 | Traumatic amputation of leg(s) (complete) (partial), unilateral, at or above knee, complicated                              |
| DG9  | Trauma                          | 8974 | Traumatic amputation of leg(s) (complete) (partial), unilateral, level not specified, without mention of complication       |
| DG9  | Trauma                          | 8975 | Traumatic amputation of leg(s) (complete) (partial), unilateral, level not specified, complicated                           |
| DG9  | Trauma                          | 8976 | Traumatic amputation of leg(s) (complete) (partial), bilateral [any level]), without mention of complication                |
| DG9  | Trauma                          | 8977 | Traumatic amputation of leg(s) (complete) (partial), bilateral [any level], complicated                                     |
| DG10 | Genitalia and urinary disorders | 257  | Testicular dysfunction                                                                                                      |
| DG10 | Genitalia and urinary disorders | 2570 | Testicular hyperfunction                                                                                                    |
| DG10 | Genitalia and urinary disorders | 2571 | Postablative testicular hypofunction                                                                                        |
| DG10 | Genitalia and urinary disorders | 2572 | Other testicular hypofunction                                                                                               |



|      |                                 |       |                                                                                                                    |
|------|---------------------------------|-------|--------------------------------------------------------------------------------------------------------------------|
| DG10 | Genitalia and urinary disorders | 2578  | Other testicular dysfunction                                                                                       |
| DG10 | Genitalia and urinary disorders | 2579  | Unspecified testicular dysfunction                                                                                 |
| DG10 | Genitalia and urinary disorders | 600   | Hyperplasia of prostate                                                                                            |
| DG10 | Genitalia and urinary disorders | 6000  | Hypertrophy (benign) of prostate                                                                                   |
| DG10 | Genitalia and urinary disorders | 60000 | Hypertrophy (benign) of prostate without urinary obstruction and other lower urinary tract symptom (LUTS)          |
| DG10 | Genitalia and urinary disorders | 60001 | Hypertrophy (benign) of prostate with urinary obstruction and other lower urinary tract symptoms (LUTS)            |
| DG10 | Genitalia and urinary disorders | 6001  | Nodular prostate                                                                                                   |
| DG10 | Genitalia and urinary disorders | 60010 | Nodular prostate without urinary obstruction                                                                       |
| DG10 | Genitalia and urinary disorders | 60011 | Nodular prostate with urinary obstruction                                                                          |
| DG10 | Genitalia and urinary disorders | 6002  | Benign localized hyperplasia of prostate                                                                           |
| DG10 | Genitalia and urinary disorders | 60020 | Benign localized hyperplasia of prostate without urinary obstruction and other lower urinary tract symptoms (LUTS) |
| DG10 | Genitalia and urinary disorders | 60021 | Benign localized hyperplasia of prostate with urinary obstruction and other lower urinary tract symptoms (LUTS)    |
| DG10 | Genitalia and urinary disorders | 6003  | Cyst of prostate                                                                                                   |
| DG10 | Genitalia and urinary disorders | 6009  | Hyperplasia of prostate, unspecified                                                                               |
| DG10 | Genitalia and urinary disorders | 60090 | Hyperplasia of prostate, unspecified, without urinary obstruction and other lower urinary symptoms (LUTS)          |
| DG10 | Genitalia and urinary disorders | 60091 | Hyperplasia of prostate, unspecified, with urinary obstruction and other lower urinary symptoms (LUTS)             |
| DG10 | Genitalia and urinary disorders | 7883  | Urinary incontinence                                                                                               |
| DG10 | Genitalia and urinary disorders | 78830 | Urinary incontinence, unspecified                                                                                  |
| DG10 | Genitalia and urinary disorders | 78831 | Urge incontinence                                                                                                  |
| DG10 | Genitalia and urinary disorders | 78832 | Stress incontinence, male                                                                                          |
| DG10 | Genitalia and urinary disorders | 78833 | Mixed incontinence (male) (female)                                                                                 |
| DG10 | Genitalia and urinary disorders | 78834 | Incontinence without sensory awareness                                                                             |
| DG10 | Genitalia and urinary disorders | 78835 | Post-void dribbling                                                                                                |
| DG10 | Genitalia and urinary disorders | 78836 | Nocturnal enuresis                                                                                                 |
| DG10 | Genitalia and urinary disorders | 78837 | Continuous leakage                                                                                                 |

|      |                                 |       |                                                                                                              |
|------|---------------------------------|-------|--------------------------------------------------------------------------------------------------------------|
| DG10 | Genitalia and urinary disorders | 78838 | Overflow incontinence                                                                                        |
| DG10 | Genitalia and urinary disorders | 78839 | Other urinary incontinence                                                                                   |
| DG10 | Genitalia and urinary disorders | 78891 | Functional urinary incontinence                                                                              |
| DG11 | Circulation disorders           | 433   | Occlusion and stenosis of precerebral arteries                                                               |
| DG11 | Circulation disorders           | 4330  | Basilar artery                                                                                               |
| DG11 | Circulation disorders           | 43300 | Occlusion and stenosis of basilar artery without mention of cerebral infarction                              |
| DG11 | Circulation disorders           | 43301 | Occlusion and stenosis of basilar artery with cerebral infarction                                            |
| DG11 | Circulation disorders           | 4331  | Carotid artery                                                                                               |
| DG11 | Circulation disorders           | 43310 | Occlusion and stenosis of carotid artery without mention of cerebral infarction                              |
| DG11 | Circulation disorders           | 43311 | Occlusion and stenosis of carotid artery with cerebral infarction                                            |
| DG11 | Circulation disorders           | 4332  | Vertebral artery                                                                                             |
| DG11 | Circulation disorders           | 43320 | Occlusion and stenosis of vertebral artery without mention of cerebral infarction                            |
| DG11 | Circulation disorders           | 43321 | Occlusion and stenosis of vertebral artery with cerebral infarction                                          |
| DG11 | Circulation disorders           | 4333  | Multiple and bilateral                                                                                       |
| DG11 | Circulation disorders           | 43330 | Occlusion and stenosis of multiple and bilateral precerebral arteries without mention of cerebral infarction |
| DG11 | Circulation disorders           | 43331 | Occlusion and stenosis of multiple and bilateral precerebral arteries with cerebral infarction               |
| DG11 | Circulation disorders           | 4338  | Other specified precerebral artery                                                                           |
| DG11 | Circulation disorders           | 43380 | Occlusion and stenosis of other specified precerebral artery without mention of cerebral infarction          |
| DG11 | Circulation disorders           | 43381 | Occlusion and stenosis of other specified precerebral artery with cerebral infarction                        |
| DG11 | Circulation disorders           | 4339  | Unspecified precerebral artery                                                                               |
| DG11 | Circulation disorders           | 43390 | Occlusion and stenosis of unspecified precerebral artery without mention of cerebral infarction              |
| DG11 | Circulation disorders           | 43391 | Occlusion and stenosis of unspecified precerebral artery with cerebral infarction                            |
| DG11 | Circulation disorders           | 437   | Other and ill-defined cerebrovascular disease                                                                |
| DG11 | Circulation disorders           | 4370  | Cerebral atherosclerosis                                                                                     |
| DG11 | Circulation disorders           | 4371  | Other generalized ischemic cerebrovascular disease                                                           |
| DG11 | Circulation disorders           | 4372  | Hypertensive encephalopathy                                                                                  |
| DG11 | Circulation disorders           | 4373  | Cerebral aneurysm, nonruptured                                                                               |
| DG11 | Circulation disorders           | 4374  | Cerebral arteritis                                                                                           |
| DG11 | Circulation disorders           | 4375  | Moyamoya disease                                                                                             |
| DG11 | Circulation disorders           | 4376  | Nonpyogenic thrombosis of intracranial venous sinus                                                          |
| DG11 | Circulation disorders           | 4377  | Transient global amnesia                                                                                     |
| DG11 | Circulation disorders           | 4378  | Other ill-defined cerebrovascular disease                                                                    |
| DG11 | Circulation disorders           | 4379  | Unspecified cerebrovascular disease                                                                          |
| DG11 | Circulation disorders           | 441   | Aortic aneurysm and dissection                                                                               |

|      |                       |       |                                                                |
|------|-----------------------|-------|----------------------------------------------------------------|
| DG11 | Circulation disorders | 4410  | Dissection of aorta                                            |
| DG11 | Circulation disorders | 44100 | Dissection of aorta, unspecified site                          |
| DG11 | Circulation disorders | 44101 | Dissection of aorta, thoracic                                  |
| DG11 | Circulation disorders | 44102 | Dissection of aorta, abdominal                                 |
| DG11 | Circulation disorders | 44103 | Dissection of aorta, thoracoabdominal                          |
| DG11 | Circulation disorders | 4411  | Thoracic aneurysm, ruptured                                    |
| DG11 | Circulation disorders | 4412  | Thoracic aneurysm without mention of rupture                   |
| DG11 | Circulation disorders | 4413  | Abdominal aneurysm, ruptured                                   |
| DG11 | Circulation disorders | 4414  | Abdominal aneurysm without mention of rupture                  |
| DG11 | Circulation disorders | 4415  | Aortic aneurysm of unspecified site, ruptured                  |
| DG11 | Circulation disorders | 4416  | Thoracoabdominal aneurysm, ruptured                            |
| DG11 | Circulation disorders | 4417  | Thoracoabdominal aneurysm, without mention of rupture          |
| DG11 | Circulation disorders | 4419  | Aortic aneurysm of unspecified site without mention of rupture |
| DG11 | Circulation disorders | 442   | Other aneurysm                                                 |
| DG11 | Circulation disorders | 4420  | Aneurysm of artery of upper extremity                          |
| DG11 | Circulation disorders | 4421  | Aneurysm of renal artery                                       |
| DG11 | Circulation disorders | 4422  | Aneurysm of iliac artery                                       |
| DG11 | Circulation disorders | 4423  | Aneurysm of artery of lower extremity                          |
| DG11 | Circulation disorders | 4428  | Of other specified artery                                      |
| DG11 | Circulation disorders | 44281 | Aneurysm of artery of neck                                     |
| DG11 | Circulation disorders | 44282 | Aneurysm of subclavian artery                                  |
| DG11 | Circulation disorders | 44283 | Aneurysm of splenic artery                                     |
| DG11 | Circulation disorders | 44284 | Aneurysm of other visceral artery                              |
| DG11 | Circulation disorders | 44289 | Aneurysm of other specified artery                             |
| DG11 | Circulation disorders | 4429  | Aneurysm of unspecified site                                   |
| DG11 | Circulation disorders | 443   | Other peripheral vascular disease                              |
| DG11 | Circulation disorders | 4430  | Raynaud's syndrome                                             |
| DG11 | Circulation disorders | 4431  | Thromboangiitis obliterans [Buerger's disease]                 |
| DG11 | Circulation disorders | 4432  | Other arterial dissection                                      |
| DG11 | Circulation disorders | 44321 | Dissection of carotid artery                                   |
| DG11 | Circulation disorders | 44322 | Dissection of iliac artery                                     |
| DG11 | Circulation disorders | 44323 | Dissection of renal artery                                     |
| DG11 | Circulation disorders | 44324 | Dissection of vertebral artery                                 |
| DG11 | Circulation disorders | 44329 | Dissection of other artery                                     |
| DG11 | Circulation disorders | 4438  | Other specified peripheral vascular diseases                   |
| DG11 | Circulation disorders | 44381 | Peripheral angiopathy in diseases classified elsewhere         |
| DG11 | Circulation disorders | 44382 | Erythromelalgia                                                |
| DG11 | Circulation disorders | 44389 | Other specified peripheral vascular diseases                   |
| DG11 | Circulation disorders | 4439  | Peripheral vascular disease, unspecified                       |
| DG11 | Circulation disorders | 444   | Arterial embolism and thrombosis                               |
| DG11 | Circulation disorders | 4440  | Of abdominal aorta                                             |
| DG11 | Circulation disorders | 44401 | Saddle embolus of abdominal aorta                              |
| DG11 | Circulation disorders | 44409 | Other arterial embolism and thrombosis of abdominal aorta      |
| DG11 | Circulation disorders | 4441  | Embolism and thrombosis of thoracic aorta                      |
| DG11 | Circulation disorders | 4442  | Of arteries of the extremities                                 |

|      |                       |       |                                                                                       |
|------|-----------------------|-------|---------------------------------------------------------------------------------------|
| DG11 | Circulation disorders | 44421 | Arterial embolism and thrombosis of upper extremity                                   |
| DG11 | Circulation disorders | 44422 | Arterial embolism and thrombosis of lower extremity                                   |
| DG11 | Circulation disorders | 4448  | Of other specified artery                                                             |
| DG11 | Circulation disorders | 44481 | Embolism and thrombosis of iliac artery                                               |
| DG11 | Circulation disorders | 44489 | Embolism and thrombosis of other specified artery                                     |
| DG11 | Circulation disorders | 4449  | Embolism and thrombosis of unspecified artery                                         |
| DG11 | Circulation disorders | 447   | Other disorders of arteries and arterioles                                            |
| DG11 | Circulation disorders | 4470  | Arteriovenous fistula, acquired                                                       |
| DG11 | Circulation disorders | 4471  | Stricture of artery                                                                   |
| DG11 | Circulation disorders | 4472  | Rupture of artery                                                                     |
| DG11 | Circulation disorders | 4473  | Hyperplasia of renal artery                                                           |
| DG11 | Circulation disorders | 4474  | Celiac artery compression syndrome                                                    |
| DG11 | Circulation disorders | 4475  | Necrosis of artery                                                                    |
| DG11 | Circulation disorders | 4476  | Arteritis, unspecified                                                                |
| DG11 | Circulation disorders | 4477  | Aortic ectasia                                                                        |
| DG11 | Circulation disorders | 44770 | Aortic ectasia, unspecified site                                                      |
| DG11 | Circulation disorders | 44771 | Thoracic aortic ectasia                                                               |
| DG11 | Circulation disorders | 44772 | Abdominal aortic ectasia                                                              |
| DG11 | Circulation disorders | 44773 | Thoracoabdominal aortic ectasia                                                       |
| DG11 | Circulation disorders | 4478  | Other specified disorders of arteries and arterioles                                  |
| DG11 | Circulation disorders | 4479  | Unspecified disorders of arteries and arterioles                                      |
| DG11 | Circulation disorders | 4480  | Hereditary hemorrhagic telangiectasia                                                 |
| DG11 | Circulation disorders | 4530  | Budd-chiari syndrome                                                                  |
| DG11 | Circulation disorders | 4531  | Thrombophlebitis migrans                                                              |
| DG11 | Circulation disorders | 4532  | Other venous embolism and thrombosis of inferior vena cava                            |
| DG11 | Circulation disorders | 4533  | Other venous embolism and thrombosis of renal vein                                    |
| DG11 | Circulation disorders | 4535  | Chronic venous embolism and thrombosis of deep vessels of lower extremity             |
| DG11 | Circulation disorders | 45350 | Chronic venous embolism and thrombosis of unspecified deep vessels of lower extremity |
| DG11 | Circulation disorders | 45351 | Chronic venous embolism and thrombosis of deep vessels of proximal lower extremity    |
| DG11 | Circulation disorders | 45352 | Chronic venous embolism and thrombosis of deep vessels of distal lower extremity      |
| DG11 | Circulation disorders | 4537  | Chronic venous embolism and thrombosis of other specified vessels                     |
| DG11 | Circulation disorders | 45371 | Chronic venous embolism and thrombosis of superficial veins of upper extremity        |
| DG11 | Circulation disorders | 45372 | Chronic venous embolism and thrombosis of deep veins of upper extremity               |
| DG11 | Circulation disorders | 45373 | Chronic venous embolism and thrombosis of upper extremity, unspecified                |
| DG11 | Circulation disorders | 45374 | Chronic venous embolism and thrombosis of axillary veins                              |
| DG11 | Circulation disorders | 45375 | Chronic venous embolism and thrombosis of subclavian veins                            |
| DG11 | Circulation disorders | 45376 | Chronic venous embolism and thrombosis of internal jugular veins                      |

|      |                                  |       |                                                                    |
|------|----------------------------------|-------|--------------------------------------------------------------------|
| DG11 | Circulation disorders            | 45377 | Chronic venous embolism and thrombosis of other thoracic veins     |
| DG11 | Circulation disorders            | 45379 | Chronic venous embolism and thrombosis of other specified veins    |
| DG11 | Circulation disorders            | 45821 | Hypotension of hemodialysis                                        |
| DG11 | Circulation disorders            | 4591  | Postphlebotic syndrome                                             |
| DG11 | Circulation disorders            | 45910 | Postphlebotic syndrome without complications                       |
| DG11 | Circulation disorders            | 45911 | Postphlebotic syndrome with ulcer                                  |
| DG11 | Circulation disorders            | 45912 | Postphlebotic syndrome with inflammation                           |
| DG11 | Circulation disorders            | 45913 | Postphlebotic syndrome with ulcer and inflammation                 |
| DG11 | Circulation disorders            | 45919 | Postphlebotic syndrome with other complication                     |
| DG11 | Circulation disorders            | 4593  | Chronic venous hypertension (idiopathic)                           |
| DG11 | Circulation disorders            | 45930 | Chronic venous hypertension without complications                  |
| DG11 | Circulation disorders            | 45931 | Chronic venous hypertension with ulcer                             |
| DG11 | Circulation disorders            | 45932 | Chronic venous hypertension with inflammation                      |
| DG11 | Circulation disorders            | 45933 | Chronic venous hypertension with ulcer and inflammation            |
| DG11 | Circulation disorders            | 45939 | Chronic venous hypertension with other complication                |
| DG11 | Circulation disorders            | 5571  | Chronic vascular insufficiency of intestine                        |
| DG11 | Circulation disorders            | 5579  | Unspecified vascular insufficiency of intestine                    |
| DG12 | Tuberculosis related alterations | 137   | Late effects of tuberculosis                                       |
| DG12 | Tuberculosis related alterations | 1370  | Late effects of respiratory or unspecified tuberculosis            |
| DG12 | Tuberculosis related alterations | 1371  | Late effects of central nervous system tuberculosis                |
| DG12 | Tuberculosis related alterations | 1372  | Late effects of genitourinary tuberculosis                         |
| DG12 | Tuberculosis related alterations | 1373  | Late effects of tuberculosis of bones and joints                   |
| DG12 | Tuberculosis related alterations | 1374  | Late effects of tuberculosis of other specified organs             |
| DG13 | Intoxication/poisoning           | 984   | Toxic effect of lead and its compounds (including fumes)           |
| DG13 | Intoxication/poisoning           | 9840  | Toxic effect of inorganic lead compounds                           |
| DG13 | Intoxication/poisoning           | 9841  | Toxic effect of organic lead compounds                             |
| DG13 | Intoxication/poisoning           | 9848  | Toxic effect of other lead compounds                               |
| DG13 | Intoxication/poisoning           | 9849  | Toxic effect of unspecified lead compound                          |
| DG13 | Intoxication/poisoning           | 985   | Toxic effect of other metals                                       |
| DG13 | Intoxication/poisoning           | 9850  | Toxic effect of mercury and its compounds                          |
| DG13 | Intoxication/poisoning           | 9851  | Toxic effect of arsenic and its compounds                          |
| DG13 | Intoxication/poisoning           | 9852  | Toxic effect of manganese and its compounds                        |
| DG13 | Intoxication/poisoning           | 9853  | Toxic effect of beryllium and its compounds                        |
| DG13 | Intoxication/poisoning           | 9854  | Toxic effect of antimony and its compounds                         |
| DG13 | Intoxication/poisoning           | 9855  | Toxic effect of cadmium and its compounds                          |
| DG13 | Intoxication/poisoning           | 9856  | Toxic effect of chromium                                           |
| DG13 | Intoxication/poisoning           | 9858  | Toxic effect of other specified metals                             |
| DG13 | Intoxication/poisoning           | 9859  | Toxic effect of unspecified metal                                  |
| DG14 | Psychiatric disorders            | 294   | Persistent mental disorders due to conditions classified elsewhere |

|      |                       |       |                                                                                |
|------|-----------------------|-------|--------------------------------------------------------------------------------|
| DG14 | Psychiatric disorders | 2940  | Amnestic disorder in conditions classified elsewhere                           |
| DG14 | Psychiatric disorders | 2941  | Dementia in conditions classified elsewhere                                    |
| DG14 | Psychiatric disorders | 29410 | Dementia in conditions classified elsewhere without behavioral disturbance     |
| DG14 | Psychiatric disorders | 29411 | Dementia in conditions classified elsewhere with behavioral disturbance        |
| DG14 | Psychiatric disorders | 2942  | Dementia, unspecified                                                          |
| DG14 | Psychiatric disorders | 29420 | Dementia, unspecified, without behavioral disturbance                          |
| DG14 | Psychiatric disorders | 29421 | Dementia, unspecified, with behavioral disturbance                             |
| DG14 | Psychiatric disorders | 2948  | Other persistent mental disorders due to conditions classified elsewhere       |
| DG14 | Psychiatric disorders | 2949  | Unspecified persistent mental disorders due to conditions classified elsewhere |
| DG14 | Psychiatric disorders | 295   | Schizophrenic disorders                                                        |
| DG14 | Psychiatric disorders | 2950  | Simple type                                                                    |
| DG14 | Psychiatric disorders | 29500 | Simple type schizophrenia, unspecified                                         |
| DG14 | Psychiatric disorders | 29501 | Simple type schizophrenia, subchronic                                          |
| DG14 | Psychiatric disorders | 29502 | Simple type schizophrenia, chronic                                             |
| DG14 | Psychiatric disorders | 29503 | Simple type schizophrenia, subchronic with acute exacerbation                  |
| DG14 | Psychiatric disorders | 29504 | Simple type schizophrenia, chronic with acute exacerbation                     |
| DG14 | Psychiatric disorders | 29505 | Simple type schizophrenia, in remission                                        |
| DG14 | Psychiatric disorders | 2951  | Disorganized type                                                              |
| DG14 | Psychiatric disorders | 29510 | Disorganized type schizophrenia, unspecified                                   |
| DG14 | Psychiatric disorders | 29511 | Disorganized type schizophrenia, subchronic                                    |
| DG14 | Psychiatric disorders | 29512 | Disorganized type schizophrenia, chronic                                       |
| DG14 | Psychiatric disorders | 29513 | Disorganized type schizophrenia, subchronic with acute exacerbation            |
| DG14 | Psychiatric disorders | 29514 | Disorganized type schizophrenia, chronic with acute exacerbation               |
| DG14 | Psychiatric disorders | 29515 | Disorganized type schizophrenia, in remission                                  |
| DG14 | Psychiatric disorders | 2952  | Catatonic type                                                                 |
| DG14 | Psychiatric disorders | 29520 | Catatonic type schizophrenia, unspecified                                      |
| DG14 | Psychiatric disorders | 29521 | Catatonic type schizophrenia, subchronic                                       |
| DG14 | Psychiatric disorders | 29522 | Catatonic type schizophrenia, chronic                                          |
| DG14 | Psychiatric disorders | 29523 | Catatonic type schizophrenia, subchronic with acute exacerbation               |
| DG14 | Psychiatric disorders | 29524 | Catatonic type schizophrenia, chronic with acute exacerbation                  |
| DG14 | Psychiatric disorders | 29525 | Catatonic type schizophrenia, in remission                                     |
| DG14 | Psychiatric disorders | 2953  | Paranoid type                                                                  |
| DG14 | Psychiatric disorders | 29530 | Paranoid type schizophrenia, unspecified                                       |
| DG14 | Psychiatric disorders | 29531 | Paranoid type schizophrenia, subchronic                                        |
| DG14 | Psychiatric disorders | 29532 | Paranoid type schizophrenia, chronic                                           |
| DG14 | Psychiatric disorders | 29533 | Paranoid type schizophrenia, subchronic with acute exacerbation                |
| DG14 | Psychiatric disorders | 29534 | Paranoid type schizophrenia, chronic with acute exacerbation                   |

|      |                       |       |                                                                            |
|------|-----------------------|-------|----------------------------------------------------------------------------|
| DG14 | Psychiatric disorders | 29535 | Paranoid type schizophrenia, in remission                                  |
| DG14 | Psychiatric disorders | 2954  | Schizophreniform disorder                                                  |
| DG14 | Psychiatric disorders | 29540 | Schizophreniform disorder, unspecified                                     |
| DG14 | Psychiatric disorders | 29541 | Schizophreniform disorder, subchronic                                      |
| DG14 | Psychiatric disorders | 29542 | Schizophreniform disorder, chronic                                         |
| DG14 | Psychiatric disorders | 29543 | Schizophreniform disorder, subchronic with acute exacerbation              |
| DG14 | Psychiatric disorders | 29544 | Schizophreniform disorder, chronic with acute exacerbation                 |
| DG14 | Psychiatric disorders | 29545 | Schizophreniform disorder, in remission                                    |
| DG14 | Psychiatric disorders | 2955  | Latent schizophrenia                                                       |
| DG14 | Psychiatric disorders | 29550 | Latent schizophrenia, unspecified                                          |
| DG14 | Psychiatric disorders | 29551 | Latent schizophrenia, subchronic                                           |
| DG14 | Psychiatric disorders | 29552 | Latent schizophrenia, chronic                                              |
| DG14 | Psychiatric disorders | 29553 | Latent schizophrenia, subchronic with acute exacerbation                   |
| DG14 | Psychiatric disorders | 29554 | Latent schizophrenia, chronic with acute exacerbation                      |
| DG14 | Psychiatric disorders | 29555 | Latent schizophrenia, in remission                                         |
| DG14 | Psychiatric disorders | 2956  | Residual type                                                              |
| DG14 | Psychiatric disorders | 29560 | Schizophrenic disorders, residual type, unspecified                        |
| DG14 | Psychiatric disorders | 29561 | Schizophrenic disorders, residual type, subchronic                         |
| DG14 | Psychiatric disorders | 29562 | Schizophrenic disorders, residual type, chronic                            |
| DG14 | Psychiatric disorders | 29563 | Schizophrenic disorders, residual type, subchronic with acute exacerbation |
| DG14 | Psychiatric disorders | 29564 | Schizophrenic disorders, residual type, chronic with acute exacerbation    |
| DG14 | Psychiatric disorders | 29565 | Schizophrenic disorders, residual type, in remission                       |
| DG14 | Psychiatric disorders | 2957  | Schizoaffective disorder                                                   |
| DG14 | Psychiatric disorders | 29570 | Schizoaffective disorder, unspecified                                      |
| DG14 | Psychiatric disorders | 29571 | Schizoaffective disorder, subchronic                                       |
| DG14 | Psychiatric disorders | 29572 | Schizoaffective disorder, chronic                                          |
| DG14 | Psychiatric disorders | 29573 | Schizoaffective disorder, subchronic with acute exacerbation               |
| DG14 | Psychiatric disorders | 29574 | Schizoaffective disorder, chronic with acute exacerbation                  |
| DG14 | Psychiatric disorders | 29575 | Schizoaffective disorder, in remission                                     |
| DG14 | Psychiatric disorders | 2958  | Other specified types of schizophrenia                                     |
| DG14 | Psychiatric disorders | 29580 | Other specified types of schizophrenia, unspecified                        |
| DG14 | Psychiatric disorders | 29581 | Other specified types of schizophrenia, subchronic                         |
| DG14 | Psychiatric disorders | 29582 | Other specified types of schizophrenia, chronic                            |
| DG14 | Psychiatric disorders | 29583 | Other specified types of schizophrenia, subchronic with acute exacerbation |
| DG14 | Psychiatric disorders | 29584 | Other specified types of schizophrenia, chronic with acute exacerbation    |
| DG14 | Psychiatric disorders | 29585 | Other specified types of schizophrenia, in remission                       |
| DG14 | Psychiatric disorders | 2959  | Unspecified schizophrenia                                                  |
| DG14 | Psychiatric disorders | 29590 | Unspecified schizophrenia, unspecified                                     |
| DG14 | Psychiatric disorders | 29591 | Unspecified schizophrenia, subchronic                                      |
| DG14 | Psychiatric disorders | 29592 | Unspecified schizophrenia, chronic                                         |

|      |                       |       |                                                                                                       |
|------|-----------------------|-------|-------------------------------------------------------------------------------------------------------|
| DG14 | Psychiatric disorders | 29593 | Unspecified schizophrenia, subchronic with acute exacerbation                                         |
| DG14 | Psychiatric disorders | 29594 | Unspecified schizophrenia, chronic with acute exacerbation                                            |
| DG14 | Psychiatric disorders | 29595 | Unspecified schizophrenia, in remission                                                               |
| DG14 | Psychiatric disorders | 296   | Episodic mood disorders                                                                               |
| DG14 | Psychiatric disorders | 2960  | Bipolar I disorder, single manic episode                                                              |
| DG14 | Psychiatric disorders | 29600 | Bipolar I disorder, single manic episode, unspecified                                                 |
| DG14 | Psychiatric disorders | 29601 | Bipolar I disorder, single manic episode, mild                                                        |
| DG14 | Psychiatric disorders | 29602 | Bipolar I disorder, single manic episode, moderate                                                    |
| DG14 | Psychiatric disorders | 29603 | Bipolar I disorder, single manic episode, severe, without mention of psychotic behavior               |
| DG14 | Psychiatric disorders | 29604 | Bipolar I disorder, single manic episode, severe, specified as with psychotic behavior                |
| DG14 | Psychiatric disorders | 29605 | Bipolar I disorder, single manic episode, in partial or unspecified remission                         |
| DG14 | Psychiatric disorders | 29606 | Bipolar I disorder, single manic episode, in full remission                                           |
| DG14 | Psychiatric disorders | 2961  | Manic disorder, recurrent episode                                                                     |
| DG14 | Psychiatric disorders | 29610 | Manic affective disorder, recurrent episode, unspecified                                              |
| DG14 | Psychiatric disorders | 29611 | Manic affective disorder, recurrent episode, mild                                                     |
| DG14 | Psychiatric disorders | 29612 | Manic affective disorder, recurrent episode, moderate                                                 |
| DG14 | Psychiatric disorders | 29613 | Manic affective disorder, recurrent episode, severe, without mention of psychotic behavior            |
| DG14 | Psychiatric disorders | 29614 | Manic affective disorder, recurrent episode, severe, specified as with psychotic behavior             |
| DG14 | Psychiatric disorders | 29615 | Manic affective disorder, recurrent episode, in partial or unspecified remission                      |
| DG14 | Psychiatric disorders | 29616 | Manic affective disorder, recurrent episode, in full remission                                        |
| DG14 | Psychiatric disorders | 2962  | Major depressive disorder, single episode                                                             |
| DG14 | Psychiatric disorders | 29620 | Major depressive affective disorder, single episode, unspecified                                      |
| DG14 | Psychiatric disorders | 29621 | Major depressive affective disorder, single episode, mild                                             |
| DG14 | Psychiatric disorders | 29622 | Major depressive affective disorder, single episode, moderate                                         |
| DG14 | Psychiatric disorders | 29623 | Major depressive affective disorder, single episode, severe, without mention of psychotic behavior    |
| DG14 | Psychiatric disorders | 29624 | Major depressive affective disorder, single episode, severe, specified as with psychotic behavior     |
| DG14 | Psychiatric disorders | 29625 | Major depressive affective disorder, single episode, in partial or unspecified remission              |
| DG14 | Psychiatric disorders | 29626 | Major depressive affective disorder, single episode, in full remission                                |
| DG14 | Psychiatric disorders | 2963  | Major depressive disorder, recurrent episode                                                          |
| DG14 | Psychiatric disorders | 29630 | Major depressive affective disorder, recurrent episode, unspecified                                   |
| DG14 | Psychiatric disorders | 29631 | Major depressive affective disorder, recurrent episode, mild                                          |
| DG14 | Psychiatric disorders | 29632 | Major depressive affective disorder, recurrent episode, moderate                                      |
| DG14 | Psychiatric disorders | 29633 | Major depressive affective disorder, recurrent episode, severe, without mention of psychotic behavior |



|      |                       |       |                                                                                                               |
|------|-----------------------|-------|---------------------------------------------------------------------------------------------------------------|
| DG14 | Psychiatric disorders | 29634 | Major depressive affective disorder, recurrent episode, severe, specified as with psychotic behavior          |
| DG14 | Psychiatric disorders | 29635 | Major depressive affective disorder, recurrent episode, in partial or unspecified remission                   |
| DG14 | Psychiatric disorders | 29636 | Major depressive affective disorder, recurrent episode, in full remission                                     |
| DG14 | Psychiatric disorders | 2964  | Bipolar I disorder, most recent episode (or current) manic                                                    |
| DG14 | Psychiatric disorders | 29640 | Bipolar I disorder, most recent episode (or current) manic, unspecified                                       |
| DG14 | Psychiatric disorders | 29641 | Bipolar I disorder, most recent episode (or current) manic, mild                                              |
| DG14 | Psychiatric disorders | 29642 | Bipolar I disorder, most recent episode (or current) manic, moderate                                          |
| DG14 | Psychiatric disorders | 29643 | Bipolar I disorder, most recent episode (or current) manic, severe, without mention of psychotic behavior     |
| DG14 | Psychiatric disorders | 29644 | Bipolar I disorder, most recent episode (or current) manic, severe, specified as with psychotic behavior      |
| DG14 | Psychiatric disorders | 29645 | Bipolar I disorder, most recent episode (or current) manic, in partial or unspecified remission               |
| DG14 | Psychiatric disorders | 29646 | Bipolar I disorder, most recent episode (or current) manic, in full remission                                 |
| DG14 | Psychiatric disorders | 2965  | Bipolar I disorder, most recent episode (or current) depressed                                                |
| DG14 | Psychiatric disorders | 29650 | Bipolar I disorder, most recent episode (or current) depressed, unspecified                                   |
| DG14 | Psychiatric disorders | 29651 | Bipolar I disorder, most recent episode (or current) depressed, mild                                          |
| DG14 | Psychiatric disorders | 29652 | Bipolar I disorder, most recent episode (or current) depressed, moderate                                      |
| DG14 | Psychiatric disorders | 29653 | Bipolar I disorder, most recent episode (or current) depressed, severe, without mention of psychotic behavior |
| DG14 | Psychiatric disorders | 29654 | Bipolar I disorder, most recent episode (or current) depressed, severe, specified as with psychotic behavior  |
| DG14 | Psychiatric disorders | 29655 | Bipolar I disorder, most recent episode (or current) depressed, in partial or unspecified remission           |
| DG14 | Psychiatric disorders | 29656 | Bipolar I disorder, most recent episode (or current) depressed, in full remission                             |
| DG14 | Psychiatric disorders | 2966  | Bipolar I disorder, most recent episode (or current) mixed                                                    |
| DG14 | Psychiatric disorders | 29660 | Bipolar I disorder, most recent episode (or current) mixed, unspecified                                       |
| DG14 | Psychiatric disorders | 29661 | Bipolar I disorder, most recent episode (or current) mixed, mild                                              |
| DG14 | Psychiatric disorders | 29662 | Bipolar I disorder, most recent episode (or current) mixed, moderate                                          |
| DG14 | Psychiatric disorders | 29663 | Bipolar I disorder, most recent episode (or current) mixed, severe, without mention of psychotic behavior     |
| DG14 | Psychiatric disorders | 29664 | Bipolar I disorder, most recent episode (or current) mixed, severe, specified as with psychotic behavior      |
| DG14 | Psychiatric disorders | 29665 | Bipolar I disorder, most recent episode (or current) mixed, in partial or unspecified remission               |

|      |                       |       |                                                                               |
|------|-----------------------|-------|-------------------------------------------------------------------------------|
| DG14 | Psychiatric disorders | 29666 | Bipolar I disorder, most recent episode (or current) mixed, in full remission |
| DG14 | Psychiatric disorders | 2967  | Bipolar I disorder, most recent episode (or current) unspecified              |
| DG14 | Psychiatric disorders | 2968  | Other and unspecified bipolar disorders                                       |
| DG14 | Psychiatric disorders | 29680 | Bipolar disorder, unspecified                                                 |
| DG14 | Psychiatric disorders | 29681 | Atypical manic disorder                                                       |
| DG14 | Psychiatric disorders | 29682 | Atypical depressive disorder                                                  |
| DG14 | Psychiatric disorders | 29689 | Other bipolar disorders                                                       |
| DG14 | Psychiatric disorders | 2969  | Other and unspecified episodic mood disorder                                  |
| DG14 | Psychiatric disorders | 29690 | Unspecified episodic mood disorder                                            |
| DG14 | Psychiatric disorders | 29699 | Other specified episodic mood disorder                                        |
| DG14 | Psychiatric disorders | 2980  | Depressive type psychosis                                                     |
| DG14 | Psychiatric disorders | 2981  | Excitative type psychosis                                                     |
| DG14 | Psychiatric disorders | 2984  | Psychogenic paranoid psychosis                                                |
| DG14 | Psychiatric disorders | 2988  | Other and unspecified reactive psychosis                                      |
| DG14 | Psychiatric disorders | 2989  | Unspecified psychosis                                                         |
| DG14 | Psychiatric disorders | 300   | Anxiety, dissociative and somatoform disorders                                |
| DG14 | Psychiatric disorders | 3000  | Anxiety states                                                                |
| DG14 | Psychiatric disorders | 30000 | Anxiety state, unspecified                                                    |
| DG14 | Psychiatric disorders | 30001 | Panic disorder without agoraphobia                                            |
| DG14 | Psychiatric disorders | 30002 | Generalized anxiety disorder                                                  |
| DG14 | Psychiatric disorders | 30009 | Other anxiety states                                                          |
| DG14 | Psychiatric disorders | 3001  | Dissociative, conversion and factitious disorders                             |
| DG14 | Psychiatric disorders | 30010 | Hysteria, unspecified                                                         |
| DG14 | Psychiatric disorders | 30011 | Conversion disorder                                                           |
| DG14 | Psychiatric disorders | 30012 | Dissociative amnesia                                                          |
| DG14 | Psychiatric disorders | 30013 | Dissociative fugue                                                            |
| DG14 | Psychiatric disorders | 30014 | Dissociative identity disorder                                                |
| DG14 | Psychiatric disorders | 30015 | Dissociative disorder or reaction, unspecified                                |
| DG14 | Psychiatric disorders | 30016 | Factitious disorder with predominantly psychological signs and symptoms       |
| DG14 | Psychiatric disorders | 30019 | Other and unspecified factitious illness                                      |
| DG14 | Psychiatric disorders | 3002  | Phobic disorders                                                              |
| DG14 | Psychiatric disorders | 30020 | Phobia, unspecified                                                           |
| DG14 | Psychiatric disorders | 30021 | Agoraphobia with panic disorder                                               |
| DG14 | Psychiatric disorders | 30022 | Agoraphobia without mention of panic attacks                                  |
| DG14 | Psychiatric disorders | 30023 | Social phobia                                                                 |
| DG14 | Psychiatric disorders | 30029 | Other isolated or specific phobias                                            |
| DG14 | Psychiatric disorders | 3003  | Obsessive-compulsive disorders                                                |
| DG14 | Psychiatric disorders | 3004  | Dysthymic disorder                                                            |
| DG14 | Psychiatric disorders | 3005  | Neurasthenia                                                                  |
| DG14 | Psychiatric disorders | 3006  | Depersonalization disorder                                                    |
| DG14 | Psychiatric disorders | 3007  | Hypochondriasis                                                               |
| DG14 | Psychiatric disorders | 3008  | Somatoform disorders                                                          |
| DG14 | Psychiatric disorders | 30081 | Somatization disorder                                                         |
| DG14 | Psychiatric disorders | 30082 | Undifferentiated somatoform disorder                                          |

|      |                       |       |                                                                 |
|------|-----------------------|-------|-----------------------------------------------------------------|
| DG14 | Psychiatric disorders | 30089 | Other somatoform disorders                                      |
| DG14 | Psychiatric disorders | 3009  | Unspecified nonpsychotic mental disorder                        |
| DG14 | Psychiatric disorders | 301   | Personality disorders                                           |
| DG14 | Psychiatric disorders | 3010  | Paranoid personality disorder                                   |
| DG14 | Psychiatric disorders | 3011  | Affective personality disorder                                  |
| DG14 | Psychiatric disorders | 30110 | Affective personality disorder, unspecified                     |
| DG14 | Psychiatric disorders | 30111 | Chronic hypomanic personality disorder                          |
| DG14 | Psychiatric disorders | 30112 | Chronic depressive personality disorder                         |
| DG14 | Psychiatric disorders | 30113 | Cyclothymic disorder                                            |
| DG14 | Psychiatric disorders | 3012  | Schizoid personality disorder                                   |
| DG14 | Psychiatric disorders | 30120 | Schizoid personality disorder, unspecified                      |
| DG14 | Psychiatric disorders | 30121 | Introverted personality                                         |
| DG14 | Psychiatric disorders | 30122 | Schizotypal personality disorder                                |
| DG14 | Psychiatric disorders | 3013  | Explosive personality disorder                                  |
| DG14 | Psychiatric disorders | 3014  | Obsessive-compulsive personality disorder                       |
| DG14 | Psychiatric disorders | 3015  | Histrionic personality disorder                                 |
| DG14 | Psychiatric disorders | 30150 | Histrionic personality disorder, unspecified                    |
| DG14 | Psychiatric disorders | 30151 | Chronic factitious illness with physical symptoms               |
| DG14 | Psychiatric disorders | 30159 | Other histrionic personality disorder                           |
| DG14 | Psychiatric disorders | 3016  | Dependent personality disorder                                  |
| DG14 | Psychiatric disorders | 3017  | Antisocial personality disorder                                 |
| DG14 | Psychiatric disorders | 3018  | Other personality disorders                                     |
| DG14 | Psychiatric disorders | 30181 | Narcissistic personality disorder                               |
| DG14 | Psychiatric disorders | 30182 | Avoidant personality disorder                                   |
| DG14 | Psychiatric disorders | 30183 | Borderline personality disorder                                 |
| DG14 | Psychiatric disorders | 30184 | Passive-aggressive personality                                  |
| DG14 | Psychiatric disorders | 30189 | Other personality disorders                                     |
| DG14 | Psychiatric disorders | 3019  | Unspecified personality disorder                                |
| DG14 | Psychiatric disorders | 306   | Physiological malfunction arising from mental factors           |
| DG14 | Psychiatric disorders | 3060  | Musculoskeletal malfunction arising from mental factors         |
| DG14 | Psychiatric disorders | 3061  | Respiratory malfunction arising from mental factors             |
| DG14 | Psychiatric disorders | 3062  | Cardiovascular malfunction arising from mental factors          |
| DG14 | Psychiatric disorders | 3063  | Skin disorder arising from mental factors                       |
| DG14 | Psychiatric disorders | 3064  | Gastrointestinal malfunction arising from mental factors        |
| DG14 | Psychiatric disorders | 3065  | Genitourinary                                                   |
| DG14 | Psychiatric disorders | 30650 | Psychogenic genitourinary malfunction, unspecified              |
| DG14 | Psychiatric disorders | 30651 | Psychogenic vaginismus                                          |
| DG14 | Psychiatric disorders | 30652 | Psychogenic dysmenorrhea                                        |
| DG14 | Psychiatric disorders | 30653 | Psychogenic dysuria                                             |
| DG14 | Psychiatric disorders | 30659 | Other genitourinary malfunction arising from mental factors     |
| DG14 | Psychiatric disorders | 3066  | Endocrine disorder arising from mental factors                  |
| DG14 | Psychiatric disorders | 3067  | Disorder of organs of special sense arising from mental factors |
| DG14 | Psychiatric disorders | 3068  | Other specified psychophysiological malfunction                 |
| DG14 | Psychiatric disorders | 3069  | Unspecified psychophysiological malfunction                     |
| DG14 | Psychiatric disorders | 308   | Acute reaction to stress                                        |

|      |                       |       |                                                                              |
|------|-----------------------|-------|------------------------------------------------------------------------------|
| DG14 | Psychiatric disorders | 3080  | Predominant disturbance of emotions                                          |
| DG14 | Psychiatric disorders | 3081  | Predominant disturbance of consciousness                                     |
| DG14 | Psychiatric disorders | 3082  | Predominant psychomotor disturbance                                          |
| DG14 | Psychiatric disorders | 3083  | Other acute reactions to stress                                              |
| DG14 | Psychiatric disorders | 3084  | Mixed disorders as reaction to stress                                        |
| DG14 | Psychiatric disorders | 3089  | Unspecified acute reaction to stress                                         |
| DG14 | Psychiatric disorders | 309   | Adjustment reaction                                                          |
| DG14 | Psychiatric disorders | 3090  | Adjustment disorder with depressed mood                                      |
| DG14 | Psychiatric disorders | 3091  | Prolonged depressive reaction                                                |
| DG14 | Psychiatric disorders | 3092  | With predominant disturbance of other emotions                               |
| DG14 | Psychiatric disorders | 30921 | Separation anxiety disorder                                                  |
| DG14 | Psychiatric disorders | 30922 | Emancipation disorder of adolescence and early adult life                    |
| DG14 | Psychiatric disorders | 30923 | Specific academic or work inhibition                                         |
| DG14 | Psychiatric disorders | 30924 | Adjustment disorder with anxiety                                             |
| DG14 | Psychiatric disorders | 30928 | Adjustment disorder with mixed anxiety and depressed mood                    |
| DG14 | Psychiatric disorders | 30929 | Other adjustment reactions with predominant disturbance of other emotions    |
| DG14 | Psychiatric disorders | 3093  | Adjustment disorder with disturbance of conduct                              |
| DG14 | Psychiatric disorders | 3094  | Adjustment disorder with mixed disturbance of emotions and conduct           |
| DG14 | Psychiatric disorders | 3098  | Other specified adjustment reactions                                         |
| DG14 | Psychiatric disorders | 30981 | Posttraumatic stress disorder                                                |
| DG14 | Psychiatric disorders | 30982 | Adjustment reaction with physical symptoms                                   |
| DG14 | Psychiatric disorders | 30983 | Adjustment reaction with withdrawal                                          |
| DG14 | Psychiatric disorders | 30989 | Other specified adjustment reactions                                         |
| DG14 | Psychiatric disorders | 3099  | Unspecified adjustment reaction                                              |
| DG14 | Psychiatric disorders | 310   | Specific nonpsychotic mental disorders due to brain damage                   |
| DG14 | Psychiatric disorders | 3100  | Frontal lobe syndrome                                                        |
| DG14 | Psychiatric disorders | 3101  | Personality change due to conditions classified elsewhere                    |
| DG14 | Psychiatric disorders | 3102  | Postconcussion syndrome                                                      |
| DG14 | Psychiatric disorders | 3108  | Other specified nonpsychotic mental disorders following organic brain damage |
| DG14 | Psychiatric disorders | 31081 | Pseudobulbar affect                                                          |
| DG14 | Psychiatric disorders | 31089 | Other specified nonpsychotic mental disorders following organic brain damage |
| DG14 | Psychiatric disorders | 3109  | Unspecified nonpsychotic mental disorder following organic brain damage      |
| DG14 | Psychiatric disorders | 311   | Depressive disorder, not elsewhere classified                                |
| DG14 | Psychiatric disorders | 312   | Disturbance of conduct, not elsewhere classified                             |
| DG14 | Psychiatric disorders | 3120  | Undersocialized conduct disorder, aggressive type                            |
| DG14 | Psychiatric disorders | 31200 | Undersocialized conduct disorder, aggressive type, unspecified               |
| DG14 | Psychiatric disorders | 31201 | Undersocialized conduct disorder, aggressive type, mild                      |
| DG14 | Psychiatric disorders | 31202 | Undersocialized conduct disorder, aggressive type, moderate                  |
| DG14 | Psychiatric disorders | 31203 | Undersocialized conduct disorder, aggressive type, severe                    |
| DG14 | Psychiatric disorders | 3121  | Undersocialized conduct disorder, unaggressive type                          |

|      |                       |       |                                                                       |
|------|-----------------------|-------|-----------------------------------------------------------------------|
| DG14 | Psychiatric disorders | 31210 | Undersocialized conduct disorder, unaggressive type, unspecified      |
| DG14 | Psychiatric disorders | 31211 | Undersocialized conduct disorder, unaggressive type, mild             |
| DG14 | Psychiatric disorders | 31212 | Undersocialized conduct disorder, unaggressive type, moderate         |
| DG14 | Psychiatric disorders | 31213 | Undersocialized conduct disorder, unaggressive type, severe           |
| DG14 | Psychiatric disorders | 3122  | Socialized conduct disorder                                           |
| DG14 | Psychiatric disorders | 31220 | Socialized conduct disorder, unspecified                              |
| DG14 | Psychiatric disorders | 31221 | Socialized conduct disorder, mild                                     |
| DG14 | Psychiatric disorders | 31222 | Socialized conduct disorder, moderate                                 |
| DG14 | Psychiatric disorders | 31223 | Socialized conduct disorder, severe                                   |
| DG14 | Psychiatric disorders | 3123  | Disorders of impulse control, not elsewhere classified                |
| DG14 | Psychiatric disorders | 31230 | Impulse control disorder, unspecified                                 |
| DG14 | Psychiatric disorders | 31231 | Pathological gambling                                                 |
| DG14 | Psychiatric disorders | 31232 | Kleptomania                                                           |
| DG14 | Psychiatric disorders | 31233 | Pyromania                                                             |
| DG14 | Psychiatric disorders | 31234 | Intermittent explosive disorder                                       |
| DG14 | Psychiatric disorders | 31235 | Isolated explosive disorder                                           |
| DG14 | Psychiatric disorders | 31239 | Other disorders of impulse control                                    |
| DG14 | Psychiatric disorders | 3124  | Mixed disturbance of conduct and emotions                             |
| DG14 | Psychiatric disorders | 3128  | Other specified disturbances of conduct, not elsewhere classified     |
| DG14 | Psychiatric disorders | 31281 | Conduct disorder, childhood onset type                                |
| DG14 | Psychiatric disorders | 31282 | Conduct disorder, adolescent onset type                               |
| DG14 | Psychiatric disorders | 31289 | Other conduct disorder                                                |
| DG14 | Psychiatric disorders | 3129  | Unspecified disturbance of conduct                                    |
| DG14 | Psychiatric disorders | 313   | Disturbance of emotions specific to childhood and adolescence         |
| DG14 | Psychiatric disorders | 3130  | Overanxious disorder specific to childhood and adolescence            |
| DG14 | Psychiatric disorders | 3131  | Misery and unhappiness disorder specific to childhood and adolescence |
| DG14 | Psychiatric disorders | 3132  | Sensitivity, shyness, and social withdrawal disorder                  |
| DG14 | Psychiatric disorders | 31321 | Shyness disorder of childhood                                         |
| DG14 | Psychiatric disorders | 31322 | Introverted disorder of childhood                                     |
| DG14 | Psychiatric disorders | 31323 | Selective mutism                                                      |
| DG14 | Psychiatric disorders | 3133  | Relationship problems specific to childhood and adolescence           |
| DG14 | Psychiatric disorders | 3138  | Other or mixed emotional disturbances of childhood or adolescence     |
| DG14 | Psychiatric disorders | 31381 | Oppositional defiant disorder                                         |
| DG14 | Psychiatric disorders | 31382 | Identity disorder of childhood or adolescence                         |
| DG14 | Psychiatric disorders | 31383 | Academic underachievement disorder of childhood or adolescence        |
| DG14 | Psychiatric disorders | 31389 | Other emotional disturbances of childhood or adolescence              |
| DG14 | Psychiatric disorders | 3139  | Unspecified emotional disturbance of childhood or adolescence         |
| DG14 | Psychiatric disorders | 316   | Psychic factors associated with diseases classified elsewhere         |
| DG15 | Dependence            | 2910  | Alcohol withdrawal delirium                                           |

|      |            |       |                                                           |
|------|------------|-------|-----------------------------------------------------------|
| DG15 | Dependence | 2911  | Alcohol-induced persisting amnestic disorder              |
| DG15 | Dependence | 2912  | Alcohol-induced persisting dementia                       |
| DG15 | Dependence | 2913  | Alcohol-induced psychotic disorder with hallucinations    |
| DG15 | Dependence | 2915  | Alcohol-induced psychotic disorder with delusions         |
| DG15 | Dependence | 2918  | Other specified alcohol-induced mental disorders          |
| DG15 | Dependence | 29181 | Alcohol withdrawal                                        |
| DG15 | Dependence | 29182 | Alcohol induced sleep disorders                           |
| DG15 | Dependence | 29189 | Other alcohol-induced mental disorders                    |
| DG15 | Dependence | 2919  | Unspecified alcohol-induced mental disorders              |
| DG15 | Dependence | 2920  | Drug withdrawal                                           |
| DG15 | Dependence | 29282 | Drug-induced persisting dementia                          |
| DG15 | Dependence | 29283 | Drug-induced persisting amnestic disorder                 |
| DG15 | Dependence | 29284 | Drug-induced mood disorder                                |
| DG15 | Dependence | 29285 | Drug induced sleep disorders                              |
| DG15 | Dependence | 29289 | Other specified drug-induced mental disorders             |
| DG15 | Dependence | 2929  | Unspecified drug-induced mental disorder                  |
| DG15 | Dependence | 303   | Alcohol dependence syndrome                               |
| DG15 | Dependence | 3030  | Acute alcoholic intoxication                              |
| DG15 | Dependence | 30300 | Acute alcoholic intoxication in alcoholism, unspecified   |
| DG15 | Dependence | 30301 | Acute alcoholic intoxication in alcoholism, continuous    |
| DG15 | Dependence | 30302 | Acute alcoholic intoxication in alcoholism, episodic      |
| DG15 | Dependence | 30303 | Acute alcoholic intoxication in alcoholism, in remission  |
| DG15 | Dependence | 3039  | Other and unspecified alcohol dependence                  |
| DG15 | Dependence | 30390 | Other and unspecified alcohol dependence, unspecified     |
| DG15 | Dependence | 30391 | Other and unspecified alcohol dependence, continuous      |
| DG15 | Dependence | 30392 | Other and unspecified alcohol dependence, episodic        |
| DG15 | Dependence | 30393 | Other and unspecified alcohol dependence, in remission    |
| DG15 | Dependence | 304   | Drug dependence                                           |
| DG15 | Dependence | 3040  | Opioid type dependence                                    |
| DG15 | Dependence | 30400 | Opioid type dependence, unspecified                       |
| DG15 | Dependence | 30401 | Opioid type dependence, continuous                        |
| DG15 | Dependence | 30402 | Opioid type dependence, episodic                          |
| DG15 | Dependence | 30403 | Opioid type dependence, in remission                      |
| DG15 | Dependence | 3041  | Sedative, hypnotic or anxiolytic dependence               |
| DG15 | Dependence | 30410 | Sedative, hypnotic or anxiolytic dependence, unspecified  |
| DG15 | Dependence | 30411 | Sedative, hypnotic or anxiolytic dependence, continuous   |
| DG15 | Dependence | 30412 | Sedative, hypnotic or anxiolytic dependence, episodic     |
| DG15 | Dependence | 30413 | Sedative, hypnotic or anxiolytic dependence, in remission |
| DG15 | Dependence | 3042  | Cocaine dependence                                        |
| DG15 | Dependence | 30420 | Cocaine dependence, unspecified                           |
| DG15 | Dependence | 30421 | Cocaine dependence, continuous                            |
| DG15 | Dependence | 30422 | Cocaine dependence, episodic                              |
| DG15 | Dependence | 30423 | Cocaine dependence, in remission                          |
| DG15 | Dependence | 3043  | Cannabis dependence                                       |
| DG15 | Dependence | 30430 | Cannabis dependence, unspecified                          |
| DG15 | Dependence | 30431 | Cannabis dependence, continuous                           |

|      |            |       |                                                                               |
|------|------------|-------|-------------------------------------------------------------------------------|
| DG15 | Dependence | 30432 | Cannabis dependence, episodic                                                 |
| DG15 | Dependence | 30433 | Cannabis dependence, in remission                                             |
| DG15 | Dependence | 3044  | Amphetamine and other psychostimulant dependence                              |
| DG15 | Dependence | 30440 | Amphetamine and other psychostimulant dependence, unspecified                 |
| DG15 | Dependence | 30441 | Amphetamine and other psychostimulant dependence, continuous                  |
| DG15 | Dependence | 30442 | Amphetamine and other psychostimulant dependence, episodic                    |
| DG15 | Dependence | 30443 | Amphetamine and other psychostimulant dependence, in remission                |
| DG15 | Dependence | 3045  | Hallucinogen dependence                                                       |
| DG15 | Dependence | 30450 | Hallucinogen dependence, unspecified                                          |
| DG15 | Dependence | 30451 | Hallucinogen dependence, continuous                                           |
| DG15 | Dependence | 30452 | Hallucinogen dependence, episodic                                             |
| DG15 | Dependence | 30453 | Hallucinogen dependence, in remission                                         |
| DG15 | Dependence | 3046  | Other specified drug dependence                                               |
| DG15 | Dependence | 30460 | Other specified drug dependence, unspecified                                  |
| DG15 | Dependence | 30461 | Other specified drug dependence, continuous                                   |
| DG15 | Dependence | 30462 | Other specified drug dependence, episodic                                     |
| DG15 | Dependence | 30463 | Other specified drug dependence, in remission                                 |
| DG15 | Dependence | 3047  | Combinations of opioid type drug with any other                               |
| DG15 | Dependence | 30470 | Combinations of opioid type drug with any other drug dependence, unspecified  |
| DG15 | Dependence | 30471 | Combinations of opioid type drug with any other drug dependence, continuous   |
| DG15 | Dependence | 30472 | Combinations of opioid type drug with any other drug dependence, episodic     |
| DG15 | Dependence | 30473 | Combinations of opioid type drug with any other drug dependence, in remission |
| DG15 | Dependence | 3048  | Combinations of drug dependence excluding opioid type drug                    |
| DG15 | Dependence | 30480 | Combinations of drug dependence excluding opioid type drug, unspecified       |
| DG15 | Dependence | 30481 | Combinations of drug dependence excluding opioid type drug, continuous        |
| DG15 | Dependence | 30482 | Combinations of drug dependence excluding opioid type drug, episodic          |
| DG15 | Dependence | 30483 | Combinations of drug dependence excluding opioid type drug, in remission      |
| DG15 | Dependence | 3049  | Unspecified drug dependence                                                   |
| DG15 | Dependence | 30490 | Unspecified drug dependence, unspecified                                      |
| DG15 | Dependence | 30491 | Unspecified drug dependence, continuous                                       |
| DG15 | Dependence | 30492 | Unspecified drug dependence, episodic                                         |
| DG15 | Dependence | 30493 | Unspecified drug dependence, in remission                                     |
| DG15 | Dependence | 305   | Nondependent abuse of drugs                                                   |
| DG15 | Dependence | 3050  | Alcohol abuse                                                                 |
| DG15 | Dependence | 30500 | Alcohol abuse, unspecified                                                    |

|      |            |       |                                                                   |
|------|------------|-------|-------------------------------------------------------------------|
| DG15 | Dependence | 30501 | Alcohol abuse, continuous                                         |
| DG15 | Dependence | 30502 | Alcohol abuse, episodic                                           |
| DG15 | Dependence | 30503 | Alcohol abuse, in remission                                       |
| DG15 | Dependence | 3051  | Tobacco use disorder                                              |
| DG15 | Dependence | 3052  | Cannabis abuse                                                    |
| DG15 | Dependence | 30520 | Cannabis abuse, unspecified                                       |
| DG15 | Dependence | 30521 | Cannabis abuse, continuous                                        |
| DG15 | Dependence | 30522 | Cannabis abuse, episodic                                          |
| DG15 | Dependence | 30523 | Cannabis abuse, in remission                                      |
| DG15 | Dependence | 3053  | Hallucinogen abuse                                                |
| DG15 | Dependence | 30530 | Hallucinogen abuse, unspecified                                   |
| DG15 | Dependence | 30531 | Hallucinogen abuse, continuous                                    |
| DG15 | Dependence | 30532 | Hallucinogen abuse, episodic                                      |
| DG15 | Dependence | 30533 | Hallucinogen abuse, in remission                                  |
| DG15 | Dependence | 3054  | Sedative, hypnotic or anxiolytic abuse                            |
| DG15 | Dependence | 30540 | Sedative, hypnotic or anxiolytic abuse, unspecified               |
| DG15 | Dependence | 30541 | Sedative, hypnotic or anxiolytic abuse, continuous                |
| DG15 | Dependence | 30542 | Sedative, hypnotic or anxiolytic abuse, episodic                  |
| DG15 | Dependence | 30543 | Sedative, hypnotic or anxiolytic abuse, in remission              |
| DG15 | Dependence | 3055  | Opioid abuse                                                      |
| DG15 | Dependence | 30550 | Opioid abuse, unspecified                                         |
| DG15 | Dependence | 30551 | Opioid abuse, continuous                                          |
| DG15 | Dependence | 30552 | Opioid abuse, episodic                                            |
| DG15 | Dependence | 30553 | Opioid abuse, in remission                                        |
| DG15 | Dependence | 3056  | Cocaine abuse                                                     |
| DG15 | Dependence | 30560 | Cocaine abuse, unspecified                                        |
| DG15 | Dependence | 30561 | Cocaine abuse, continuous                                         |
| DG15 | Dependence | 30562 | Cocaine abuse, episodic                                           |
| DG15 | Dependence | 30563 | Cocaine abuse, in remission                                       |
| DG15 | Dependence | 3057  | Amphetamine or related acting sympathomimetic abuse               |
| DG15 | Dependence | 30570 | Amphetamine or related acting sympathomimetic abuse, unspecified  |
| DG15 | Dependence | 30571 | Amphetamine or related acting sympathomimetic abuse, continuous   |
| DG15 | Dependence | 30572 | Amphetamine or related acting sympathomimetic abuse, episodic     |
| DG15 | Dependence | 30573 | Amphetamine or related acting sympathomimetic abuse, in remission |
| DG15 | Dependence | 3058  | Antidepressant type abuse                                         |
| DG15 | Dependence | 30580 | Antidepressant type abuse, unspecified                            |
| DG15 | Dependence | 30581 | Antidepressant type abuse, continuous                             |
| DG15 | Dependence | 30582 | Antidepressant type abuse, episodic                               |
| DG15 | Dependence | 30583 | Antidepressant type abuse, in remission                           |
| DG15 | Dependence | 3059  | Other, mixed, or unspecified drug abuse                           |
| DG15 | Dependence | 30590 | Other, mixed, or unspecified drug abuse, unspecified              |
| DG15 | Dependence | 30591 | Other, mixed, or unspecified drug abuse, continuous               |
| DG15 | Dependence | 30592 | Other, mixed, or unspecified drug abuse, episodic                 |



|      |                          |       |                                                                               |
|------|--------------------------|-------|-------------------------------------------------------------------------------|
| DG15 | Dependence               | 30593 | Other, mixed, or unspecified drug abuse, in remission                         |
| DG16 | Sleep disorders          | 347   | Cataplexy and narcolepsy                                                      |
| DG16 | Sleep disorders          | 3470  | Narcolepsy                                                                    |
| DG16 | Sleep disorders          | 34700 | Narcolepsy, without cataplexy                                                 |
| DG16 | Sleep disorders          | 34701 | Narcolepsy, with cataplexy                                                    |
| DG16 | Sleep disorders          | 3471  | Narcolepsy in conditions classified elsewhere                                 |
| DG16 | Sleep disorders          | 34710 | Narcolepsy in conditions classified elsewhere, without cataplexy              |
| DG16 | Sleep disorders          | 34711 | Narcolepsy in conditions classified elsewhere, with cataplexy                 |
| DG17 | Central nervous diseases | 3330  | Other degenerative diseases of the basal ganglia                              |
| DG17 | Central nervous diseases | 3331  | Essential and other specified forms of tremor                                 |
| DG17 | Central nervous diseases | 3332  | Myoclonus                                                                     |
| DG17 | Central nervous diseases | 3333  | Tics of organic origin                                                        |
| DG17 | Central nervous diseases | 3334  | Huntington's chorea                                                           |
| DG17 | Central nervous diseases | 3335  | Other choreas                                                                 |
| DG17 | Central nervous diseases | 3336  | Genetic torsion dystonia                                                      |
| DG17 | Central nervous diseases | 3337  | Acquired torsion dystonia                                                     |
| DG17 | Central nervous diseases | 33371 | Athetoid cerebral palsy                                                       |
| DG17 | Central nervous diseases | 33379 | Other acquired torsion dystonia                                               |
| DG17 | Central nervous diseases | 33381 | Blepharospasm                                                                 |
| DG17 | Central nervous diseases | 33382 | Orofacial dyskinesia                                                          |
| DG17 | Central nervous diseases | 33383 | Spasmodic torticollis                                                         |
| DG17 | Central nervous diseases | 33384 | Organic writers' cramp                                                        |
| DG17 | Central nervous diseases | 33389 | Other fragments of torsion dystonia                                           |
| DG17 | Central nervous diseases | 3339  | Other and unspecified extrapyramidal diseases and abnormal movement disorders |
| DG17 | Central nervous diseases | 33390 | Unspecified extrapyramidal disease and abnormal movement disorder             |
| DG17 | Central nervous diseases | 33391 | Stiff-man syndrome                                                            |
| DG17 | Central nervous diseases | 33392 | Neuroleptic malignant syndrome                                                |
| DG17 | Central nervous diseases | 33393 | Benign shuddering attacks                                                     |

|      |                          |       |                                                                             |
|------|--------------------------|-------|-----------------------------------------------------------------------------|
| DG17 | Central nervous diseases | 33394 | Restless legs syndrome (RLS)                                                |
| DG17 | Central nervous diseases | 33399 | Other extrapyramidal diseases and abnormal movement disorders               |
| DG17 | Central nervous diseases | 334   | Spinocerebellar disease                                                     |
| DG17 | Central nervous diseases | 3340  | Friedreich's ataxia                                                         |
| DG17 | Central nervous diseases | 3341  | Hereditary spastic paraplegia                                               |
| DG17 | Central nervous diseases | 3342  | Primary cerebellar degeneration                                             |
| DG17 | Central nervous diseases | 3343  | Other cerebellar ataxia                                                     |
| DG17 | Central nervous diseases | 3344  | Cerebellar ataxia in diseases classified elsewhere                          |
| DG17 | Central nervous diseases | 3348  | Other spinocerebellar diseases                                              |
| DG17 | Central nervous diseases | 3349  | Spinocerebellar disease, unspecified                                        |
| DG17 | Central nervous diseases | 33900 | Cluster headache syndrome, unspecified                                      |
| DG17 | Central nervous diseases | 33901 | Episodic cluster headache                                                   |
| DG17 | Central nervous diseases | 33902 | Chronic cluster headache                                                    |
| DG17 | Central nervous diseases | 33903 | Episodic paroxysmal hemicrania                                              |
| DG17 | Central nervous diseases | 33904 | Chronic paroxysmal hemicrania                                               |
| DG17 | Central nervous diseases | 33911 | Episodic tension type headache                                              |
| DG17 | Central nervous diseases | 33912 | Chronic tension type headache                                               |
| DG17 | Central nervous diseases | 33922 | Chronic post-traumatic headache                                             |
| DG17 | Central nervous diseases | 33941 | Hemicrania continua                                                         |
| DG17 | Central nervous diseases | 33942 | New daily persistent headache                                               |
| DG17 | Central nervous diseases | 345   | Epilepsy and recurrent seizures                                             |
| DG17 | Central nervous diseases | 3450  | Generalized nonconvulsive epilepsy                                          |
| DG17 | Central nervous diseases | 34500 | Generalized nonconvulsive epilepsy, without mention of intractable epilepsy |
| DG17 | Central nervous diseases | 34501 | Generalized nonconvulsive epilepsy, with intractable epilepsy               |
| DG17 | Central nervous diseases | 3451  | Generalized convulsive epilepsy                                             |

|      |                          |       |                                                                                                                                                |
|------|--------------------------|-------|------------------------------------------------------------------------------------------------------------------------------------------------|
| DG17 | Central nervous diseases | 34510 | Generalized convulsive epilepsy, without mention of intractable epilepsy                                                                       |
| DG17 | Central nervous diseases | 34511 | Generalized convulsive epilepsy, with intractable epilepsy                                                                                     |
| DG17 | Central nervous diseases | 3452  | Petit mal status                                                                                                                               |
| DG17 | Central nervous diseases | 3453  | Grand mal status                                                                                                                               |
| DG17 | Central nervous diseases | 3454  | Localization-related (focal) (partial) epilepsy and epileptic syndromes with complex partial seizures                                          |
| DG17 | Central nervous diseases | 34540 | Localization-related (focal) (partial) epilepsy and epileptic syndromes with complex partial seizures, without mention of intractable epilepsy |
| DG17 | Central nervous diseases | 34541 | Localization-related (focal) (partial) epilepsy and epileptic syndromes with complex partial seizures, with intractable epilepsy               |
| DG17 | Central nervous diseases | 3455  | Localization-related (focal) (partial) epilepsy and epileptic syndromes with simple partial seizures                                           |
| DG17 | Central nervous diseases | 34550 | Localization-related (focal) (partial) epilepsy and epileptic syndromes with simple partial seizures, without mention of intractable epilepsy  |
| DG17 | Central nervous diseases | 34551 | Localization-related (focal) (partial) epilepsy and epileptic syndromes with simple partial seizures, with intractable epilepsy                |
| DG17 | Central nervous diseases | 3456  | Infantile spasms                                                                                                                               |
| DG17 | Central nervous diseases | 34560 | Infantile spasms, without mention of intractable epilepsy                                                                                      |
| DG17 | Central nervous diseases | 34561 | Infantile spasms, with intractable epilepsy                                                                                                    |
| DG17 | Central nervous diseases | 3457  | Epilepsia partialis continua                                                                                                                   |
| DG17 | Central nervous diseases | 34570 | Epilepsia partialis continua, without mention of intractable epilepsy                                                                          |
| DG17 | Central nervous diseases | 34571 | Epilepsia partialis continua, with intractable epilepsy                                                                                        |
| DG17 | Central nervous diseases | 3458  | Other forms of epilepsy and recurrent seizures                                                                                                 |
| DG17 | Central nervous diseases | 34580 | Other forms of epilepsy and recurrent seizures, without mention of intractable epilepsy                                                        |
| DG17 | Central nervous diseases | 34581 | Other forms of epilepsy and recurrent seizures, with intractable epilepsy                                                                      |
| DG17 | Central nervous diseases | 3459  | Epilepsy, unspecified                                                                                                                          |
| DG17 | Central nervous diseases | 34590 | Epilepsy, unspecified, without mention of intractable epilepsy                                                                                 |
| DG17 | Central nervous diseases | 34591 | Epilepsy, unspecified, with intractable epilepsy                                                                                               |
| DG17 | Central nervous diseases | 3480  | Cerebral cysts                                                                                                                                 |

|      |                          |       |                                                    |
|------|--------------------------|-------|----------------------------------------------------|
| DG17 | Central nervous diseases | 3481  | Anoxic brain damage                                |
| DG17 | Central nervous diseases | 3482  | Benign intracranial hypertension                   |
| DG17 | Central nervous diseases | 3483  | Encephalopathy, not elsewhere classified           |
| DG17 | Central nervous diseases | 34830 | Encephalopathy, unspecified                        |
| DG17 | Central nervous diseases | 34831 | Metabolic encephalopathy                           |
| DG17 | Central nervous diseases | 34839 | Other encephalopathy                               |
| DG17 | Central nervous diseases | 3484  | Compression of brain                               |
| DG17 | Central nervous diseases | 3485  | Cerebral edema                                     |
| DG17 | Central nervous diseases | 3488  | Other conditions of brain                          |
| DG17 | Central nervous diseases | 34881 | Temporal sclerosis                                 |
| DG17 | Central nervous diseases | 34882 | Brain death                                        |
| DG17 | Central nervous diseases | 34889 | Other conditions of brain                          |
| DG17 | Central nervous diseases | 3489  | Unspecified condition of brain                     |
| DG17 | Central nervous diseases | 353   | Nerve root and plexus disorders                    |
| DG17 | Central nervous diseases | 3530  | Brachial plexus lesions                            |
| DG17 | Central nervous diseases | 3531  | Lumbosacral plexus lesions                         |
| DG17 | Central nervous diseases | 3532  | Cervical root lesions, not elsewhere classified    |
| DG17 | Central nervous diseases | 3533  | Thoracic root lesions, not elsewhere classified    |
| DG17 | Central nervous diseases | 3534  | Lumbosacral root lesions, not elsewhere classified |
| DG17 | Central nervous diseases | 3535  | Neuralgic amyotrophy                               |
| DG17 | Central nervous diseases | 3536  | Phantom limb (syndrome)                            |
| DG17 | Central nervous diseases | 3538  | Other nerve root and plexus disorders              |
| DG17 | Central nervous diseases | 3539  | Unspecified nerve root and plexus disorder         |
| DG17 | Central nervous diseases | 355   | Mononeuritis of lower limb                         |
| DG17 | Central nervous diseases | 3550  | Lesion of sciatic nerve                            |

|      |                          |       |                                                             |
|------|--------------------------|-------|-------------------------------------------------------------|
| DG17 | Central nervous diseases | 3551  | Meralgia paresthetica                                       |
| DG17 | Central nervous diseases | 3552  | Other lesion of femoral nerve                               |
| DG17 | Central nervous diseases | 3553  | Lesion of lateral popliteal nerve                           |
| DG17 | Central nervous diseases | 3554  | Lesion of medial popliteal nerve                            |
| DG17 | Central nervous diseases | 3555  | Tarsal tunnel syndrome                                      |
| DG17 | Central nervous diseases | 3556  | Lesion of plantar nerve                                     |
| DG17 | Central nervous diseases | 3557  | Other mononeuritis of lower limb                            |
| DG17 | Central nervous diseases | 35571 | Causalgia of lower limb                                     |
| DG17 | Central nervous diseases | 35579 | Other mononeuritis of lower limb                            |
| DG17 | Central nervous diseases | 3558  | Mononeuritis of lower limb, unspecified                     |
| DG17 | Central nervous diseases | 3559  | Mononeuritis of unspecified site                            |
| DG17 | Central nervous diseases | 356   | Hereditary and idiopathic peripheral neuropathy             |
| DG17 | Central nervous diseases | 3560  | Hereditary peripheral neuropathy                            |
| DG17 | Central nervous diseases | 3561  | Peroneal muscular atrophy                                   |
| DG17 | Central nervous diseases | 3562  | Hereditary sensory neuropathy                               |
| DG17 | Central nervous diseases | 3563  | Refsum's disease                                            |
| DG17 | Central nervous diseases | 3564  | Idiopathic progressive polyneuropathy                       |
| DG17 | Central nervous diseases | 3568  | Other specified idiopathic peripheral neuropathy            |
| DG17 | Central nervous diseases | 3569  | Unspecified hereditary and idiopathic peripheral neuropathy |
| DG17 | Central nervous diseases | 3590  | Congenital hereditary muscular dystrophy                    |
| DG17 | Central nervous diseases | 3591  | Hereditary progressive muscular dystrophy                   |
| DG17 | Central nervous diseases | 3592  | Myotonic disorders                                          |
| DG17 | Central nervous diseases | 35921 | Myotonic muscular dystrophy                                 |
| DG17 | Central nervous diseases | 35922 | Myotonia congenita                                          |
| DG17 | Central nervous diseases | 35923 | Myotonic chondrodystrophy                                   |

|      |                          |       |                                                                    |
|------|--------------------------|-------|--------------------------------------------------------------------|
| DG17 | Central nervous diseases | 35924 | Drug- induced myotonia                                             |
| DG17 | Central nervous diseases | 35929 | Other specified myotonic disorder                                  |
| DG17 | Central nervous diseases | 3593  | Periodic paralysis                                                 |
| DG17 | Central nervous diseases | 3595  | Myopathy in endocrine diseases classified elsewhere                |
| DG17 | Central nervous diseases | 3596  | Symptomatic inflammatory myopathy in diseases classified elsewhere |
| DG17 | Central nervous diseases | 3597  | Inflammatory and immune myopathies, NEC                            |
| DG17 | Central nervous diseases | 35971 | Inclusion body myositis                                            |
| DG17 | Central nervous diseases | 35979 | Other inflammatory and immune myopathies, NEC                      |
| DG17 | Central nervous diseases | 3598  | Other myopathies                                                   |
| DG17 | Central nervous diseases | 35981 | Critical illness myopathy                                          |
| DG17 | Central nervous diseases | 35989 | Other myopathies                                                   |
| DG17 | Central nervous diseases | 3599  | Myopathy, unspecified                                              |
| DG18 | Nutrition disorders      | 260   | Kwashiorkor                                                        |
| DG18 | Nutrition disorders      | 261   | Nutritional marasmus                                               |
| DG18 | Nutrition disorders      | 262   | Other severe protein-calorie malnutrition                          |
| DG18 | Nutrition disorders      | 263   | Other and unspecified protein-calorie malnutrition                 |
| DG18 | Nutrition disorders      | 2630  | Malnutrition of moderate degree                                    |
| DG18 | Nutrition disorders      | 2631  | Malnutrition of mild degree                                        |
| DG18 | Nutrition disorders      | 2632  | Arrested development following protein-calorie malnutrition        |
| DG18 | Nutrition disorders      | 2638  | Other protein-calorie malnutrition                                 |
| DG18 | Nutrition disorders      | 2639  | Unspecified protein-calorie malnutrition                           |
| DG18 | Nutrition disorders      | 2645  | Vitamin A deficiency with night blindness                          |
| DG18 | Nutrition disorders      | 268   | Vitamin D deficiency                                               |
| DG18 | Nutrition disorders      | 2680  | Rickets, active                                                    |
| DG18 | Nutrition disorders      | 2681  | Rickets, late effect                                               |
| DG18 | Nutrition disorders      | 2682  | Osteomalacia, unspecified                                          |
| DG18 | Nutrition disorders      | 2689  | Unspecified vitamin D deficiency                                   |
| DG18 | Nutrition disorders      | 270   | Disorders of amino-acid transport and metabolism                   |
| DG18 | Nutrition disorders      | 2700  | Disturbances of amino-acid transport                               |
| DG18 | Nutrition disorders      | 2701  | Phenylketonuria [PKU]                                              |
| DG18 | Nutrition disorders      | 2702  | Other disturbances of aromatic amino-acid metabolism               |
| DG18 | Nutrition disorders      | 2703  | Disturbances of branched-chain amino-acid metabolism               |
| DG18 | Nutrition disorders      | 2704  | Disturbances of sulphur-bearing amino-acid metabolism              |
| DG18 | Nutrition disorders      | 2705  | Disturbances of histidine metabolism                               |
| DG18 | Nutrition disorders      | 2706  | Disorders of urea cycle metabolism                                 |

|      |                     |       |                                                                                          |
|------|---------------------|-------|------------------------------------------------------------------------------------------|
| DG18 | Nutrition disorders | 2707  | Other disturbances of straight-chain amino-acid metabolism                               |
| DG18 | Nutrition disorders | 2708  | Other specified disorders of amino-acid metabolism                                       |
| DG18 | Nutrition disorders | 2709  | Unspecified disorder of amino-acid metabolism                                            |
| DG18 | Nutrition disorders | 271   | Disorders of carbohydrate transport and metabolism                                       |
| DG18 | Nutrition disorders | 2710  | Glycogenosis                                                                             |
| DG18 | Nutrition disorders | 2711  | Galactosemia                                                                             |
| DG18 | Nutrition disorders | 2712  | Hereditary fructose intolerance                                                          |
| DG18 | Nutrition disorders | 2713  | Intestinal disaccharidase deficiencies and disaccharide malabsorption                    |
| DG18 | Nutrition disorders | 2714  | Renal glycosuria                                                                         |
| DG18 | Nutrition disorders | 2718  | Other specified disorders of carbohydrate transport and metabolism                       |
| DG18 | Nutrition disorders | 2719  | Unspecified disorder of carbohydrate transport and metabolism                            |
| DG18 | Nutrition disorders | 273   | Disorders of plasma protein metabolism                                                   |
| DG18 | Nutrition disorders | 2730  | Polyclonal hypergammaglobulinemia                                                        |
| DG18 | Nutrition disorders | 2731  | Monoclonal paraproteinemia                                                               |
| DG18 | Nutrition disorders | 2732  | Other paraproteinemias                                                                   |
| DG18 | Nutrition disorders | 2733  | Macroglobulinemia                                                                        |
| DG18 | Nutrition disorders | 2734  | Alpha-1-antitrypsin deficiency                                                           |
| DG18 | Nutrition disorders | 2738  | Other disorders of plasma protein metabolism                                             |
| DG18 | Nutrition disorders | 2739  | Unspecified disorder of plasma protein metabolism                                        |
| DG19 | Endocrine diseases  | 242   | Thyrotoxicosis with or without goiter                                                    |
| DG19 | Endocrine diseases  | 2420  | Toxic diffuse goiter                                                                     |
| DG19 | Endocrine diseases  | 24200 | Toxic diffuse goiter without mention of thyrotoxic crisis or storm                       |
| DG19 | Endocrine diseases  | 24201 | Toxic diffuse goiter with mention of thyrotoxic crisis or storm                          |
| DG19 | Endocrine diseases  | 2421  | Toxic uninodular goiter                                                                  |
| DG19 | Endocrine diseases  | 24210 | Toxic uninodular goiter without mention of thyrotoxic crisis or storm                    |
| DG19 | Endocrine diseases  | 24211 | Toxic uninodular goiter with mention of thyrotoxic crisis or storm                       |
| DG19 | Endocrine diseases  | 2422  | Toxic multinodular goiter                                                                |
| DG19 | Endocrine diseases  | 24220 | Toxic multinodular goiter without mention of thyrotoxic crisis or storm                  |
| DG19 | Endocrine diseases  | 24221 | Toxic multinodular goiter with mention of thyrotoxic crisis or storm                     |
| DG19 | Endocrine diseases  | 2423  | Toxic nodular goiter, unspecified                                                        |
| DG19 | Endocrine diseases  | 24230 | Toxic nodular goiter, unspecified type, without mention of thyrotoxic crisis or storm    |
| DG19 | Endocrine diseases  | 24231 | Toxic nodular goiter, unspecified type, with mention of thyrotoxic crisis or storm       |
| DG19 | Endocrine diseases  | 2424  | Thyrotoxicosis from ectopic thyroid nodule                                               |
| DG19 | Endocrine diseases  | 24240 | Thyrotoxicosis from ectopic thyroid nodule without mention of thyrotoxic crisis or storm |
| DG19 | Endocrine diseases  | 24241 | Thyrotoxicosis from ectopic thyroid nodule with mention of thyrotoxic crisis or storm    |

|      |                    |       |                                                                                                            |
|------|--------------------|-------|------------------------------------------------------------------------------------------------------------|
| DG19 | Endocrine diseases | 2428  | Thyrotoxicosis of other specified origin                                                                   |
| DG19 | Endocrine diseases | 24280 | Thyrotoxicosis of other specified origin without mention of thyrotoxic crisis or storm                     |
| DG19 | Endocrine diseases | 24281 | Thyrotoxicosis of other specified origin with mention of thyrotoxic crisis or storm                        |
| DG19 | Endocrine diseases | 2429  | Thyrotoxicosis without mention of goiter or other cause                                                    |
| DG19 | Endocrine diseases | 24290 | Thyrotoxicosis without mention of goiter or other cause, and without mention of thyrotoxic crisis or storm |
| DG19 | Endocrine diseases | 24291 | Thyrotoxicosis without mention of goiter or other cause, with mention of thyrotoxic crisis or storm        |
| DG19 | Endocrine diseases | 253   | Disorders of the pituitary gland and its hypothalamic control                                              |
| DG19 | Endocrine diseases | 2530  | Acromegaly and gigantism                                                                                   |
| DG19 | Endocrine diseases | 2531  | Other and unspecified anterior pituitary hyperfunction                                                     |
| DG19 | Endocrine diseases | 2532  | Panhypopituitarism                                                                                         |
| DG19 | Endocrine diseases | 2533  | Pituitary dwarfism                                                                                         |
| DG19 | Endocrine diseases | 2534  | Other anterior pituitary disorders                                                                         |
| DG19 | Endocrine diseases | 2535  | Diabetes insipidus                                                                                         |
| DG19 | Endocrine diseases | 2536  | Other disorders of neurohypophysis                                                                         |
| DG19 | Endocrine diseases | 2537  | Iatrogenic pituitary disorders                                                                             |
| DG19 | Endocrine diseases | 2538  | Other disorders of the pituitary and other syndromes of diencephalohypophyseal origin                      |
| DG19 | Endocrine diseases | 2539  | Unspecified disorder of the pituitary gland and its hypothalamic control                                   |
| DG19 | Endocrine diseases | 255   | Disorders of adrenal glands                                                                                |
| DG19 | Endocrine diseases | 2550  | Cushing's syndrome                                                                                         |
| DG19 | Endocrine diseases | 2551  | Hyperaldosteronism                                                                                         |
| DG19 | Endocrine diseases | 25510 | Hyperaldosteronism, unspecified                                                                            |
| DG19 | Endocrine diseases | 25511 | Glucocorticoid-remediable aldosteronism                                                                    |
| DG19 | Endocrine diseases | 25512 | Conn's syndrome                                                                                            |
| DG19 | Endocrine diseases | 25513 | Bartter's syndrome                                                                                         |
| DG19 | Endocrine diseases | 25514 | Other secondary aldosteronism                                                                              |
| DG19 | Endocrine diseases | 2552  | Adrenogenital disorders                                                                                    |
| DG19 | Endocrine diseases | 2553  | Other corticoadrenal overactivity                                                                          |
| DG19 | Endocrine diseases | 2554  | Corticoadrenal insufficiency                                                                               |
| DG19 | Endocrine diseases | 25541 | Glucocorticoid deficiency                                                                                  |
| DG19 | Endocrine diseases | 25542 | Mineralocorticoid deficiency                                                                               |
| DG19 | Endocrine diseases | 2555  | Other adrenal hypofunction                                                                                 |
| DG19 | Endocrine diseases | 2556  | Medulloadrenal hyperfunction                                                                               |
| DG19 | Endocrine diseases | 2558  | Other specified disorders of adrenal glands                                                                |
| DG19 | Endocrine diseases | 2559  | Unspecified disorder of adrenal glands                                                                     |
| DG19 | Endocrine diseases | 258   | Polyglandular dysfunction and related disorders                                                            |
| DG19 | Endocrine diseases | 2580  | Polyglandular activity in multiple endocrine adenomatosis                                                  |
| DG19 | Endocrine diseases | 25801 | Multiple endocrine neoplasia [MEN] type I                                                                  |
| DG19 | Endocrine diseases | 25802 | Multiple endocrine neoplasia [MEN] type IIA                                                                |
| DG19 | Endocrine diseases | 25803 | Multiple endocrine neoplasia [MEN] type IIB                                                                |
| DG19 | Endocrine diseases | 2581  | Other combinations of endocrine dysfunction                                                                |
| DG19 | Endocrine diseases | 2588  | Other specified polyglandular dysfunction                                                                  |



|      |                    |       |                                                             |
|------|--------------------|-------|-------------------------------------------------------------|
| DG19 | Endocrine diseases | 2589  | Polyglandular dysfunction, unspecified                      |
| DG19 | Endocrine diseases | 275   | Disorders of mineral metabolism                             |
| DG19 | Endocrine diseases | 2750  | Disorders of iron metabolism                                |
| DG19 | Endocrine diseases | 27501 | Hereditary hemochromatosis                                  |
| DG19 | Endocrine diseases | 27502 | Hemochromatosis due to repeated red blood cell transfusions |
| DG19 | Endocrine diseases | 27503 | Other hemochromatosis                                       |
| DG19 | Endocrine diseases | 27509 | Other disorders of iron metabolism                          |
| DG19 | Endocrine diseases | 2751  | Disorders of copper metabolism                              |
| DG19 | Endocrine diseases | 2752  | Disorders of magnesium metabolism                           |
| DG19 | Endocrine diseases | 2753  | Disorders of phosphorus metabolism                          |
| DG19 | Endocrine diseases | 2754  | Disorders of calcium metabolism                             |
| DG19 | Endocrine diseases | 27540 | Unspecified disorder of calcium metabolism                  |
| DG19 | Endocrine diseases | 27541 | Hypocalcemia                                                |
| DG19 | Endocrine diseases | 27542 | Hypercalcemia                                               |
| DG19 | Endocrine diseases | 27549 | Other disorders of calcium metabolism                       |
| DG19 | Endocrine diseases | 2755  | Hungry bone syndrome                                        |
| DG19 | Endocrine diseases | 2758  | Other specified disorders of mineral metabolism             |
| DG19 | Endocrine diseases | 2759  | Unspecified disorder of mineral metabolism                  |
| DG20 | Skin alterations   | 6918  | Other atopic dermatitis and related conditions              |
| DG20 | Skin alterations   | 6953  | Rosacea                                                     |
| DG20 | Skin alterations   | 6954  | Lupus erythematosus                                         |
| DG20 | Skin alterations   | 696   | Psoriasis and similar disorders                             |
| DG20 | Skin alterations   | 6960  | Psoriatic arthropathy                                       |
| DG20 | Skin alterations   | 6961  | Other psoriasis                                             |
| DG20 | Skin alterations   | 6962  | Parapsoriasis                                               |
| DG20 | Skin alterations   | 6963  | Pityriasis rosea                                            |
| DG20 | Skin alterations   | 6964  | Pityriasis rubra pilaris                                    |
| DG20 | Skin alterations   | 6965  | Other and unspecified pityriasis                            |
| DG20 | Skin alterations   | 6968  | Other psoriasis and similar disorders                       |
| DG20 | Skin alterations   | 7050  | Anhidrosis                                                  |
| DG20 | Skin alterations   | 70582 | Fox-Fordyce disease                                         |
| DG20 | Skin alterations   | 707   | Chronic ulcer of skin                                       |
| DG20 | Skin alterations   | 7070  | Pressure ulcer                                              |
| DG20 | Skin alterations   | 70700 | Pressure ulcer, unspecified site                            |
| DG20 | Skin alterations   | 70701 | Pressure ulcer, elbow                                       |
| DG20 | Skin alterations   | 70702 | Pressure ulcer, upper back                                  |
| DG20 | Skin alterations   | 70703 | Pressure ulcer, lower back                                  |
| DG20 | Skin alterations   | 70704 | Pressure ulcer, hip                                         |
| DG20 | Skin alterations   | 70705 | Pressure ulcer, buttock                                     |
| DG20 | Skin alterations   | 70706 | Pressure ulcer, ankle                                       |
| DG20 | Skin alterations   | 70707 | Pressure ulcer, heel                                        |
| DG20 | Skin alterations   | 70709 | Pressure ulcer, other site                                  |
| DG20 | Skin alterations   | 7071  | Ulcer of lower limbs, except pressure ulcer                 |
| DG20 | Skin alterations   | 70710 | Ulcer of lower limb, unspecified                            |
| DG20 | Skin alterations   | 70711 | Ulcer of thigh                                              |

|      |                  |       |                                                                                                                        |
|------|------------------|-------|------------------------------------------------------------------------------------------------------------------------|
| DG20 | Skin alterations | 70712 | Ulcer of calf                                                                                                          |
| DG20 | Skin alterations | 70713 | Ulcer of ankle                                                                                                         |
| DG20 | Skin alterations | 70714 | Ulcer of heel and midfoot                                                                                              |
| DG20 | Skin alterations | 70715 | Ulcer of other part of foot                                                                                            |
| DG20 | Skin alterations | 70719 | Ulcer of other part of lower limb                                                                                      |
| DG20 | Skin alterations | 7072  | Pressure ulcer stages                                                                                                  |
| DG20 | Skin alterations | 70720 | Pressure ulcer, unspecified stage                                                                                      |
| DG20 | Skin alterations | 70721 | Pressure ulcer, stage I                                                                                                |
| DG20 | Skin alterations | 70722 | Pressure ulcer, stage II                                                                                               |
| DG20 | Skin alterations | 70723 | Pressure ulcer, stage III                                                                                              |
| DG20 | Skin alterations | 70724 | Pressure ulcer, stage IV                                                                                               |
| DG20 | Skin alterations | 70725 | Pressure ulcer, unstageable                                                                                            |
| DG20 | Skin alterations | 7078  | Chronic ulcer of other specified sites                                                                                 |
| DG20 | Skin alterations | 7079  | Chronic ulcer of unspecified site                                                                                      |
| DG21 | Renal diseases   | 403   | Hypertensive chronic kidney disease                                                                                    |
| DG21 | Renal diseases   | 4030  | Malignant                                                                                                              |
| DG21 | Renal diseases   | 40300 | Hypertensive chronic kidney disease, malignant, with chronic kidney disease stage I through stage IV, or unspecified   |
| DG21 | Renal diseases   | 40301 | Hypertensive chronic kidney disease, malignant, with chronic kidney disease stage V or end stage renal disease         |
| DG21 | Renal diseases   | 4031  | Benign                                                                                                                 |
| DG21 | Renal diseases   | 40310 | Hypertensive chronic kidney disease, benign, with chronic kidney disease stage I through stage IV, or unspecified      |
| DG21 | Renal diseases   | 40311 | Hypertensive chronic kidney disease, benign, with chronic kidney disease stage V or end stage renal disease            |
| DG21 | Renal diseases   | 4039  | Unspecified                                                                                                            |
| DG21 | Renal diseases   | 40390 | Hypertensive chronic kidney disease, unspecified, with chronic kidney disease stage I through stage IV, or unspecified |
| DG21 | Renal diseases   | 40391 | Hypertensive chronic kidney disease, unspecified, with chronic kidney disease stage V or end stage renal disease       |
| DG21 | Renal diseases   | 581   | Nephrotic syndrome                                                                                                     |
| DG21 | Renal diseases   | 5810  | Nephrotic syndrome with lesion of proliferative glomerulonephritis                                                     |
| DG21 | Renal diseases   | 5811  | Nephrotic syndrome with lesion of membranous glomerulonephritis                                                        |
| DG21 | Renal diseases   | 5812  | Nephrotic syndrome with lesion of membranoproliferative glomerulonephritis                                             |
| DG21 | Renal diseases   | 5813  | Nephrotic syndrome with lesion of minimal change glomerulonephritis                                                    |
| DG21 | Renal diseases   | 5818  | With other specified pathological lesion in kidney                                                                     |
| DG21 | Renal diseases   | 58181 | Nephrotic syndrome in diseases classified elsewhere                                                                    |
| DG21 | Renal diseases   | 58189 | Nephrotic syndrome with other specified pathological lesion in kidney                                                  |
| DG21 | Renal diseases   | 5819  | Nephrotic syndrome with unspecified pathological lesion in kidney                                                      |
| DG21 | Renal diseases   | 582   | Chronic glomerulonephritis                                                                                             |

|      |                                  |       |                                                                                                                           |
|------|----------------------------------|-------|---------------------------------------------------------------------------------------------------------------------------|
| DG21 | Renal diseases                   | 5820  | Chronic glomerulonephritis with lesion of proliferative glomerulonephritis                                                |
| DG21 | Renal diseases                   | 5821  | Chronic glomerulonephritis with lesion of membranous glomerulonephritis                                                   |
| DG21 | Renal diseases                   | 5822  | Chronic glomerulonephritis with lesion of membranoproliferative glomerulonephritis                                        |
| DG21 | Renal diseases                   | 5824  | Chronic glomerulonephritis with lesion of rapidly progressive glomerulonephritis                                          |
| DG21 | Renal diseases                   | 5828  | With other specified pathological lesion in kidney                                                                        |
| DG21 | Renal diseases                   | 58281 | Chronic glomerulonephritis in diseases classified elsewhere                                                               |
| DG21 | Renal diseases                   | 58289 | Chronic glomerulonephritis with other specified pathological lesion in kidney                                             |
| DG21 | Renal diseases                   | 5829  | Chronic glomerulonephritis with unspecified pathological lesion in kidney                                                 |
| DG21 | Renal diseases                   | 585   | Chronic kidney disease (CKD)                                                                                              |
| DG21 | Renal diseases                   | 5851  | Chronic kidney disease, Stage I                                                                                           |
| DG21 | Renal diseases                   | 5852  | Chronic kidney disease, Stage II (mild)                                                                                   |
| DG21 | Renal diseases                   | 5853  | Chronic kidney disease, Stage III (moderate)                                                                              |
| DG21 | Renal diseases                   | 5854  | Chronic kidney disease, Stage IV (severe)                                                                                 |
| DG21 | Renal diseases                   | 5855  | Chronic kidney disease, Stage V                                                                                           |
| DG21 | Renal diseases                   | 5856  | End stage renal disease                                                                                                   |
| DG21 | Renal diseases                   | 5859  | Chronic kidney disease, unspecified                                                                                       |
| DG21 | Renal diseases                   | 586   | Renal failure, unspecified                                                                                                |
| DG21 | Renal diseases                   | 587   | Renal sclerosis, unspecified                                                                                              |
| DG21 | Renal diseases                   | 588   | Disorders resulting from impaired renal function                                                                          |
| DG21 | Renal diseases                   | 5880  | Renal osteodystrophy                                                                                                      |
| DG21 | Renal diseases                   | 5881  | Nephrogenic diabetes insipidus                                                                                            |
| DG21 | Renal diseases                   | 5888  | Other specified disorders resulting from impaired renal function                                                          |
| DG21 | Renal diseases                   | 58881 | Secondary hyperparathyroidism (of renal origin)                                                                           |
| DG21 | Renal diseases                   | 58889 | Other specified disorders resulting from impaired renal function                                                          |
| DG21 | Renal diseases                   | 5889  | Unspecified disorder resulting from impaired renal function                                                               |
| DG21 | Renal diseases                   | 59382 | Ureteral fistula                                                                                                          |
| DG22 | Pregnancy and delivery disorders | 6491  | Obesity complicating pregnancy, childbirth, or the puerperium                                                             |
| DG22 | Pregnancy and delivery disorders | 64910 | Obesity complicating pregnancy, childbirth, or the puerperium, unspecified as to episode of care or not applicable        |
| DG22 | Pregnancy and delivery disorders | 64911 | Obesity complicating pregnancy, childbirth, or the puerperium, delivered, with or without mention of antepartum condition |
| DG22 | Pregnancy and delivery disorders | 64912 | Obesity complicating pregnancy, childbirth, or the puerperium, delivered, with mention of postpartum complication         |
| DG22 | Pregnancy and delivery disorders | 64913 | Obesity complicating pregnancy, childbirth, or the puerperium, antepartum condition or complication                       |
| DG22 | Pregnancy and delivery disorders | 64914 | Obesity complicating pregnancy, childbirth, or the puerperium, postpartum condition or complication                       |

|      |                  |       |                                                                           |
|------|------------------|-------|---------------------------------------------------------------------------|
| DG23 | Childhood events | 314   | Hyperkinetic syndrome of childhood                                        |
| DG23 | Childhood events | 3140  | Attention deficit disorder                                                |
| DG23 | Childhood events | 31400 | Attention deficit disorder without mention of hyperactivity               |
| DG23 | Childhood events | 31401 | Attention deficit disorder with hyperactivity                             |
| DG23 | Childhood events | 3141  | Hyperkinesis with developmental delay                                     |
| DG23 | Childhood events | 3142  | Hyperkinetic conduct disorder                                             |
| DG23 | Childhood events | 3148  | Other specified manifestations of hyperkinetic syndrome                   |
| DG23 | Childhood events | 3149  | Unspecified hyperkinetic syndrome                                         |
| DG23 | Childhood events | 330   | Cerebral degenerations usually manifest in childhood                      |
| DG23 | Childhood events | 3300  | Leukodystrophy                                                            |
| DG23 | Childhood events | 3301  | Cerebral lipidoses                                                        |
| DG23 | Childhood events | 3302  | Cerebral degeneration in generalized lipidoses                            |
| DG23 | Childhood events | 3303  | Cerebral degeneration of childhood in other diseases classified elsewhere |
| DG23 | Childhood events | 3308  | Other specified cerebral degenerations in childhood                       |
| DG23 | Childhood events | 3309  | Unspecified cerebral degeneration in childhood                            |
| DG23 | Childhood events | 742   | Other congenital anomalies of nervous system                              |
| DG23 | Childhood events | 7420  | Encephalocele                                                             |
| DG23 | Childhood events | 7421  | Microcephalus                                                             |
| DG23 | Childhood events | 7422  | Congenital reduction deformities of brain                                 |
| DG23 | Childhood events | 7423  | Congenital hydrocephalus                                                  |
| DG23 | Childhood events | 7424  | Other specified congenital anomalies of brain                             |
| DG23 | Childhood events | 7425  | Other specified anomalies of spinal cord                                  |
| DG23 | Childhood events | 74251 | Diastematomyelia                                                          |
| DG23 | Childhood events | 74253 | Hydromyelia                                                               |
| DG23 | Childhood events | 74259 | Other specified congenital anomalies of spinal cord                       |
| DG23 | Childhood events | 7428  | Other specified congenital anomalies of nervous system                    |
| DG23 | Childhood events | 7429  | Unspecified congenital anomaly of brain, spinal cord, and nervous system  |
| DG23 | Childhood events | 74601 | Atresia of pulmonary valve, congenital                                    |
| DG23 | Childhood events | 74602 | Stenosis of pulmonary valve, congenital                                   |
| DG23 | Childhood events | 74609 | Other congenital anomalies of pulmonary valve                             |
| DG23 | Childhood events | 7461  | Tricuspid atresia and stenosis, congenital                                |
| DG23 | Childhood events | 7462  | Ebstein's anomaly                                                         |
| DG23 | Childhood events | 7463  | Congenital stenosis of aortic valve                                       |
| DG23 | Childhood events | 7464  | Congenital insufficiency of aortic valve                                  |
| DG23 | Childhood events | 7465  | Congenital mitral stenosis                                                |
| DG23 | Childhood events | 7466  | Congenital mitral insufficiency                                           |
| DG23 | Childhood events | 7467  | Hypoplastic left heart syndrome                                           |
| DG23 | Childhood events | 7468  | Other specified anomalies of heart                                        |
| DG23 | Childhood events | 74681 | Subaortic stenosis                                                        |
| DG23 | Childhood events | 74682 | Cor triatriatum                                                           |
| DG23 | Childhood events | 74683 | Infundibular pulmonic stenosis                                            |
| DG23 | Childhood events | 74684 | Obstructive anomalies of heart, not elsewhere classified                  |
| DG23 | Childhood events | 74685 | Coronary artery anomaly                                                   |
| DG23 | Childhood events | 74686 | Congenital heart block                                                    |
| DG23 | Childhood events | 74687 | Malposition of heart and cardiac apex                                     |

|      |                  |       |                                                                  |
|------|------------------|-------|------------------------------------------------------------------|
| DG23 | Childhood events | 74689 | Other specified congenital anomalies of heart                    |
| DG23 | Childhood events | 7469  | Unspecified congenital anomaly of heart                          |
| DG23 | Childhood events | 747   | Other congenital anomalies of circulatory system                 |
| DG23 | Childhood events | 7470  | Patent ductus arteriosus                                         |
| DG23 | Childhood events | 7471  | Coarctation of aorta                                             |
| DG23 | Childhood events | 74710 | Coarctation of aorta (preductal) (postductal)                    |
| DG23 | Childhood events | 74711 | Interruption of aortic arch                                      |
| DG23 | Childhood events | 7472  | Other anomalies of aorta                                         |
| DG23 | Childhood events | 74720 | Anomaly of aorta, unspecified                                    |
| DG23 | Childhood events | 74721 | Anomalies of aortic arch                                         |
| DG23 | Childhood events | 74722 | Atresia and stenosis of aorta                                    |
| DG23 | Childhood events | 74729 | Other anomalies of aorta                                         |
| DG23 | Childhood events | 7473  | Anomalies of pulmonary artery                                    |
| DG23 | Childhood events | 74731 | Pulmonary artery coarctation and atresia                         |
| DG23 | Childhood events | 74732 | Pulmonary arteriovenous malformation                             |
|      |                  |       | Other anomalies of pulmonary artery and pulmonary circulation    |
| DG23 | Childhood events | 74739 |                                                                  |
| DG23 | Childhood events | 7474  | Anomalies of great veins                                         |
| DG23 | Childhood events | 74740 | Anomaly of great veins, unspecified                              |
| DG23 | Childhood events | 74741 | Total anomalous pulmonary venous connection                      |
| DG23 | Childhood events | 74742 | Partial anomalous pulmonary venous connection                    |
| DG23 | Childhood events | 74749 | Other anomalies of great veins                                   |
| DG23 | Childhood events | 7475  | Absence or hypoplasia of umbilical artery                        |
| DG23 | Childhood events | 7476  | Other anomalies of peripheral vascular system                    |
| DG23 | Childhood events | 74760 | Anomaly of the peripheral vascular system, unspecified site      |
| DG23 | Childhood events | 74761 | Gastrointestinal vessel anomaly                                  |
| DG23 | Childhood events | 74762 | Renal vessel anomaly                                             |
| DG23 | Childhood events | 74763 | Upper limb vessel anomaly                                        |
| DG23 | Childhood events | 74764 | Lower limb vessel anomaly                                        |
|      |                  |       | Anomalies of other specified sites of peripheral vascular system |
| DG23 | Childhood events | 74769 |                                                                  |
| DG23 | Childhood events | 7478  | Other specified anomalies of circulatory system                  |
| DG23 | Childhood events | 74781 | Anomalies of cerebrovascular system                              |
| DG23 | Childhood events | 74782 | Spinal vessel anomaly                                            |
| DG23 | Childhood events | 74783 | Persistent fetal circulation                                     |
| DG23 | Childhood events | 74789 | Other specified anomalies of circulatory system                  |
| DG23 | Childhood events | 7479  | Unspecified anomaly of circulatory system                        |
| DG23 | Childhood events | 748   | Congenital anomalies of respiratory system                       |
| DG23 | Childhood events | 7480  | Choanal atresia                                                  |
| DG23 | Childhood events | 7481  | Other anomalies of nose                                          |
| DG23 | Childhood events | 7482  | Web of larynx                                                    |
| DG23 | Childhood events | 7483  | Other anomalies of larynx, trachea, and bronchus                 |
| DG23 | Childhood events | 7484  | Congenital cystic lung                                           |
| DG23 | Childhood events | 7485  | Agenesis, hypoplasia, and dysplasia of lung                      |
| DG23 | Childhood events | 7486  | Other anomalies of lung                                          |
| DG23 | Childhood events | 74860 | Anomaly of lung, unspecified                                     |
| DG23 | Childhood events | 74861 | Congenital bronchiectasis                                        |

|      |                   |       |                                                                                 |
|------|-------------------|-------|---------------------------------------------------------------------------------|
| DG23 | Childhood events  | 74869 | Other congenital anomalies of lung                                              |
| DG23 | Childhood events  | 7488  | Other specified anomalies of respiratory system                                 |
| DG23 | Childhood events  | 7489  | Unspecified anomaly of respiratory system                                       |
| DG23 | Childhood events  | 749   | Cleft palate and cleft lip                                                      |
| DG23 | Childhood events  | 7490  | Cleft palate                                                                    |
| DG23 | Childhood events  | 74900 | Cleft palate, unspecified                                                       |
| DG23 | Childhood events  | 74901 | Cleft palate, unilateral, complete                                              |
| DG23 | Childhood events  | 74902 | Cleft palate, unilateral, incomplete                                            |
| DG23 | Childhood events  | 74903 | Cleft palate, bilateral, complete                                               |
| DG23 | Childhood events  | 74904 | Cleft palate, bilateral, incomplete                                             |
| DG23 | Childhood events  | 7491  | Cleft lip                                                                       |
| DG23 | Childhood events  | 74910 | Cleft lip, unspecified                                                          |
| DG23 | Childhood events  | 74911 | Cleft lip, unilateral, complete                                                 |
| DG23 | Childhood events  | 74912 | Cleft lip, unilateral, incomplete                                               |
| DG23 | Childhood events  | 74913 | Cleft lip, bilateral, complete                                                  |
| DG23 | Childhood events  | 74914 | Cleft lip, bilateral, incomplete                                                |
| DG23 | Childhood events  | 7492  | Cleft palate with cleft lip                                                     |
| DG23 | Childhood events  | 74920 | Cleft palate with cleft lip, unspecified                                        |
| DG23 | Childhood events  | 74921 | Cleft palate with cleft lip, unilateral, complete                               |
| DG23 | Childhood events  | 74922 | Cleft palate with cleft lip, unilateral, incomplete                             |
| DG23 | Childhood events  | 74923 | Cleft palate with cleft lip, bilateral, complete                                |
| DG23 | Childhood events  | 74924 | Cleft palate with cleft lip, bilateral, incomplete                              |
| DG23 | Childhood events  | 74925 | Other combinations of cleft palate with cleft lip                               |
| DG23 | Childhood events  | 76071 | Alcohol affecting fetus or newborn via placenta or breast milk                  |
| DG23 | Childhood events  | 76072 | Narcotics affecting fetus or newborn via placenta or breast milk                |
| DG23 | Childhood events  | 76073 | Hallucinogenic agents affecting fetus or newborn via placenta or breast milk    |
| DG23 | Childhood events  | 76075 | Cocaine affecting fetus or newborn via placenta or breast milk                  |
| DG23 | Childhood events  | 76076 | Diethylstilbestrol [DES] affecting fetus or newborn via placenta or breast milk |
| DG23 | Childhood events  | 76077 | Anticonvulsants affecting fetus or newborn via placenta or breast milk          |
| DG23 | Childhood events  | 76078 | Antimetabolic agents affecting fetus or newborn via placenta or breast milk     |
| DG24 | Eyes disorders    | 3721  | Chronic conjunctivitis                                                          |
| DG24 | Eyes disorders    | 37210 | Chronic conjunctivitis, unspecified                                             |
| DG24 | Eyes disorders    | 37211 | Simple chronic conjunctivitis                                                   |
| DG24 | Eyes disorders    | 37212 | Chronic follicular conjunctivitis                                               |
| DG24 | Eyes disorders    | 37213 | Vernal conjunctivitis                                                           |
| DG24 | Eyes disorders    | 37214 | Other chronic allergic conjunctivitis                                           |
| DG24 | Eyes disorders    | 37215 | Parasitic conjunctivitis                                                        |
| DG25 | Other alterations | 302   | Sexual and gender identity disorders                                            |
| DG25 | Other alterations | 3020  | Ego-dystonic sexual orientation                                                 |
| DG25 | Other alterations | 3021  | Zoophilia                                                                       |

|      |                   |       |                                                                         |
|------|-------------------|-------|-------------------------------------------------------------------------|
| DG25 | Other alterations | 3022  | Pedophilia                                                              |
| DG25 | Other alterations | 3023  | Transvestic fetishism                                                   |
| DG25 | Other alterations | 3024  | Exhibitionism                                                           |
| DG25 | Other alterations | 3025  | Trans-sexualism                                                         |
| DG25 | Other alterations | 30250 | Trans-sexualism with unspecified sexual history                         |
| DG25 | Other alterations | 30251 | Trans-sexualism with asexual history                                    |
| DG25 | Other alterations | 30252 | Trans-sexualism with homosexual history                                 |
| DG25 | Other alterations | 30253 | Trans-sexualism with heterosexual history                               |
| DG25 | Other alterations | 3026  | Gender identity disorder in children                                    |
| DG25 | Other alterations | 3027  | Psychosexual dysfunction                                                |
| DG25 | Other alterations | 30270 | Psychosexual dysfunction, unspecified                                   |
| DG25 | Other alterations | 30271 | Hypoactive sexual desire disorder                                       |
| DG25 | Other alterations | 30272 | Psychosexual dysfunction with inhibited sexual excitement               |
| DG25 | Other alterations | 30273 | Female orgasmic disorder                                                |
| DG25 | Other alterations | 30274 | Male orgasmic disorder                                                  |
| DG25 | Other alterations | 30275 | Premature ejaculation                                                   |
| DG25 | Other alterations | 30276 | Dyspareunia, psychogenic                                                |
| DG25 | Other alterations | 30279 | Psychosexual dysfunction with other specified psychosexual dysfunctions |
| DG25 | Other alterations | 3028  | Other specified psychosexual disorders                                  |
| DG25 | Other alterations | 30281 | Fetishism                                                               |
| DG25 | Other alterations | 30282 | Voyeurism                                                               |
| DG25 | Other alterations | 30283 | Sexual masochism                                                        |
| DG25 | Other alterations | 30284 | Sexual sadism                                                           |
| DG25 | Other alterations | 30285 | Gender identity disorder in adolescents or adults                       |
| DG25 | Other alterations | 30289 | Other specified psychosexual disorders                                  |
| DG25 | Other alterations | 3029  | Unspecified psychosexual disorder                                       |
| DG25 | Other alterations | 3070  | Adult onset fluency disorder                                            |
| DG25 | Other alterations | 3071  | Anorexia nervosa                                                        |
| DG25 | Other alterations | 3072  | Tics                                                                    |
| DG25 | Other alterations | 30720 | Tic disorder, unspecified                                               |
| DG25 | Other alterations | 30721 | Transient tic disorder                                                  |
| DG25 | Other alterations | 30722 | Chronic motor or vocal tic disorder                                     |
| DG25 | Other alterations | 30723 | Tourette's disorder                                                     |
| DG25 | Other alterations | 3073  | Stereotypic movement disorder                                           |
| DG25 | Other alterations | 30740 | Nonorganic sleep disorder, unspecified                                  |
| DG25 | Other alterations | 30742 | Persistent disorder of initiating or maintaining sleep                  |
| DG25 | Other alterations | 30744 | Persistent disorder of initiating or maintaining wakefulness            |
| DG25 | Other alterations | 30745 | Circadian rhythm sleep disorder of nonorganic origin                    |
| DG25 | Other alterations | 30746 | Sleep arousal disorder                                                  |
| DG25 | Other alterations | 30747 | Other dysfunctions of sleep stages or arousal from sleep                |
| DG25 | Other alterations | 30748 | Repetitive intrusions of sleep                                          |
| DG25 | Other alterations | 30749 | Other specific disorders of sleep of nonorganic origin                  |
| DG25 | Other alterations | 3075  | Other and unspecified disorders of eating                               |
| DG25 | Other alterations | 30750 | Eating disorder, unspecified                                            |
| DG25 | Other alterations | 30751 | Bulimia nervosa                                                         |

|      |                         |       |                                                                               |
|------|-------------------------|-------|-------------------------------------------------------------------------------|
| DG25 | Other alterations       | 30752 | Pica                                                                          |
| DG25 | Other alterations       | 30753 | Rumination disorder                                                           |
| DG25 | Other alterations       | 30754 | Psychogenic vomiting                                                          |
| DG25 | Other alterations       | 30759 | Other disorders of eating                                                     |
| DG25 | Other alterations       | 3076  | Enuresis                                                                      |
| DG25 | Other alterations       | 3077  | Encopresis                                                                    |
| DG25 | Other alterations       | 3078  | Pain disorders related to psychological factors                               |
| DG25 | Other alterations       | 30780 | Psychogenic pain, site unspecified                                            |
| DG25 | Other alterations       | 30781 | Tension headache                                                              |
| DG25 | Other alterations       | 30789 | Other pain disorders related to psychological factors                         |
| DG25 | Other alterations       | 3079  | Other and unspecified special symptoms or syndromes, not elsewhere classified |
| DG25 | Other alterations       | 3380  | Central pain syndrome                                                         |
| DG25 | Other alterations       | 3382  | Chronic pain                                                                  |
| DG25 | Other alterations       | 33821 | Chronic pain due to trauma                                                    |
| DG25 | Other alterations       | 33822 | Chronic post-thoracotomy pain                                                 |
| DG25 | Other alterations       | 33828 | Other chronic postoperative pain                                              |
| DG25 | Other alterations       | 33829 | Other chronic pain                                                            |
| DG25 | Other alterations       | 3383  | Neoplasm related pain (acute) (chronic)                                       |
| DG25 | Other alterations       | 3384  | Chronic pain syndrome                                                         |
| DG25 | Other alterations       | 797   | Senility without mention of psychosis                                         |
| DG25 | Other alterations       | 79951 | Attention or concentration deficit                                            |
| DG25 | Other alterations       | 79952 | Cognitive communication deficit                                               |
| DG25 | Other alterations       | 79953 | Visuospatial deficit                                                          |
| DG25 | Other alterations       | 79954 | Psychomotor deficit                                                           |
| DG25 | Other alterations       | 79955 | Frontal lobe and executive function deficit                                   |
| DG25 | Other alterations       | 99981 | Extravasation of vesicant chemotherapy                                        |
| DG26 | Immune system disorders | 279   | Disorders involving the immune mechanism                                      |
| DG26 | Immune system disorders | 2790  | Deficiency of humoral immunity                                                |
| DG26 | Immune system disorders | 27900 | Hypogammaglobulinemia, unspecified                                            |
| DG26 | Immune system disorders | 27901 | Selective IgA immunodeficiency                                                |
| DG26 | Immune system disorders | 27902 | Selective IgM immunodeficiency                                                |
| DG26 | Immune system disorders | 27903 | Other selective immunoglobulin deficiencies                                   |
| DG26 | Immune system disorders | 27904 | Congenital hypogammaglobulinemia                                              |
| DG26 | Immune system disorders | 27905 | Immunodeficiency with increased IgM                                           |
| DG26 | Immune system disorders | 27906 | Common variable immunodeficiency                                              |
| DG26 | Immune system disorders | 27909 | Other deficiency of humoral immunity                                          |



|      |                              |       |                                                                    |
|------|------------------------------|-------|--------------------------------------------------------------------|
| DG26 | Immune system disorders      | 2791  | Deficiency of cell-mediated immunity                               |
| DG26 | Immune system disorders      | 27910 | Immunodeficiency with predominant T-cell defect, unspecified       |
| DG26 | Immune system disorders      | 27911 | Digeorge's syndrome                                                |
| DG26 | Immune system disorders      | 27912 | Wiskott-aldrich syndrome                                           |
| DG26 | Immune system disorders      | 27913 | Nezelof's syndrome                                                 |
| DG26 | Immune system disorders      | 27919 | Other deficiency of cell-mediated immunity                         |
| DG26 | Immune system disorders      | 2792  | Combined immunity deficiency                                       |
| DG26 | Immune system disorders      | 2793  | Unspecified immunity deficiency                                    |
| DG26 | Immune system disorders      | 2794  | Autoimmune disease, not elsewhere classified                       |
| DG26 | Immune system disorders      | 27941 | Autoimmune lymphoproliferative syndrome                            |
| DG26 | Immune system disorders      | 27949 | Autoimmune disease, not elsewhere classified                       |
| DG26 | Immune system disorders      | 2795  | Graft-versus-host disease                                          |
| DG26 | Immune system disorders      | 27950 | Graft-versus-host disease, unspecified                             |
| DG26 | Immune system disorders      | 27951 | Acute graft-versus-host disease                                    |
| DG26 | Immune system disorders      | 27952 | Chronic graft-versus-host disease                                  |
| DG26 | Immune system disorders      | 27953 | Acute on chronic graft-versus-host disease                         |
| DG26 | Immune system disorders      | 2798  | Other specified disorders involving the immune mechanism           |
| DG26 | Immune system disorders      | 2799  | Unspecified disorder of immune mechanism                           |
| DG26 | Immune system disorders      | 79516 | Papanicolaou smear of vagina with cytologic evidence of malignancy |
| DG27 | Bone and cartilage disorders | 720   | Ankylosing spondylitis and other inflammatory spondylopathies      |
| DG27 | Bone and cartilage disorders | 7200  | Ankylosing spondylitis                                             |
| DG27 | Bone and cartilage disorders | 7201  | Spinal enthesopathy                                                |
| DG27 | Bone and cartilage disorders | 7202  | Sacroiliitis, not elsewhere classified                             |
| DG27 | Bone and cartilage disorders | 7208  | Other inflammatory spondylopathies                                 |
| DG27 | Bone and cartilage disorders | 72081 | Inflammatory spondylopathies in diseases classified elsewhere      |

|      |                              |       |                                                             |
|------|------------------------------|-------|-------------------------------------------------------------|
| DG27 | Bone and cartilage disorders | 72089 | Other inflammatory spondylopathies                          |
| DG27 | Bone and cartilage disorders | 7209  | Unspecified inflammatory spondylopathy                      |
| DG27 | Bone and cartilage disorders | 732   | Osteochondropathies                                         |
| DG27 | Bone and cartilage disorders | 7320  | Juvenile osteochondrosis of spine                           |
| DG27 | Bone and cartilage disorders | 7321  | Juvenile osteochondrosis of hip and pelvis                  |
| DG27 | Bone and cartilage disorders | 7322  | Nontraumatic slipped upper femoral epiphysis                |
| DG27 | Bone and cartilage disorders | 7323  | Juvenile osteochondrosis of upper extremity                 |
| DG27 | Bone and cartilage disorders | 7324  | Juvenile osteochondrosis of lower extremity, excluding foot |
| DG27 | Bone and cartilage disorders | 7325  | Juvenile osteochondrosis of foot                            |
| DG27 | Bone and cartilage disorders | 7326  | Other juvenile osteochondrosis                              |
| DG27 | Bone and cartilage disorders | 7327  | Osteochondritis dissecans                                   |
| DG27 | Bone and cartilage disorders | 7328  | Other specified forms of osteochondropathy                  |
| DG27 | Bone and cartilage disorders | 7329  | Unspecified osteochondropathy                               |
| DG27 | Bone and cartilage disorders | 7330  | Osteoporosis                                                |
| DG27 | Bone and cartilage disorders | 73300 | Osteoporosis, unspecified                                   |
| DG27 | Bone and cartilage disorders | 73301 | Senile osteoporosis                                         |
| DG27 | Bone and cartilage disorders | 73302 | Idiopathic osteoporosis                                     |
| DG27 | Bone and cartilage disorders | 73303 | Disuse osteoporosis                                         |
| DG27 | Bone and cartilage disorders | 73309 | Other osteoporosis                                          |
| DG27 | Bone and cartilage disorders | 7334  | Aseptic necrosis of bone                                    |
| DG27 | Bone and cartilage disorders | 73340 | Aseptic necrosis of bone, site unspecified                  |
| DG27 | Bone and cartilage disorders | 73341 | Aseptic necrosis of head of humerus                         |
| DG27 | Bone and cartilage disorders | 73342 | Aseptic necrosis of head and neck of femur                  |
| DG27 | Bone and cartilage disorders | 73343 | Aseptic necrosis of medial femoral condyle                  |
| DG27 | Bone and cartilage disorders | 73344 | Aseptic necrosis of talus                                   |

|      |                              |       |                                                                   |
|------|------------------------------|-------|-------------------------------------------------------------------|
| DG27 | Bone and cartilage disorders | 73345 | Aseptic necrosis of bone, jaw                                     |
| DG27 | Bone and cartilage disorders | 73349 | Aseptic necrosis of bone, other                                   |
| DG27 | Bone and cartilage disorders | 7370  | Adolescent postural kyphosis                                      |
| DG27 | Bone and cartilage disorders | 7371  | Kyphosis (acquired)                                               |
| DG27 | Bone and cartilage disorders | 73710 | Kyphosis (acquired) (postural)                                    |
| DG27 | Bone and cartilage disorders | 73711 | Kyphosis due to radiation                                         |
| DG27 | Bone and cartilage disorders | 73712 | Kyphosis, postlaminectomy                                         |
| DG27 | Bone and cartilage disorders | 73719 | Other kyphosis (acquired)                                         |
| DG27 | Bone and cartilage disorders | 7372  | Lordosis (acquired)                                               |
| DG27 | Bone and cartilage disorders | 73720 | Lordosis (acquired) (postural)                                    |
| DG27 | Bone and cartilage disorders | 73721 | Lordosis, postlaminectomy                                         |
| DG27 | Bone and cartilage disorders | 73722 | Other postsurgical lordosis                                       |
| DG27 | Bone and cartilage disorders | 73729 | Other lordosis (acquired)                                         |
| DG27 | Bone and cartilage disorders | 7373  | Kyphoscoliosis and scoliosis                                      |
| DG27 | Bone and cartilage disorders | 73730 | Scoliosis [and kyphoscoliosis], idiopathic                        |
| DG27 | Bone and cartilage disorders | 73731 | Resolving infantile idiopathic scoliosis                          |
| DG27 | Bone and cartilage disorders | 73732 | Progressive infantile idiopathic scoliosis                        |
| DG27 | Bone and cartilage disorders | 73733 | Scoliosis due to radiation                                        |
| DG27 | Bone and cartilage disorders | 73734 | Thoracogenic scoliosis                                            |
| DG27 | Bone and cartilage disorders | 73739 | Other kyphoscoliosis and scoliosis                                |
| DG27 | Bone and cartilage disorders | 7374  | Curvature of spine associated with other conditions               |
| DG27 | Bone and cartilage disorders | 73740 | Curvature of spine, unspecified, associated with other conditions |
| DG27 | Bone and cartilage disorders | 73741 | Kyphosis associated with other conditions                         |
| DG27 | Bone and cartilage disorders | 73742 | Lordosis associated with other conditions                         |
| DG27 | Bone and cartilage disorders | 73743 | Scoliosis associated with other conditions                        |

**Table S3. Comorbidity risk in the CHSS and Medicare datasets.** Phi-correlation coefficient ( $\Phi$ ) and relative risk (RR) with 99.99% confidence intervals (CI) are shown for the two healthcare systems. DGs in the two datasets were compared using t-test. Significance was indicated as \* $p < 0.0001$ . Excluded DGs are shown with the filtering criteria in the Exclusion criteria column at the bottom of the table.

| ID                  | Group                                   | CHSS                   |        | Medicare               |        | Group difference (p-val) | Exclusion criteria   |
|---------------------|-----------------------------------------|------------------------|--------|------------------------|--------|--------------------------|----------------------|
|                     |                                         | RR (99.9% CI)          | $\Phi$ | RR (99.9% CI)          | $\Phi$ |                          |                      |
| DG01                | Respiratory diseases                    | 4.64 (4.5865, 4.6955)* | 0.66*  | 1.78 (1.778, 1.7863)*  | 0.23*  | <0.0001*                 |                      |
| DG15                | Dependence                              | 2.3 (2.2692, 2.3241)*  | 0.23*  | 2.37 (2.3453, 2.3877)* | 0.11*  | <0.0001*                 |                      |
| DG11                | Circulation disorders                   | 1.88 (1.8438, 1.9095)* | 0.12*  | 1.47 (1.4611, 1.4744)* | 0.09*  | <0.0001*                 |                      |
| DG02                | Heart diseases                          | 1.53 (1.5175, 1.5398)* | 0.16*  | 1.29 (1.284, 1.2884)*  | 0.13*  | <0.0001*                 |                      |
| DG05                | Malignancies of lower respiratory tract | 2.56 (2.4385, 2.6818)* | 0.07*  | 1.99 (1.9736, 2.0159)* | 0.07*  | <0.0001*                 |                      |
| DG04                | Malignancies of upper respiratory tract | 1.87 (1.8203, 1.9199)* | 0.08*  | 1.44 (1.4282, 1.4538)* | 0.04*  | <0.0001*                 |                      |
| DG10                | Genitalia and urinary disorders         | 1.48 (1.4613, 1.4898)* | 0.12*  | 1.25 (1.2389, 1.2543)* | 0.04*  | <0.0001*                 |                      |
| DG21                | Renal diseases                          | 1.53 (1.5015, 1.549)*  | 0.08*  | 1.51 (1.5034, 1.5255)* | 0.06*  | >0.0001                  |                      |
| DG07                | Hematological alterations               | 1.54 (1.5082, 1.5785)* | 0.06*  | 1.36 (1.3534, 1.3689)* | 0.06*  | <0.0001*                 |                      |
| DG08                | Digestive alterations                   | 1.39 (1.3734, 1.4028)* | 0.09*  | 1.28 (1.2794, 1.2873)* | 0.08*  | <0.0001*                 |                      |
| DG18                | Nutrition disorders                     | 1.53 (1.4832, 1.582)*  | 0.04*  | 1.77 (1.7547, 1.7866)* | 0.07*  | <0.0001*                 |                      |
| DG20                | Skin alterations                        | 1.42 (1.3914, 1.4525)* | 0.05*  | 1.26 (1.26, 1.2664)*   | 0.09*  | <0.0001*                 |                      |
| DG17                | Central nervous diseases                | 1.42 (1.389, 1.4615)*  | 0.04*  | 1.43 (1.4194, 1.4503)* | 0.04*  | >0.0001                  |                      |
| DG06                | Upper respiratory diseases              | 1.28 (1.2526, 1.3014)* | 0.04*  | 1.6 (1.5805, 1.6203)*  | 0.04*  | <0.0001*                 |                      |
| DG25                | Other alterations                       | 1.21 (1.1926, 1.2279)* | 0.04*  | 1.94 (1.9242, 1.9536)* | 0.1*   | <0.0001*                 |                      |
| DG19                | Endocrine diseases                      | 1.31 (1.2737, 1.3568)* | 0.03*  | 1.43 (1.4279, 1.4368)* | 0.11*  | <0.0001*                 |                      |
| DG14                | Psychiatric disorders                   | 1.09 (1.0793, 1.0999)* | 0.03*  | 1.38 (1.3692, 1.385)*  | 0.06*  | <0.0001*                 |                      |
| DG27                | Bone and cartilage disorders            | 0.95 (0.9383, 0.9681)* | -0.01* | 1.5 (1.4862, 1.513)*   | 0.05*  | <0.0001*                 |                      |
| <b>Excluded DGs</b> |                                         |                        |        |                        |        |                          |                      |
| DG3                 | Infectious diseases                     | -                      | -      | -                      | -      | -                        | non-chronic          |
| DG24                | Eyes disorders                          | -                      | -      | -                      | -      | -                        | non-chronic          |
| DG9                 | Trauma                                  | -                      | -      | -                      | -      | -                        | low prevalence (<1%) |
| DG12                | Tuberculosis related alterations        | -                      | -      | -                      | -      | -                        | low prevalence (<1%) |
| DG13                | Intoxication/poisoning                  | -                      | -      | -                      | -      | -                        | low prevalence (<1%) |
| DG16                | Sleep disorders                         | -                      | -      | -                      | -      | -                        | low prevalence (<1%) |
| DG22                | Pregnancy and delivery disorders        | -                      | -      | -                      | -      | -                        | low prevalence (<1%) |
| DG23                | Childhood events                        | -                      | -      | -                      | -      | -                        | low prevalence (<1%) |
| DG26                | Immune system disorders                 | -                      | -      | -                      | -      | -                        | low prevalence (<1%) |

**Table S4. Proportion of chronic and acute disease in the Medicare dataset.**  
Columns show the number of chronic and acute cases together, only chronic cases and the proportion of only chronic cases in the Medicare dataset.

| Group ID | Name                                    | N<br>chronic+acute | N chronic | Proportion<br>of chronic<br>(%) |
|----------|-----------------------------------------|--------------------|-----------|---------------------------------|
| DG1      | Respiratory diseases                    | 6912595            | 2633165   | 38.1%                           |
| DG2      | Heart diseases                          | 17690349           | 17239177  | 97.4%                           |
| DG3      | Infectious diseases                     | 3086654            | 0         | 0.0%                            |
| DG4      | Malignancies of upper respiratory tract | 785534             | 620828    | 79.0%                           |
| DG5      | Malignancies of lower respiratory tract | 442409             | 442409    | 100.0%                          |
| DG6      | Upper respiratory diseases              | 348059             | 119957    | 34.5%                           |
| DG7      | Hematological alterations               | 1796501            | 382797    | 21.3%                           |
| DG8      | Digestive alterations                   | 6926922            | 1106052   | 16.0%                           |
| DG9      | Trauma                                  | 449962             | 15700     | 3.5%                            |
| DG10     | Genitalia and urinary disorders         | 1802392            | 854195    | 47.4%                           |
| DG11     | Circulation disorders                   | 2676207            | 1804818   | 67.4%                           |
| DG12     | Tuberculosis related alterations        | 9077               | 9077      | 100.0%                          |
| DG13     | Intoxication / poisoning                | 110743             | 908       | 0.8%                            |
| DG14     | Psychiatric disorders                   | 1999359            | 1466104   | 73.3%                           |
| DG15     | Dependence                              | 585975             | 448904    | 76.6%                           |
| DG16     | Sleep disorders                         | 2799               | 2799      | 100.0%                          |
| DG17     | Central nervous diseases                | 503734             | 219856    | 43.6%                           |
| DG18     | Nutrition disorders                     | 975202             | 857012    | 87.9%                           |
| DG19     | Endocrine diseases                      | 3897326            | 291182    | 7.5%                            |
| DG20     | Skin alterations                        | 6069025            | 491349    | 8.1%                            |
| DG21     | Renal diseases                          | 1284160            | 640267    | 49.9%                           |
| DG22     | Pregnancy and delivery disorders        | 1590               | 0         | 0.0%                            |
| DG23     | Childhood events                        | 40668              | 19803     | 48.7%                           |
| DG24     | Eyes disorders                          | 53354              | 0         | 0.0%                            |
| DG25     | Other alterations                       | 765605             | 25283     | 3.3%                            |
| DG26     | Immune system disorders                 | 28650              | 8104      | 28.3%                           |
| DG27     | Bone and cartilage disorders            | 673312             | 14486     | 2.2%                            |

## REFERENCES

- 1 Gomez-Cabrero D, Menche J, Vargas C, *et al.* From comorbidities of chronic obstructive pulmonary disease to identification of shared molecular mechanisms by data integration. *BMC Bioinformatics* 2016;**17**:23–35. doi:10.1186/s12859-016-1291-3
- 2 Hidalgo CA, Blumm N, Barabási AL, *et al.* A Dynamic Network Approach for the Study of Human Phenotypes. *PLoS Comput Biol* 2009;**5**:e1000353. doi:10.1371/journal.pcbi.1000353
